# Supplementary material for: Use and detailed metric properties of patient-reported outcome measures for rheumatoid arthritis: a systematic review covering two decades
Source: PubMed Central journal article supplement (PMC8356163; doi:10.1136/rmdopen-2021-001707), 2021-08-10
Supplement: rmdopen-2021-001707supp002.pdf [file rmdopen-2021-001707supp002.pdf]

## Supplementary File 2

## Summary of PROM-Specific Evidence

Supplementary Table 1: General characteristics and summary psychometric review of all versions of identified PROMs: Pain (b280, b289)

| Name (Domain)                                          | Acronym          | First Author/ Year  | REF (A) | Generic/ Disease Specific | N of items | Response Options | Recall period | Use | Psychometric Summary |                |             |         |  |
|--------------------------------------------------------|------------------|---------------------|---------|---------------------------|------------|------------------|---------------|-----|----------------------|----------------|-------------|---------|--|
|                                                        |                  |                     |         |                           |            |                  |               |     | Validity             | Discrimination | Feasibility | Overall |  |
| Arthritis Impact Measurement Scales (Pain)             | AIMS             | Meenan RF. 1980     | 1       | D*                        | 4          | 6                | Past month    | 8   |                      |                |             |         |  |
| Arthritis Impact Measurement Scales 2 (Arthritis pain) | AIMS2            | Meenan RF. 1992     | 2       | D                         | 5          | 5                | Past month    | 52  |                      |                |             |         |  |
| Australian/Canadian Hand Osteoarthritis Index (Pain)   | AUSCAN           | Bellamy N. 2002     | 3       | D*                        | 5          | 5, 100 (VAS)     | 48 hours      | 2   |                      |                |             |         |  |
| Foot Function Index (Pain)                             | FFI              | Budiman-Mak E. 1991 | 4       | D                         | 9          | 10               | Past week     | 35  |                      |                |             |         |  |
| Foot Health Status Questionnaire (Foot pain)           | FHSQ             | Bennett PJ. 1998    | 5       | G                         | 4          | 5                | Past week     | 4   |                      |                |             |         |  |
| Michigan Hand Outcomes Questionnaire (Pain)            | MHQ              | Chung KC. 1998      | 6       | D*                        | 5          | 5                | Past week     | 37  |                      |                |             |         |  |
| Medical Outcomes Study Pain Intensity scale (Total)    | MOS-PI           | Gonzalez VM. 1995   | 7       | G                         | 5          | 11/6             | Previous week | 1   |                      |                |             |         |  |
| Nottingham Health Profile (Pain)                       | NHP              | Hunt SM. 1985       | 8       | D*                        | 8          | 2                | At the moment | 38  |                      |                |             |         |  |
| Oxford Elbow Score (Pain)                              | OES              | Dawson J. 2008      | 9       | G                         | 4          | 5                | Past 4 weeks  | 4   |                      |                |             |         |  |
| PainDETECT Questionnaire (Total)                       | PDQ (PainDetect) | Freyenhagen R. 2006 | 10      | G                         | 12         | 6, 11            | 4 Weeks       | 21  |                      |                |             |         |  |

|                                                                                             |                   |                    |    |    |    |     |               |     |  |  |  |  |  |
|---------------------------------------------------------------------------------------------|-------------------|--------------------|----|----|----|-----|---------------|-----|--|--|--|--|--|
| Patient-Reported Outcomes Measurement Information System – 29 Profile (Pain Interference)   | PROMIS-29-Profile | Hinchcliff M. 2011 | 11 | G  | 4  | 5   | 7 days        | 2   |  |  |  |  |  |
| Patient-Reported Outcomes Measurement Information System Pain Intensity 3a-SF (Total)       | PROMIS-PI 3a-SF   | Stone AA. 2016     | 12 | G  | 3  | 5   | Past 7 days   | 2   |  |  |  |  |  |
| RAND 36-Item Health Survey (Pain)                                                           | RAND-36           | Hays RD. 1993      | 13 | G  | 2  | 5-6 | Past 4 weeks  | 20  |  |  |  |  |  |
| Rheumatoid and Arthritis Outcome Score (Pain)                                               | RAOS              | Bremander AB. 2003 | 14 | D  | 9  | 5   | Last week     | 6   |  |  |  |  |  |
| Rheumatoid Arthritis Pain Scale (Total)                                                     | RAPS              | Anderson DL. 2001  | 15 | D  | 24 | 7   | Last week     | 5   |  |  |  |  |  |
| Score for Assessment and Quantification of Chronic Rheumatic Affections of the Hands (Pain) | SACRAH            | Leeb B. 2003       | 16 | D  | 4  | VAS | 48 hours      | 2   |  |  |  |  |  |
| Self-Administered Foot Evaluation Questionnaire (Pain and Pain Related)                     | SAFE-Q            | Niki H. 2011       | 17 | D* | 9  | 5   | Past week     | 8   |  |  |  |  |  |
| Medical Outcomes Study Short Form 36-Item (Bodily Pain)                                     | SF-36             | Ware JE. 1992      | 18 | D* | 2  | 5   | Past 4 weeks  | 562 |  |  |  |  |  |
| Short Form McGill Pain Questionnaire (Pain)                                                 | SF-MPQ            | Melzack R. 1987    | 19 | G  | 15 | 3-5 | At the moment | 7   |  |  |  |  |  |
| Western Ontario McMaster Osteoarthritis Index (Pain)                                        | WOMAC             | Bellamy N. 1988    | 20 | G  | 5  | 5   | Currently     | 57  |  |  |  |  |  |

Evidence: Strong; Moderate; Weak; Absent

**Supplementary Table 2: General characteristics and summary psychometric review of all versions of identified PROMs:**  
*Fatigue (b130, b4552)*

| Name (Domain)                                                                   | Acronym  | First Author/ Year | REF (A) | Generic/ Disease Specific | N of items | Response Options | Recall period | Use | Psychometric Summary |                |             |         |
|---------------------------------------------------------------------------------|----------|--------------------|---------|---------------------------|------------|------------------|---------------|-----|----------------------|----------------|-------------|---------|
|                                                                                 |          |                    |         |                           |            |                  |               |     | Validity             | Discrimination | Feasibility | Overall |
| Bristol Rheumatoid Arthritis Fatigue Multidimensional Questionnaire (Cognition) | BRAF-MDQ | Nicklin J. 2010    | 21      | D                         | 5          | 3, 11            | Past 7 days   | 17  |                      |                |             |         |
| Bristol Rheumatoid Arthritis Fatigue Multidimensional Questionnaire (Emotion)   | BRAF-MDQ | Nicklin J. 2010    | 21      | D                         | 4          | 3, 11            | Past 7 days   | 17  |                      |                |             |         |
| Bristol Rheumatoid Arthritis Fatigue Multidimensional Questionnaire (Living)    | BRAF-MDQ | Nicklin J. 2010    | 21      | D                         | 7          | 3, 11            | Past 7 days   | 17  |                      |                |             |         |
| Bristol Rheumatoid Arthritis Fatigue Multidimensional Questionnaire (Physical)  | BRAF-MDQ | Nicklin J. 2010    | 21      | D                         | 4          | 3, 11            | Past 7 days   | 17  |                      |                |             |         |
| Bristol Rheumatoid Arthritis Fatigue Multidimensional Questionnaire (Total)     | BRAF-MDQ | Nicklin J. 2010    | 21      | D                         | 20         | 3, 11            | Past 7 days   | 17  |                      |                |             |         |
| Chalder Fatigue Scale (Mental fatigue)                                          | CFS      | Chalder T. 1993    | 22      | G                         | 4          | 4                | Last month    | 3   |                      |                |             |         |
| Chalder Fatigue Scale (Physical fatigue)                                        | CFS      | Chalder T. 1993    | 22      | G                         | 7          | 4                | Last month    | 3   |                      |                |             |         |
| Chalder Fatigue Scale (Total)                                                   | CFS      | Chalder T. 1993    | 22      | G                         | 11         | 4                | Last month    | 3   |                      |                |             |         |
| Checklist Individual Strength (Total)                                           | CIS8R    | Vercoulen J. 1994  | 23      | G                         | 8          | 7                | Two weeks     | 10  |                      |                |             |         |
| Functional Assessment of Chronic Illness Therapy Fatigue Scale (Total)          | FACIT-F  | Yellen SB. 1997    | 24      | D*                        | 13         | 5                | Past 7 days   | 55  |                      |                |             |         |

|                                                                                 |                      |                      |    |    |    |       |               |    |  |  |  |  |  |
|---------------------------------------------------------------------------------|----------------------|----------------------|----|----|----|-------|---------------|----|--|--|--|--|--|
| Fatigue Severity Scale (Total)                                                  | FSS                  | Krupp LB. 1989       | 25 | G  | 9  | 7     | Last week     | 18 |  |  |  |  |  |
| Multidimensional Assessment of Fatigue (Intensity)                              | MAF                  | Tack B. 1991         | 26 | D  | 3  | 10    | Past week     | 15 |  |  |  |  |  |
| Multidimensional Assessment of Fatigue (Interference)                           | MAF                  | Tack B. 1991         | 26 | D  | 11 | 10    | Past week     | 15 |  |  |  |  |  |
| Multidimensional Assessment of Fatigue (Total)                                  | MAF                  | Tack B. 1991         | 26 | D  | 15 | 4, 10 | Past week     | 15 |  |  |  |  |  |
| Multi-Dimensional Fatigue Inventory (Total)                                     | MFI                  | Smets E. 1995        | 27 | G  | 20 | 5     | Lately        | 9  |  |  |  |  |  |
| Nottingham Health Profile (Energy)                                              | NHP                  | Hunt SM. 1985        | 8  | D* | 3  | 2     | At the moment | 38 |  |  |  |  |  |
| Profile of Mood States - Fatigue (Total)                                        | POMS-Fatigue         | McNair DM. 1971      | 28 | G  | 7  | 5     | Past week     | 6  |  |  |  |  |  |
| Patient-Reported Outcomes Measurement Information System Fatigue SF 4a (Total)  | PROMIS Fatigue 4a-SF | Bingham III CO. 2019 | 29 | D* | 4  | 5     | Past 7 days   | 1  |  |  |  |  |  |
| Patient-Reported Outcomes Measurement Information System Fatigue SF 7a (Total)  | PROMIS Fatigue 7a-SF | Bingham III CO. 2019 | 30 | D* | 7  | 5     | Past 7 days   | 2  |  |  |  |  |  |
| Patient-Reported Outcomes Measurement Information System Fatigue SF 8a (Total)  | PROMIS Fatigue 8a-SF | Bingham III CO. 2019 | 31 | D* | 8  | 5     | Past 7 days   | 2  |  |  |  |  |  |
| Patient-Reported Outcomes Measurement Information System – 29 Profile (Fatigue) | PROMIS-29-Profile    | Hinchcliff M. 2011   | 11 | G  | 4  | 5     | 7 days        | 2  |  |  |  |  |  |
| RAND 36-Item Health Survey (Vitality)                                           | RAND-36              | Hays RD. 1993        | 13 | G  | 4  | 6     | Past 4 weeks  | 20 |  |  |  |  |  |

|                                                      |       |               |    |    |   |   |              |     |  |  |  |  |  |
|------------------------------------------------------|-------|---------------|----|----|---|---|--------------|-----|--|--|--|--|--|
| Medical Outcomes Study Short Form 36-Item (Vitality) | SF-36 | Ware JE. 1992 | 18 | D* | 4 | 5 | Past 4 weeks | 562 |  |  |  |  |  |
| Subjective Vitality Scale (Total)                    | SVS   | Ryan RM. 1997 | 32 | D* | 7 | 7 | Now          | 1   |  |  |  |  |  |

Evidence: **Strong**; **Moderate**; **Weak**; **Absent**

**Supplementary Table 3: General characteristics and summary psychometric review of all versions of identified PROMs:**  
*Stiffness (b780)*

| Name<br>(Domain)                                                                                             | Acronym | First Author/<br>Year | REF<br>(A) | Generic/<br>Disease<br>Specific | N of<br>items | Response<br>Options | Recall<br>period | Use | Psychometric Summary |                |             |         |            |
|--------------------------------------------------------------------------------------------------------------|---------|-----------------------|------------|---------------------------------|---------------|---------------------|------------------|-----|----------------------|----------------|-------------|---------|------------|
|                                                                                                              |         |                       |            |                                 |               |                     |                  |     | Validity             | Discrimination | Feasibility | Overall |            |
| Score for Assessment<br>and Quantification of<br>Chronic Rheumatic<br>Affections of the Hands<br>(Stiffness) | SACRAH  | Leeb B.<br>2003       | 16         | D                               | 2             | 0-100               | 48 hours         | 2   | Light Blue           | Light Blue     | Green       | Black   | Light Blue |
| Western Ontario<br>McMaster Osteoarthritis<br>Index<br>(Stiffness)                                           | WOMAC   | Bellamy N.<br>1988    | 20         | G                               | 2             | 5                   | Currently        | 57  | Red                  | Red            | Yellow      | Black   | Red        |

Evidence: **Strong**; **Moderate**; **Weak**; **Absent**

**Supplementary Table 4: General characteristics and summary psychometric review of all versions of identified PROMs:****Emotional functions and mental health (b152, b126)**

| Name (Domain)                                                                                          | Acronym  | First Author/ Year | REF (A) | Generic/ Disease Specific | N of items | Response Options | Recall period | Use | Psychometric Summary |                |             |         |
|--------------------------------------------------------------------------------------------------------|----------|--------------------|---------|---------------------------|------------|------------------|---------------|-----|----------------------|----------------|-------------|---------|
|                                                                                                        |          |                    |         |                           |            |                  |               |     | Validity             | Discrimination | Feasibility | Overall |
| Arthritis Impact Measurement Scales (Anxiety)                                                          | AIMS     | Meenan RF. 1980    | 1       | D*                        | 6          | 2-6              | Past month    | 8   |                      |                |             |         |
| Arthritis Impact Measurement Scales (Depression)                                                       | AIMS     | Meenan RF. 1980    | 1       | D*                        | 6          | 2-6              | Past month    | 8   |                      |                |             |         |
| Arthritis Impact Measurement Scales 2 (Mood)                                                           | AIMS2    | Meenan RF. 1992    | 2       | D                         | 5          | 5                | Past month    | 52  |                      |                |             |         |
| Arthritis Impact Measurement Scales 2 (Level of tension)                                               | AIMS2    | Meenan RF. 1992    | 2       | D                         | 5          | 5                | Past month    | 52  |                      |                |             |         |
| Arthritis Impact Measurement Scales 2-SF (Affect)                                                      | AIMS2-SF | Guillemin F. 1997  | 33      | D                         | 5          | 5                | Past 4 weeks  | 14  |                      |                |             |         |
| Center for Epidemiologic Studies Depression Scale (Total)                                              | CES-D    | Radloff LS. 1977   | 34      | G                         | 20         | 4                | Past week     | 28  |                      |                |             |         |
| Cedars-Sinai Health-Related Quality of Life for Rheumatoid Arthritis Instrument (Emotional well-being) | CSHQ-RA  | Weisman MH. 2003   | 35      | D                         | 8          | 5                | Past 4 weeks  | 5   |                      |                |             |         |
| Depression, Anxiety and Stress Scale (Anxiety)                                                         | DASS     | Lovibond SH. 1995  | 36      | G                         | 14         | 4                | Past week     | 3   |                      |                |             |         |
| Depression, Anxiety and Stress Scale (Depression)                                                      | DASS     | Lovibond SH. 1995  | 36      | G                         | 14         | 4                | Past week     | 3   |                      |                |             |         |
| Depression, Anxiety and Stress Scale (Stress)                                                          | DASS     | Lovibond SH. 1995  | 36      | G                         | 14         | 4                | Past week     | 3   |                      |                |             |         |
| Emotional Intimacy Scale (Total)                                                                       | EIS      | Sinclair VG. 2005  | 37      | D                         | 5          | 5                | Currently     | 1   |                      |                |             |         |

|                                                                                    |                   |                    |    |    |   |   |               |     |  |  |  |  |  |
|------------------------------------------------------------------------------------|-------------------|--------------------|----|----|---|---|---------------|-----|--|--|--|--|--|
| Hospital Anxiety and Depression Scale (Anxiety)                                    | HADS              | Zigmond AS. 1983   | 38 | G  | 7 | 4 | Past week     | 81  |  |  |  |  |  |
| Hospital Anxiety and Depression Scale (Depression)                                 | HADS              | Zigmond AS. 1983   | 38 | G  | 7 | 4 | Past week     | 81  |  |  |  |  |  |
| Nottingham Health Profile (Emotional reactions)                                    | NHP               | Hunt SM. 1985      | 8  | D* | 9 | 2 | At the moment | 38  |  |  |  |  |  |
| Nottingham Health Profile (Social isolation)                                       | NHP               | Hunt SM. 1985      | 8  | D* | 5 | 2 | At the moment | 38  |  |  |  |  |  |
| Patient-Reported Outcomes Measurement Information System – 29 Profile (Anxiety)    | PROMIS-29-Profile | Hinchcliff M. 2011 | 11 | G  | 4 | 5 | 7 days        | 2   |  |  |  |  |  |
| Patient-Reported Outcomes Measurement Information System – 29 Profile (Depression) | PROMIS-29-Profile | Hinchcliff M. 2011 | 11 | G  | 4 | 5 | 7 days        | 2   |  |  |  |  |  |
| Psychological Vulnerability Scale (Total)                                          | PVS               | Sinclair VG. 1999  | 39 | D  | 6 | 5 | Not specified | 1   |  |  |  |  |  |
| RAND 36-Item Health Survey (Emotional well-being)                                  | RAND-36           | Hays RD. 1993      | 13 | G  | 5 | 6 | Past 4 weeks  | 20  |  |  |  |  |  |
| RAND 36-Item Health Survey (Role emotional)                                        | RAND-36           | Hays RD. 1993      | 13 | G  | 3 | 2 | Past 4 weeks  | 20  |  |  |  |  |  |
| Medical Outcomes Study Short Form 36-Item (Mental Health)                          | SF-36             | Ware JE. 1992      | 18 | D* | 5 | 5 | Past 4 weeks  | 562 |  |  |  |  |  |
| Medical Outcomes Study Short Form 36-Item (Role-Emotional)                         | SF-36             | Ware JE. 1992      | 18 | D* | 3 | 5 | Past 4 weeks  | 562 |  |  |  |  |  |
| World Health Organisation Quality of Life Instrument Short Form (Psychological)    | WHOQoL-Bref       | Harper H. 1998     | 40 | D* | 6 | 5 | Past 4 weeks  | 15  |  |  |  |  |  |

Evidence: Strong; Moderate; Weak; Absent

**Supplementary Table 5: General characteristics and summary psychometric review of all versions of identified PROMs:  
Sleep (b134)**

| Name (Domain)                                                                             | Acronym           | First Author/ Year | REF (A) | Generic/ Disease Specific | N of items | Response Options | Recall period | Use | Psychometric Summary |                |             |         |  |
|-------------------------------------------------------------------------------------------|-------------------|--------------------|---------|---------------------------|------------|------------------|---------------|-----|----------------------|----------------|-------------|---------|--|
|                                                                                           |                   |                    |         |                           |            |                  |               |     | Validity             | Discrimination | Feasibility | Overall |  |
| Athens Insomnia Scale (Total)                                                             | AIS               | Soldatos CR. 2000  | 41      | G                         | 8          | 4                | Last month    | 7   |                      |                |             |         |  |
| Jenkins Sleep Evaluation Scale (Total)                                                    | JSS               | Jenkins DC. 1988   | 42      | G                         | 4          | 6                | 30 days       | 1   |                      |                |             |         |  |
| Medical Outcomes Study Sleep Questionnaire (Sleep disturbance scale)                      | MOS-Sleep         | Hays RD. 1992      | 43      | G                         | 4          | 5-6              | Past 4 weeks  | 12  |                      |                |             |         |  |
| Nottingham Health Profile (Sleep)                                                         | NHP               | Hunt SM. 1985      | 8       | D*                        | 5          | 2                | At the moment | 38  |                      |                |             |         |  |
| Patient-Reported Outcomes Measurement Information System – 29 Profile (Sleep Disturbance) | PROMIS-29-Profile | Hinchcliff M. 2011 | 11      | G                         | 4          | 5                | 7 days        | 2   |                      |                |             |         |  |

Evidence: Strong; Moderate; Weak; Absent

**Supplementary Table 6: General characteristics and summary psychometric review of all versions of identified PROMs:**  
**Composite/Other symptoms (Impairments) (b, s)**

| Name (Domain)                                                           | Acronym  | First Author/ Year | REF (A) | Generic/ Disease Specific | N of items | Response Options | Recall period                      | Use | Psychometric Summary |                |             |         |  |
|-------------------------------------------------------------------------|----------|--------------------|---------|---------------------------|------------|------------------|------------------------------------|-----|----------------------|----------------|-------------|---------|--|
|                                                                         |          |                    |         |                           |            |                  |                                    |     | Validity             | Discrimination | Feasibility | Overall |  |
| Arthritis Body Experience Scale (Body Physical Function)                | ABES     | Williams B. 2001   | 44      | G                         | 2          | 10               | Not specified                      | 1   |                      |                |             |         |  |
| Arthritis Body Experience Scale (Body Self Consciousness)               | ABES     | Williams B. 2001   | 44      | G                         | 3          | 10               | Not specified                      | 1   |                      |                |             |         |  |
| Arthritis Body Experience Scale (Body Totality)                         | ABES     | Williams B. 2001   | 44      | G                         | 4          | 10               | Not specified                      | 1   |                      |                |             |         |  |
| Arthritis Impact Measurement Scales 2-SF (Symptoms: Pain and stiffness) | AIMS2-SF | Guillemin F. 1997  | 33      | D                         | 3          | 5                | Past 4 weeks                       | 14  |                      |                |             |         |  |
| Foot Impact Scale (Impairment Footwear)                                 | FIS      | Helliwell P. 2005  | 45      | D                         | 21         | 2                | At the moment                      | 20  |                      |                |             |         |  |
| Michigan Hand Outcomes Questionnaire (Aesthetics)                       | MHQ      | Chung KC. 1998     | 6       | D*                        | 4          | 5                | Past week                          | 37  |                      |                |             |         |  |
| Perceived Deficits Questionnaire - Short Form (Total)                   | PDQ-SF   | Sullivan JJ. 1990  | 46      | G                         | 5          | 5                | Past week                          | 1   |                      |                |             |         |  |
| Rheumatoid Arthritis Disease Activity Index-5                           | RADAI-5  | Leeb BF.           | 47      | D                         | 5          | 0-10             | 6 months, today, yesterday morning | 13  |                      |                |             |         |  |
| Rheumatoid and Arthritis Outcome Score (Symptoms)                       | RAOS     | Bremander AB. 2003 | 14      | D                         | 7          | 5                | Last week                          | 6   |                      |                |             |         |  |

|                                                                |        |                  |    |    |   |     |            |    |  |  |  |  |  |
|----------------------------------------------------------------|--------|------------------|----|----|---|-----|------------|----|--|--|--|--|--|
| Rheumatoid Arthritis Symptom Questionnaire (Total)             | RASQ   | Banderas B. 2017 | 48 | D  | 8 | 11  | 7 days     | 2  |  |  |  |  |  |
| Self-Administered Foot Evaluation Questionnaire (Shoe Related) | SAFE-Q | Niki H. 2011     | 17 | D* | 3 | 5   | Past week  | 8  |  |  |  |  |  |
| Medical Outcomes Study Short Form 12-Item (Mental component)   | SF-12  | Ware JE. 1996    | 49 | G  | 6 | 2-6 | Four weeks | 44 |  |  |  |  |  |

Evidence: **Strong**; **Moderate**; **Weak**; **Absent**

**Supplementary Table 7: General characteristics and summary psychometric review of all versions of identified PROMs:****Mobility (d4)**

| Name (Domain)                                                                               | Acronym | First Author/ Year | REF (A) | Generic/ Disease Specific | N of items | Response Options | Recall period | Use | Psychometric Summary |                |             |         |
|---------------------------------------------------------------------------------------------|---------|--------------------|---------|---------------------------|------------|------------------|---------------|-----|----------------------|----------------|-------------|---------|
|                                                                                             |         |                    |         |                           |            |                  |               |     | Validity             | Discrimination | Feasibility | Overall |
| Arthritis Impact Measurement Scales (Dexterity)                                             | AIMS    | Meenan RF. 1980    | 1       | D*                        | 5          | 2-6              | Past month    | 8   |                      |                |             |         |
| Arthritis Impact Measurement Scales (Mobility)                                              | AIMS    | Meenan RF. 1980    | 1       | D*                        | 4          | 2-6              | Past month    | 8   |                      |                |             |         |
| Arthritis Impact Measurement Scales (Physical activity)                                     | AIMS    | Meenan RF. 1980    | 1       | D*                        | 5          | 2-6              | Past month    | 8   |                      |                |             |         |
| Arthritis Impact Measurement Scales 2 (Arm function)                                        | AIMS2   | Meenan RF. 1992    | 2       | D                         | 5          | 5                | Past month    | 52  |                      |                |             |         |
| Arthritis Impact Measurement Scales 2 (Hand and finger function)                            | AIMS2   | Meenan RF. 1992    | 2       | D                         | 5          | 5                | Past month    | 52  |                      |                |             |         |
| Arthritis Impact Measurement Scales 2 (Mobility level)                                      | AIMS2   | Meenan RF. 1992    | 2       | D                         | 5          | 5                | Past month    | 52  |                      |                |             |         |
| Arthritis Impact Measurement Scales 2 (Walking and bending)                                 | AIMS2   | Meenan RF. 1992    | 2       | D                         | 5          | 5                | Past month    | 52  |                      |                |             |         |
| Australian/Canadian Hand Osteoarthritis Index (Function)                                    | AUSCAN  | Bellamy N. 2002    | 3       | D*                        | 9          | 5                | 48 hours      | 2   |                      |                |             |         |
| Cedars-Sinai Health-Related Quality of Life for Rheumatoid Arthritis Instrument (Dexterity) | CSHQ-RA | Weisman MH. 2003   | 35      | D                         | 7          | 5                | Past 4 weeks  | 5   |                      |                |             |         |
| Cedars-Sinai Health-Related Quality of Life for Rheumatoid Arthritis Instrument (Mobility)  | CSHQ-RA | Weisman MH. 2003   | 35      | D                         | 8          | 5                | Past 4 weeks  | 5   |                      |                |             |         |

|                                                                               |           |                      |    |    |    |    |               |    |  |  |  |  |  |
|-------------------------------------------------------------------------------|-----------|----------------------|----|----|----|----|---------------|----|--|--|--|--|--|
| Evaluation of daily activity questionnaire (Moving & transfers)               | EDAQ      | Nordenskiöld U. 1996 | 50 | D  | 6  | 4  | Last 2 weeks  | 3  |  |  |  |  |  |
| Evaluation of daily activity questionnaire (Moving around indoors)            | EDAQ      | Nordenskiöld U. 1996 | 50 | D  | 12 | 4  | Last 2 weeks  | 3  |  |  |  |  |  |
| Foot Function Index (Disability)                                              | FFI       | Budiman-Mak E. 1991  | 4  | D  | 9  | 10 | Past week     | 35 |  |  |  |  |  |
| Foot Health Status Questionnaire (Foot function)                              | FHSQ      | Bennett PJ. 1998     | 5  | G  | 4  | 5  | Past week     | 4  |  |  |  |  |  |
| Foot Impact Scale (Activities-Participation)                                  | FIS       | Helliwell P. 2005    | 45 | D  | 30 | 2  | At the moment | 20 |  |  |  |  |  |
| International Physical Activity Questionnaire Short Form (Total)              | IPAQ-SF   | Craig CL. 2003       | 51 | G  | 7  | 3  | Last 7 days   | 1  |  |  |  |  |  |
| Michigan Hand Outcomes Questionnaire (Overall hand function)                  | MHQ       | Chung KC. 1998       | 6  | D* | 5  | 5  | Past week     | 37 |  |  |  |  |  |
| Rheumatoid and Arthritis Outcome Score (Sports/Recreation)                    | RAOS      | Bremander AB. 2003   | 14 | D  | 5  | 5  | Last week     | 6  |  |  |  |  |  |
| Recent-Onset Arthritis Disability Index (Lower extremity function)            | ROAD      | Salaffi F. 2005      | 52 | D  | 4  | 5  | One week      | 6  |  |  |  |  |  |
| Recent-Onset Arthritis Disability Index (Upper extremity function)            | ROAD      | Salaffi F. 2005      | 52 | D  | 5  | 5  | One week      | 6  |  |  |  |  |  |
| World Health Organisation Disability Assessment Schedule –II (Getting around) | WHODAS-II | WHO 2004             | 53 | G  | 5  | 5  | Last 30 days  | 5  |  |  |  |  |  |

Evidence: Strong; Moderate; Weak; Absent

**Supplementary Table 8: General characteristics and summary psychometric review of all versions of identified PROMs:  
Self-Care (d5)**

| Name (Domain)                                                                | Acronym | First Author/ Year   | REF (A) | Generic/ Disease Specific | N of items | Response Options | Recall period | Use | Psychometric Summary |                |             |         |
|------------------------------------------------------------------------------|---------|----------------------|---------|---------------------------|------------|------------------|---------------|-----|----------------------|----------------|-------------|---------|
|                                                                              |         |                      |         |                           |            |                  |               |     | Validity             | Discrimination | Feasibility | Overall |
| Arthritis Impact Measurement Scales 2 (Self-care)                            | AIMS2   | Meenan RF. 1992      | 2       | D                         | 4          | 5                | Past month    | 52  | Yellow               | Yellow         | Green       | Yellow  |
| Compliance Questionnaire-Rheumatology (Total)                                | CQR     | de Klerk E. 1999     | 54      | G                         | 19         | 4                | Not specified | 23  | Blue                 | Blue           | Blue        | Blue    |
| Compliance Questionnaire-Rheumatology - 5 Item Version (Total)               | CQR-5   | Hughes LD. 2013      | 55      | D                         | 5          | 4                | Not specified | 3   | Yellow               | Blue           | Blue        | Blue    |
| Evaluation of daily activity questionnaire (Bathing/showering)               | EDAQ    | Nordenskiöld U. 1996 | 50      | D                         | 11         | 4                | Last 2 weeks  | 3   | Blue                 | Green          | Blue        | Blue    |
| Evaluation of daily activity questionnaire (Eating/drinking)                 | EDAQ    | Nordenskiöld U. 1996 | 50      | D                         | 10         | 4                | Last 2 weeks  | 3   | Blue                 | Yellow         | Blue        | Blue    |
| Evaluation of daily activity questionnaire (Getting dressed/undressed)       | EDAQ    | Nordenskiöld U. 1996 | 50      | D                         | 11         | 4                | Last 2 weeks  | 3   | Blue                 | Green          | Blue        | Blue    |
| Evaluation of daily activity questionnaire (In the bathroom / personal care) | EDAQ    | Nordenskiöld U. 1996 | 50      | D                         | 12         | 4                | Last 2 weeks  | 3   | Blue                 | Green          | Blue        | Blue    |
| Medication Adherence Report Scale-5 (Total)                                  | MARS-5  | Horne R. 2002        | 56      | G                         | 5          | 5                | Not specified | 6   | Red                  | Blue           | Green       | Red     |
| Medication Adherence Report Scale-9 (Total)                                  | MARS-9  | Salt E. 2012         | 57      | G                         | 9          | 5                | Not specified | 1   | Blue                 | Blue           | Yellow      | Blue    |
| Medication Adherence Scale (Total)                                           | MAS     | Morisky DE. 1986     | 58      | G                         | 4          | 2                | Not specified | 10  | Blue                 | Red            | Green       | Red     |

|                                                                          |           |                        |    |   |   |   |               |   |  |  |  |  |  |
|--------------------------------------------------------------------------|-----------|------------------------|----|---|---|---|---------------|---|--|--|--|--|--|
| Shoulder Function Assessment Scale (ADL)                                 | SFA       | Ende van den CHM. 1996 | 59 | D | 4 | 5 | Not specified | 3 |  |  |  |  |  |
| World Health Organisation Disability Assessment Schedule –II (Self-care) | WHODAS-II | WHO 2004               | 53 | G | 4 | 5 | Last 30 days  | 5 |  |  |  |  |  |

Evidence: **Strong**; **Moderate**; **Weak**; **Absent**

**Supplementary Table 9: General characteristics and summary psychometric review of all versions of identified PROMs:***Domestic (d6)*

| Name (Domain)                                                                  | Acronym | First Author/ Year   | REF (A) | Generic/ Disease Specific | N of items | Response Options | Recall period | Use | Psychometric Summary |                |             |         |
|--------------------------------------------------------------------------------|---------|----------------------|---------|---------------------------|------------|------------------|---------------|-----|----------------------|----------------|-------------|---------|
|                                                                                |         |                      |         |                           |            |                  |               |     | Validity             | Discrimination | Feasibility | Overall |
| Arthritis Impact Measurement Scales (Household activity)                       | AIMS    | Meenan RF. 1980      | 1       | D*                        | 7          | 2-6              | Past month    | 8   | Strong               | Strong         | Strong      | Strong  |
| Arthritis Impact Measurement Scales 2 (Household tasks)                        | AIMS2   | Meenan RF. 1992      | 2       | D                         | 4          | 5                | Past month    | 52  | Strong               | Strong         | Moderate    | Strong  |
| Evaluation of daily activity questionnaire (Caring)                            | EDAQ    | Nordenskiöld U. 1996 | 50      | D                         | 9          | 4                | Last 2 weeks  | 3   | Strong               | Strong         | Strong      | Strong  |
| Evaluation of daily activity questionnaire (Cleaning the house)                | EDAQ    | Nordenskiöld U. 1996 | 50      | D                         | 9          | 4                | Last 2 weeks  | 3   | Strong               | Moderate       | Strong      | Strong  |
| Evaluation of daily activity questionnaire (Cooking)                           | EDAQ    | Nordenskiöld U. 1996 | 50      | D                         | 14         | 4                | Last 2 weeks  | 3   | Strong               | Moderate       | Strong      | Strong  |
| Evaluation of daily activity questionnaire (Gardening & household maintenance) | EDAQ    | Nordenskiöld U. 1996 | 50      | D                         | 7          | 4                | Last 2 weeks  | 3   | Strong               | Strong         | Strong      | Strong  |
| Evaluation of daily activity questionnaire (Laundry & clothes care)            | EDAQ    | Nordenskiöld U. 1996 | 50      | D                         | 9          | 4                | Last 2 weeks  | 3   | Strong               | Moderate       | Strong      | Strong  |

Evidence: Strong; Moderate; Weak; Absent

**Supplementary Table 10: General characteristics and summary psychometric review of all versions of identified PROMs:***Work (d840-d859)*

| Name<br>(Domain)                                                       | Acronym  | First Author/<br>Year | REF<br>(A) | Generic/<br>Disease<br>Specific | N of<br>items | Response<br>Options | Recall<br>period | Use | Psychometric Summary |                |             |         |
|------------------------------------------------------------------------|----------|-----------------------|------------|---------------------------------|---------------|---------------------|------------------|-----|----------------------|----------------|-------------|---------|
|                                                                        |          |                       |            |                                 |               |                     |                  |     | Validity             | Discrimination | Feasibility | Overall |
| Arthritis Impact<br>Measurement Scales 2<br>(Work)                     | AIMS2    | Meenan RF.<br>1992    | 2          | D                               | 5             | 5                   | Past<br>month    | 52  |                      |                |             |         |
| Arthritis Impact<br>Measurement Scales 2-<br>SF<br>(Work)              | AIMS2-SF | Guillemin F.<br>1997  | 33         | D                               | 2             | 5                   | Past 4<br>weeks  | 14  |                      |                |             |         |
| Endicott Work<br>Productivity Scale<br>(Total)                         | EWPS     | Endicott J.<br>1997   | 60         | G                               | 25            | 5                   | One<br>week      | 2   |                      |                |             |         |
| Michigan Hand<br>Outcomes Questionnaire<br>(Work performance)          | MHQ      | Chung KC.<br>1998     | 6          | D*                              | 5             | 5                   | Past<br>week     | 37  |                      |                |             |         |
| Rheumatoid Arthritis<br>Work Instability Scale<br>(Total)              | RA-WIS   | Gilworth G.<br>2003   | 61         | D                               | 23            | 2                   | At the<br>moment | 22  |                      |                |             |         |
| Stanford Presenteeism<br>Scale<br>(Total)                              | SPS-6    | Koopman C.<br>2002    | 62         | G                               | 6             | 5                   | Past<br>month    | 3   |                      |                |             |         |
| Valuation of Lost<br>Productivity<br>Questionnaire<br>(Total)          | VOLP     | Zhang W.<br>2011      | 63         | D                               | 6             | 2-6                 | Currently        | 2   |                      |                |             |         |
| Workplace Activity<br>Limitations Scale<br>(Total)                     | WALS     | Gignac MA.<br>2004    | 64         | G                               | 12            | 4                   | In<br>general    | 4   |                      |                |             |         |
| Work Functioning<br>Impairment Scale<br>(Total)                        | Wfun     | Fujino Y.<br>2015     | 65         | D*                              | 7             | 5                   | Currently        | 2   |                      |                |             |         |
| Work Limitations<br>Questionnaire<br>(Mental-interpersonal<br>demands) | WLQ      | Lerner D.<br>2001     | 66         | D*                              | 9             | 5                   | Past 2<br>weeks  | 17  |                      |                |             |         |

|                                                   |     |                |    |    |    |   |              |    |  |  |  |  |  |
|---------------------------------------------------|-----|----------------|----|----|----|---|--------------|----|--|--|--|--|--|
| Work Limitations Questionnaire (Output demands)   | WLQ | Lerner D. 2001 | 66 | D* | 5  | 5 | Past 2 weeks | 17 |  |  |  |  |  |
| Work Limitations Questionnaire (Physical demands) | WLQ | Lerner D. 2001 | 66 | D* | 6  | 5 | Past 2 weeks | 17 |  |  |  |  |  |
| Work Limitations Questionnaire (Time management)  | WLQ | Lerner D. 2001 | 66 | D* | 5  | 5 | Past 2 weeks | 17 |  |  |  |  |  |
| Work Limitations Questionnaire (Total)            | WLQ | Lerner D. 2001 | 66 | D* | 25 | 5 | Past 2 weeks | 17 |  |  |  |  |  |

Evidence: **Strong**; **Moderate**; **Weak**; **Absent**

**Supplementary Table 11: General characteristics and summary psychometric review of all versions of identified PROMs:***Physical functioning (d3, d4, d5, d6)*

| Name (Domain)                                                                  | Acronym  | First Author/ Year   | REF (A) | Generic/ Disease Specific | N of items | Response Options | Recall period                | Use  | Psychometric Summary |                |             |         |
|--------------------------------------------------------------------------------|----------|----------------------|---------|---------------------------|------------|------------------|------------------------------|------|----------------------|----------------|-------------|---------|
|                                                                                |          |                      |         |                           |            |                  |                              |      | Validity             | Discrimination | Feasibility | Overall |
| ABILHAND (Total)                                                               | ABILHAND | Penta M. 1998        | 67      | G                         | 27         | 3                | Within the last three months | 6    |                      |                |             |         |
| Arthritis Impact Measurement Scales (ADL)                                      | AIMS     | Meenan RF. 1980      | 1       | D*                        | 4          | 2-6              | Past month                   | 8    |                      |                |             |         |
| Arthritis Impact Measurement Scales 2-SF (Physical: Self-care and mobility)    | AIMS2-SF | Guillemin F. 1997    | 33      | D                         | 12         | 5                | Past 4 weeks                 | 14   |                      |                |             |         |
| Cochin Hand Function Scale (Total)                                             | CHFS     | Duruöz M. 1996       | 68      | D                         | 18         | 6                | Not specified                | 16   |                      |                |             |         |
| Disabilities of the Arm, Shoulder and Hand (Total)                             | DASH     | Hudak PL. 1996       | 69      | G                         | 30         | 5                | 1 week                       | 62   |                      |                |             |         |
| Evaluation of daily activity questionnaire (Communication)                     | EDAQ     | Nordenskiöld U. 1996 | 50      | D                         | 6          | 4                | Last 2 weeks                 | 3    |                      |                |             |         |
| Evaluation of daily activity questionnaire (Moving around outdoors / shopping) | EDAQ     | Nordenskiöld U. 1996 | 50      | D                         | 13         | 4                | Last 2 weeks                 | 3    |                      |                |             |         |
| Foot Function Index (Activity Limitation)                                      | FFI      | Budiman-Mak E. 1991  | 4       | D                         | 5          | 10               | Past week                    | 35   |                      |                |             |         |
| Foot Function Index – Revised Short Form (Total)                               | FFI-RS   | Budiman-Mak E. 2006  | 70      | D                         | 34         | 4                | Past week                    | 1    |                      |                |             |         |
| Health Assessment Questionnaire (Total)                                        | HAQ      | Fries JF. 1980       | 71      | D                         | 20         | 4                | Past week                    | 2556 |                      |                |             |         |
| Health Assessment Questionnaire-II (Total)                                     | HAQ-II   | Wolfe F. 2004        | 72      | D                         | 10         | 4                | One week                     | 17   |                      |                |             |         |

|                                                                                           |                   |                    |    |    |    |   |               |     |  |  |  |  |  |
|-------------------------------------------------------------------------------------------|-------------------|--------------------|----|----|----|---|---------------|-----|--|--|--|--|--|
| Joint Protection Behaviour Short Form (Total)                                             | JPBA-S            | Hammond A. 1999    | 73 | D  | 10 | 5 | At the moment | 2   |  |  |  |  |  |
| McMaster Toronto Arthritis Patient Preference Disability Questionnaire (Total)            | MACTAR            | Tugwell P. 1987    | 74 | D  | 5  | 3 | Past 2 weeks  | 11  |  |  |  |  |  |
| Measure of Activity Limitation (Total)                                                    | MAL               | Goodacre L. 2007   | 75 | D  | 15 | 5 | Two weeks     | 1   |  |  |  |  |  |
| Measure of Activity Performance of the Hand (Total)                                       | MAP-HAND          | Paulsen T. 2010    | 76 | D  | 18 | 5 | Last time     | 3   |  |  |  |  |  |
| Multidimensional Health Assessment Questionnaire (Total)                                  | MDHAQ             | Pincus T. 1999     | 77 | D* | 10 | 4 | Past week     | 98  |  |  |  |  |  |
| Modified Health Assessment Questionnaire (Total)                                          | MHAQ              | Pincus T. 1983     | 78 | D* | 8  | 4 | Past week     | 206 |  |  |  |  |  |
| Michigan Hand Outcomes Questionnaire (Activities of daily living)                         | MHQ               | Chung KC. 1998     | 6  | D* | 12 | 5 | Past week     | 37  |  |  |  |  |  |
| Nottingham Health Profile (Physical mobility)                                             | NHP               | Hunt SM. 1985      | 8  | D* | 8  | 2 | At the moment | 38  |  |  |  |  |  |
| Oxford Elbow Score (Function)                                                             | OES               | Dawson J. 2008     | 9  | G  | 4  | 5 | Past 4 weeks  | 4   |  |  |  |  |  |
| Personal Impact Health Assessment Questionnaire (Total)                                   | PI-HAQ            | Hewlett S. 2002    | 79 | D  | 8  | 4 | One week      | 2   |  |  |  |  |  |
| Patient-Reported Outcomes Measurement Information System – 29 Profile (Physical Function) | PROMIS-29-Profile | Hinchcliff M. 2011 | 11 | G  | 4  | 5 | 7 days        | 2   |  |  |  |  |  |

|                                                                                                           |                   |                     |    |    |    |   |              |    |  |  |  |  |  |
|-----------------------------------------------------------------------------------------------------------|-------------------|---------------------|----|----|----|---|--------------|----|--|--|--|--|--|
| Patient-Reported Outcomes Measurement Information System – 29 Profile (Social Roles and Activities)       | PROMIS-29-Profile | Hinchcliff M. 2011  | 11 | G  | 4  | 5 | 7 days       | 2  |  |  |  |  |  |
| Patient-Reported Outcomes Measurement Information System (PROMIS) physical function form (PF-10a) (Total) | PROMIS-PF 10a-SF  | Fries JF. 2009      | 80 | D* | 10 | 5 | Now          | 7  |  |  |  |  |  |
| Patient-Reported Outcomes Measurement Information System (PROMIS) physical function form (PF-20) (Total)  | PROMIS-PF 20-SF   | Fries JF. 2009      | 81 | D* | 20 | 5 | Now          | 5  |  |  |  |  |  |
| Performance and Satisfaction in Activities of Daily Living (Performance)                                  | PS-ADL            | Archenholtz B. 2008 | 82 | D  | 12 | 4 | Past week    | 1  |  |  |  |  |  |
| Performance and Satisfaction in Activities of Daily Living (Satisfaction)                                 | PS-ADL            | Archenholtz B. 2008 | 82 | D  | 12 | 3 | Past week    | 1  |  |  |  |  |  |
| Quick Disabilities of the Arm, Shoulder and Hand (DASH) Questionnaire (Total)                             | QuickDASH         | Hammond A. 2018     | 83 | D* | 11 | 5 | Last Week    | 21 |  |  |  |  |  |
| RAND 36-Item Health Survey (Physical functioning)                                                         | RAND-36           | Hays RD. 1993       | 13 | G  | 10 | 3 | Past 4 weeks | 20 |  |  |  |  |  |
| RAND 36-Item Health Survey (Role physical)                                                                | RAND-36           | Hays RD. 1993       | 13 | G  | 4  | 2 | Past 4 weeks | 20 |  |  |  |  |  |
| Rheumatoid and Arthritis Outcome Score (ADL)                                                              | RAOS              | Bremander AB. 2003  | 14 | D  | 17 | 5 | Last week    | 6  |  |  |  |  |  |

|                                                                                                 |           |                  |    |    |    |       |               |     |  |  |  |  |  |
|-------------------------------------------------------------------------------------------------|-----------|------------------|----|----|----|-------|---------------|-----|--|--|--|--|--|
| Rheumatoid Hand Disability Scale (Total)                                                        | RHDA      | Guermazi M. 2004 | 84 | D  | 10 | 4     | Not specified | 1   |  |  |  |  |  |
| Recent-Onset Arthritis Disability Index (Activities of daily living/work)                       | ROAD      | Salaffi F. 2005  | 52 | D  | 3  | 5     | One week      | 6   |  |  |  |  |  |
| Recent-Onset Arthritis Disability Index (Total)                                                 | ROAD      | Salaffi F. 2005  | 52 | D  | 12 | 5     | One week      | 6   |  |  |  |  |  |
| Score for Assessment and Quantification of Chronic Rheumatic Affections of the Hands (Function) | SACRAH    | Leeb B. 2003     | 16 | D  | 17 | 0-100 | 48 hours      | 2   |  |  |  |  |  |
| Self-Administered Foot Evaluation Questionnaire (Physical Functioning and Daily Living)         | SAFE-Q    | Niki H. 2011     | 17 | D* | 11 | 5     | Past week     | 8   |  |  |  |  |  |
| Medical Outcomes Study Short Form 36-Item (Physical functioning)                                | SF-36     | Ware JE. 1992    | 18 | D* | 10 | 3     | Past 4 weeks  | 562 |  |  |  |  |  |
| Medical Outcomes Study Short Form 36-Item (Role-Physical)                                       | SF-36     | Ware JE. 1992    | 18 | D* | 4  | 5     | Past 4 weeks  | 562 |  |  |  |  |  |
| World Health Organisation Disability Assessment Schedule –II (Life activities)                  | WHODAS-II | WHO 2004         | 53 | G  | 8  | 5     | Last 30 days  | 5   |  |  |  |  |  |
| Western Ontario McMaster Osteoarthritis Index (Function)                                        | WOMAC     | Bellamy N. 1988  | 20 | G  | 17 | 5     | Currently     | 57  |  |  |  |  |  |

Evidence: Strong; Moderate; Weak; Absent

**Supplementary Table 12: General characteristics and summary psychometric review of all versions of identified PROMs:**  
**Social functioning (d7, d8, d9)**

| Name (Domain)                                                                            | Acronym   | First Author/ Year   | REF (A) | Generic/ Disease Specific | N of items | Response Options | Recall period | Use | Psychometric Summary |                |             |         |
|------------------------------------------------------------------------------------------|-----------|----------------------|---------|---------------------------|------------|------------------|---------------|-----|----------------------|----------------|-------------|---------|
|                                                                                          |           |                      |         |                           |            |                  |               |     | Validity             | Discrimination | Feasibility | Overall |
| Arthritis Impact Measurement Scales (Social activity)                                    | AIMS      | Meenan RF. 1980      | 1       | D*                        | 4          | 2-6              | Past month    | 8   |                      |                |             |         |
| Arthritis Impact Measurement Scales 2 (Social activities)                                | AIMS2     | Meenan RF. 1992      | 2       | D                         | 5          | 5                | Past month    | 52  |                      |                |             |         |
| Arthritis Impact Measurement Scales 2-SF (Social)                                        | AIMS2-SF  | Guillemin F. 1997    | 33      | D                         | 4          | 5                | Past 4 weeks  | 14  |                      |                |             |         |
| Evaluation of daily activity questionnaire (Hobbies, leisure & social activities)        | EDAQ      | Nordenskiöld U. 1996 | 50      | D                         | 9          | 4                | Last 2 weeks  | 3   |                      |                |             |         |
| Patient Specific Leisure Scale (Total)                                                   | PSLS      | Wikström I. 2009     | 85      | D                         | 6          | 11               | Today         | 1   |                      |                |             |         |
| RAND 36-Item Health Survey (Social functioning)                                          | RAND-36   | Hays RD. 1993        | 13      | G                         | 2          | 5                | Past 4 weeks  | 20  |                      |                |             |         |
| Self-Administered Foot Evaluation Questionnaire (Social Functioning)                     | SAFE-Q    | Niki H. 2011         | 17      | D*                        | 6          | 5                | Past week     | 8   |                      |                |             |         |
| Medical Outcomes Study Short Form 36-Item (Social Functioning)                           | SF-36     | Ware JE. 1992        | 18      | D*                        | 2          | 5                | Past 4 weeks  | 562 |                      |                |             |         |
| World Health Organisation Disability Assessment Schedule –II (Getting along with people) | WHODAS-II | WHO 2004             | 53      | G                         | 5          | 5                | Last 30 days  | 5   |                      |                |             |         |

|                                                                                         |             |                |    |    |   |   |              |    |  |  |  |  |  |
|-----------------------------------------------------------------------------------------|-------------|----------------|----|----|---|---|--------------|----|--|--|--|--|--|
| World Health Organisation Disability Assessment Schedule –II (Participation in society) | WHODAS-II   | WHO 2004       | 53 | G  | 8 | 5 | Last 30 days | 5  |  |  |  |  |  |
| World Health Organisation Quality of Life Instrument Short Form (Social relationships)  | WHOQoL-Bref | Harper H. 1998 | 40 | D* | 3 | 5 | Past 4 weeks | 15 |  |  |  |  |  |

Evidence: **Strong**; **Moderate**; **Weak**; **Absent**

**Supplementary Table 13: General characteristics and summary psychometric review of all versions of identified PROMs:**  
*Physical and social functioning (Composite: impairments, activities, participation, personal, well-being)*

| Name (Domain)                                                                                             | Acronym    | First Author/ Year  | REF (A) | Generic/ Disease Specific | N of items | Response Options | Recall period | Use | Psychometric Summary |                |             |         |  |
|-----------------------------------------------------------------------------------------------------------|------------|---------------------|---------|---------------------------|------------|------------------|---------------|-----|----------------------|----------------|-------------|---------|--|
|                                                                                                           |            |                     |         |                           |            |                  |               |     | Validity             | Discrimination | Feasibility | Overall |  |
| Patient Reported Outcomes Thermometer (Total)                                                             | 5T-PROs    | Salaffi F. 2018     | 86      | G                         | 5          | 11               | Last Week     | 1   |                      |                |             |         |  |
| Arthritis Impact Measurement Scales (Total)                                                               | AIMS       | Meenan RF. 1980     | 1       | D*                        | 46         | 2-6              | Past month    | 8   |                      |                |             |         |  |
| Cedars-Sinai Health-Related Quality of Life for Rheumatoid Arthritis Instrument (Physical activity)       | CSHQ-RA    | Weisman MH. 2003    | 35      | D                         | 8          | 5                | Past 4 weeks  | 5   |                      |                |             |         |  |
| Cedars-Sinai Health-Related Quality of Life for Rheumatoid Arthritis Instrument (Sexual well-being)       | CSHQ-RA    | Weisman MH. 2003    | 35      | D                         | 2          | 5                | Past 4 weeks  | 5   |                      |                |             |         |  |
| Cedars-Sinai Health-Related Quality of Life for Rheumatoid Arthritis Instrument Short Form (Total)        | CSHQ-RA-SF | Chiou CF. 2004      | 87      | D                         | 11         | 5                | Four weeks    | 2   |                      |                |             |         |  |
| Foot Function Index (Total)                                                                               | FFI        | Budiman-Mak E. 1991 | 4       | D                         | 23         | 10               | Past week     | 35  |                      |                |             |         |  |
| The Flare Instrument (Total)                                                                              | Flare-RA   | Berthelot JM. 2012  | 88      | D                         | 13         | 11               | Last month    | 7   |                      |                |             |         |  |
| Michigan Hand Outcomes Questionnaire (Total)                                                              | MHQ        | Chung KC. 1998      | 6       | D*                        | 37         | 5                | Past week     | 37  |                      |                |             |         |  |
| Modified Score for the Assessment and Quantification of Chronic Rheumatic Affections of the Hands (Total) | M-SACRAH   | Sautner J. 2004     | 89      | D                         | 12         | 0-100            | 48 hours      | 6   |                      |                |             |         |  |

|                                                                                                             |           |                       |    |   |    |       |              |     |  |  |  |  |  |
|-------------------------------------------------------------------------------------------------------------|-----------|-----------------------|----|---|----|-------|--------------|-----|--|--|--|--|--|
| Musculoskeletal Health Questionnaire (Total)                                                                | MSK-HQ    | Hill JC. 2016         | 90 | G | 14 | 5     | Past 2 weeks | 1   |  |  |  |  |  |
| Oxford Elbow Score (Social-psychological)                                                                   | OES       | Dawson J. 2008        | 9  | G | 4  | 5     | Past 4 weeks | 4   |  |  |  |  |  |
| Rheumatoid Arthritis Flare Questionnaire (Total)                                                            | RA-FQ     | Bartlett SJ. 2017     | 91 | D | 5  | 11    | 7 days       | 1   |  |  |  |  |  |
| Rheumatoid Arthritis Impact of Disease (Total)                                                              | RAID      | Gossec L. 2009        | 92 | D | 7  | 11    | Past week    | 39  |  |  |  |  |  |
| Routine Assessment of Patient Index Data 3 (Total)                                                          | RAPID3    | Pincus T. 2009        | 93 | D | 15 | 4/21  | At this time | 113 |  |  |  |  |  |
| Score for Assessment and Quantification of Chronic Rheumatic Affections of the Hands (Total)                | SACRAH    | Leeb B. 2003          | 16 | D | 23 | 0-100 | 48 hours     | 2   |  |  |  |  |  |
| Medical Outcomes Study Short Form 12-Item (Physical component)                                              | SF-12     | Ware JE. 1996         | 49 | G | 6  | 2-6   | Four weeks   | 44  |  |  |  |  |  |
| Short Form Score for the Assessment and Quantification of Chronic Rheumatic Affections of the Hands (Total) | SF-SACRAH | Rintelen B. 2009      | 94 | D | 5  | 11    | Two days     | 3   |  |  |  |  |  |
| Short Musculoskeletal Function Assessment Questionnaire (Bother index)                                      | SMFA      | Swiontkowski MF. 1999 | 95 | G | 12 | 5     | This week    | 2   |  |  |  |  |  |
| Short Musculoskeletal Function Assessment Questionnaire (Function index)                                    | SMFA      | Swiontkowski MF. 1999 | 95 | G | 34 | 5     | This week    | 2   |  |  |  |  |  |

|                                                                                                |             |                |    |    |    |   |               |    |  |  |  |  |  |
|------------------------------------------------------------------------------------------------|-------------|----------------|----|----|----|---|---------------|----|--|--|--|--|--|
| Short Form of The Valued Life Activities Disability Questionnaire (Total)                      | S-VLA       | Katz PP. 2011  | 96 | D  | 14 | 5 | Not specified | 1  |  |  |  |  |  |
| Valued Life Activities Scale (Total)                                                           | VLA         | Katz PP. 2006  | 97 | D  | 33 | 4 | Not specified | 2  |  |  |  |  |  |
| World Health Organisation Disability Assessment Schedule –II (Total)                           | WHODAS-II   | WHO 2004       | 53 | G  | 36 | 5 | Last 30 days  | 5  |  |  |  |  |  |
| World Health Organisation Disability Assessment Schedule –II (Understanding and communicating) | WHODAS-II   | WHO 2004       | 53 | G  | 6  | 5 | Last 30 days  | 5  |  |  |  |  |  |
| World Health Organisation Quality of Life Instrument Short Form (Physical health)              | WHOQoL-Bref | Harper H. 1998 | 40 | D* | 7  | 5 | Past 4 weeks  | 15 |  |  |  |  |  |

Evidence: Strong; Moderate; Weak; Absent

**Supplementary Table 14: General characteristics and summary psychometric review of all versions of identified PROMs:****Environmental factors (e)**

| Name (Domain)                                                                 | Acronym     | First Author/ Year | REF (A) | Generic/ Disease Specific | N of items | Response Options | Recall period | Use | Psychometric Summary |                |             |                |
|-------------------------------------------------------------------------------|-------------|--------------------|---------|---------------------------|------------|------------------|---------------|-----|----------------------|----------------|-------------|----------------|
|                                                                               |             |                    |         |                           |            |                  |               |     | Validity             | Discrimination | Feasibility | Overall        |
| Arthritis Impact Measurement Scales 2 (Support from family and friends)       | AIMS2       | Meenan RF. 1992    | 2       | D                         | 4          | 5                | Past month    | 52  | Strong               | Moderate       | Feasible    | Overall Strong |
| Consumer Quality Index Rheumatoid Arthritis (Total)                           | CQ-Index RA | Zuidgeest M. 2009  | 98      | D                         | 142        | 2-4, 11          | One year      | 1   | Weak                 | Weak           | Absent      | Overall Absent |
| Internalised Stigma of Mental Illness- Rheumatoid Arthritis (Total)           | ISMI-RA     | Corker E. 2016     | 99      | D                         | 29         | 4                | Now           | 2   | Weak                 | Weak           | Strong      | Overall Weak   |
| Person Centred Care in Outpatient Clinics/Rheumatol (Total)                   | PCCoc/rheum | Bala SV. 2018      | 100     | D*                        | 21         | 4                | Not Specified | 2   | Weak                 | Weak           | Feasible    | Overall Weak   |
| Patient-Health Care Provider Communication Scale (Total)                      | PHCPCS      | Salt E. 2013       | 101     | D                         | 21         | 4                | Not specified | 1   | Weak                 | Weak           | Strong      | Overall Weak   |
| World Health Organisation Quality of Life Instrument Short Form (Environment) | WHOQoL-Bref | Harper H. 1998     | 40      | D*                        | 8          | 5                | Past 4 weeks  | 15  | Weak                 | Strong         | Feasible    | Overall Weak   |

Evidence: Strong; Moderate; Weak; Absent

**Supplementary Table 15: General characteristics and summary psychometric review of all versions of identified PROMs:***Personal factors (e.g. self-efficacy, coping)*

| Name (Domain)                                                  | Acronym | First Author/ Year      | REF (A) | Generic/ Disease Specific | N of items | Response Options | Recall period | Use | Psychometric Summary |                |             |         |            |
|----------------------------------------------------------------|---------|-------------------------|---------|---------------------------|------------|------------------|---------------|-----|----------------------|----------------|-------------|---------|------------|
|                                                                |         |                         |         |                           |            |                  |               |     | Validity             | Discrimination | Feasibility | Overall |            |
| Arthritis Helplessness Index (Total)                           | AHI     | Nicassio PM. 1985       | 102     | D                         | 15         | 4                | Present       | 8   | Yellow               | Light Blue     | Yellow      | Black   | Light Blue |
| Arthritis Self-Efficacy Scale (Self-efficacy - other symptoms) | ASES    | Lorig K. 1989           | 103     | G                         | 6          | 10               | At the moment | 25  | Light Blue           | Red            | Green       | Black   | Red        |
| Arthritis Self-Efficacy Scale (Self-efficacy - pain)           | ASES    | Lorig K. 1989           | 103     | G                         | 5          | 10               | At the moment | 25  | Light Blue           | Red            | Green       | Black   | Red        |
| Arthritis Self-Efficacy Scale (Self-efficacy - function)       | ASES    | Lorig K. 1989           | 103     | G                         | 9          | 10               | At the moment | 25  | Light Blue           | Red            | Green       | Black   | Red        |
| Arthritis Self-Efficacy Scale-8 (Total)                        | ASES-8  | Gonzalez VM. 1995       | 104     | D*                        | 8          | 10               | At the moment | 4   | Light Blue           | Light Blue     | Green       | Black   | Light Blue |
| Brief Resilient Coping Scale (Total)                           | BRCS    | Sinclair VG. 2004       | 105     | D                         | 4          | 5                | Not specified | 2   | Light Blue           | Yellow         | Green       | Black   | Light Blue |
| Exercise Self-Efficacy Scale (Total)                           | ESES    | Dzewaltowski D. 1989    | 106     | D*                        | 6          | 10               | At present    | 2   | Light Blue           | Green          | Green       | Black   | Light Blue |
| Joint Protection Self-Efficacy Scale (Total)                   | JP-SES  | Niedermann K. 2011      | 107     | D                         | 10         | 4                | At the moment | 3   | Yellow               | Light Blue     | Yellow      | Black   | Light Blue |
| Rheumatoid Arthritis Empowerment Scale (Total)                 | RAEH    | Contreras-Yáñez I. 2018 | 108     | D*                        | 8          | 5                | Currently     | 1   | Light Blue           | Light Blue     | Green       | Black   | Light Blue |
| Rheumatology Attitudes Index (Total)                           | RAI     | Callahan LF. 1988       | 109     | D                         | 15         | 5                | Not specified | 4   | Light Blue           | Red            | Light Blue  | Black   | Red        |
| Rheumatoid Arthritis Self Efficacy Scale (Total)               | RASE    | Hewlett S. 2001         | 110     | D                         | 28         | 5                | At the moment | 11  | Yellow               | Yellow         | Yellow      | Black   | Yellow     |

|                                                       |      |                         |     |    |    |    |               |   |  |  |  |  |  |
|-------------------------------------------------------|------|-------------------------|-----|----|----|----|---------------|---|--|--|--|--|--|
| Risk Perception Questionnaire (Total)                 | RPQ  | Contreras-Yáñez I. 2019 | 111 | D  | 27 | 11 | Currently     | 1 |  |  |  |  |  |
| Self-Care Behaviours Scale (Total)                    | SCBS | Nadrian H. 2019         | 112 | D  | 25 | 5  | Past year     | 1 |  |  |  |  |  |
| Self-Injection Assessment Questionnaire (PRE Module)  | SIAQ | Keininger D. 2011       | 113 | D* | 7  | 5  | At the moment | 3 |  |  |  |  |  |
| Self-Injection Assessment Questionnaire (POST module) | SIAQ | Keininger D. 2011       | 113 | D* | 21 | 5  | At the moment | 3 |  |  |  |  |  |
| Vanderbilt Pain Management Inventory (Active coping)  | VPMI | Brown GK. 1987          | 114 | D  | 7  | 4  | Not specified | 2 |  |  |  |  |  |
| Vanderbilt Pain Management Inventory (Passive coping) | VPMI | Brown GK. 1987          | 114 | D  | 11 | 4  | Not specified | 2 |  |  |  |  |  |

Evidence: **Strong**; **Moderate**; **Weak**; **Absent**

**Supplementary Table 16: General characteristics and summary psychometric review of all versions of identified PROMs:***Education (knowledge and needs)*

| Name (Domain)                                                 | Acronym | First Author/ Year | REF (A) | Generic/ Disease Specific | N of items | Response Options | Recall period | Use | Psychometric Summary |                |             |         |
|---------------------------------------------------------------|---------|--------------------|---------|---------------------------|------------|------------------|---------------|-----|----------------------|----------------|-------------|---------|
|                                                               |         |                    |         |                           |            |                  |               |     | Validity             | Discrimination | Feasibility | Overall |
| Educational Needs Assessment Tool (Arthritis process)         | ENAT    | Hardware B. 2004   | 115     | D*                        | 7          | 5                | At present    | 11  | Weak                 | Absent         | Moderate    | Absent  |
| Educational Needs Assessment Tool (Feelings)                  | ENAT    | Hardware B. 2004   | 115     | D*                        | 4          | 5                | At present    | 11  | Weak                 | Absent         | Moderate    | Absent  |
| Educational Needs Assessment Tool (Movement)                  | ENAT    | Hardware B. 2004   | 115     | D*                        | 5          | 5                | At present    | 11  | Weak                 | Absent         | Moderate    | Absent  |
| Educational Needs Assessment Tool (Managing pain)             | ENAT    | Hardware B. 2004   | 115     | D*                        | 6          | 5                | At present    | 11  | Weak                 | Absent         | Moderate    | Absent  |
| Educational Needs Assessment Tool (Self-help measures)        | ENAT    | Hardware B. 2004   | 115     | D*                        | 6          | 5                | At present    | 11  | Weak                 | Absent         | Moderate    | Absent  |
| Educational Needs Assessment Tool (Support systems)           | ENAT    | Hardware B. 2004   | 115     | D*                        | 4          | 5                | At present    | 11  | Weak                 | Absent         | Moderate    | Absent  |
| Educational Needs Assessment Tool (Total)                     | ENAT    | Hardware B. 2004   | 115     | D*                        | 39         | 5                | At present    | 11  | Moderate             | Weak           | Moderate    | Weak    |
| Educational Needs Assessment Tool (Treatments)                | ENAT    | Hardware B. 2004   | 115     | D*                        | 7          | 5                | At present    | 11  | Weak                 | Absent         | Moderate    | Absent  |
| Heart Disease Fact Questionnaire-Rheumatoid Arthritis (Total) | HDFQ-RA | John H. 2009       | 116     | D                         | 13         | 2                | At present    | 2   | Moderate             | Weak           | Moderate    | Weak    |
| RA Knowledge Assessment Scale (Total)                         | RA-KAS  | Naqvi AA. 2019     | 117     | D                         | 13         | 2-5              | Current       | 1   | Weak                 | Weak           | Strong      | Weak    |

Evidence: **Strong**; **Moderate**; **Weak**; **Absent**

**Supplementary Table 17: General characteristics and summary psychometric review of all versions of identified PROMs:***Quality of life, including well-being, and general health*

| Name (Domain)                                                                        | Acronym           | First Author/ Year | REF (A) | Generic/ Disease Specific | N of items | Response Options | Recall period            | Use | Psychometric Summary |                |             |         |  |
|--------------------------------------------------------------------------------------|-------------------|--------------------|---------|---------------------------|------------|------------------|--------------------------|-----|----------------------|----------------|-------------|---------|--|
|                                                                                      |                   |                    |         |                           |            |                  |                          |     | Validity             | Discrimination | Feasibility | Overall |  |
| Foot Health Status Questionnaire (Footwear)                                          | FHSQ              | Bennett PJ. 1998   | 5       | G                         | 3          | 5                | Past week                | 4   |                      |                |             |         |  |
| Foot Health Status Questionnaire (General foot health)                               | FHSQ              | Bennett PJ. 1998   | 5       | G                         | 2          | 5                | Past week                | 4   |                      |                |             |         |  |
| Michigan Hand Outcomes Questionnaire (Patient satisfaction with hand function)       | MHQ               | Chung KC. 1998     | 6       | D*                        | 6          | 5                | Past week                | 37  |                      |                |             |         |  |
| Patient-Reported Outcomes Measurement Information System Global Health SF1.1 (Total) | PROMIS-GH v1.1-SF | Hays RD. 2009      | 118     | G                         | 10         | 5/11             | In general / Past 7 days | 1   |                      |                |             |         |  |
| Quality of Life-Rheumatoid Arthritis Scale (Total)                                   | QoL-RA            | Danao LL. 2001     | 119     | D                         | 8          | 10               | Not specified            | 6   |                      |                |             |         |  |
| RAND 36-Item Health Survey (General Health)                                          | RAND-36           | Hays RD. 1993      | 13      | G                         | 5          | 5                | Past 4 weeks             | 20  |                      |                |             |         |  |
| Rheumatoid and Arthritis Outcome Score (QoL)                                         | RAOS              | Bremander AB. 2003 | 14      | D                         | 4          | 5                | Last week                | 6   |                      |                |             |         |  |
| Rheumatoid Arthritis Quality of Life Scale (Total)                                   | RAQoL             | De Jong Z. 1997    | 120     | D                         | 30         | 2                | At the moment            | 58  |                      |                |             |         |  |
| Self-Administered Foot Evaluation Questionnaire (General Health and Well-Being)      | SAFE-Q            | Niki H. 2011       | 17      | D*                        | 5          | 5                | Past week                | 8   |                      |                |             |         |  |

|                                                                  |       |                  |    |    |   |   |                 |     |  |  |  |  |  |
|------------------------------------------------------------------|-------|------------------|----|----|---|---|-----------------|-----|--|--|--|--|--|
| Medical Outcomes Study<br>Short Form 36-Item<br>(General Health) | SF-36 | Ware JE.<br>1992 | 18 | D* | 5 | 5 | Past 4<br>weeks | 562 |  |  |  |  |  |
|------------------------------------------------------------------|-------|------------------|----|----|---|---|-----------------|-----|--|--|--|--|--|

Evidence: **Strong**; **Moderate**; **Weak**; **Absent**

**Supplementary Table 18: General characteristics and summary psychometric review of all versions of identified PROMs:****Health utilities**

| Name (Domain)                                | Acronym | First Author/ Year | REF (A) | Generic/ Disease Specific | N of items | Response Options | Recall period        | Use | Psychometric Summary |                |             |         |            |
|----------------------------------------------|---------|--------------------|---------|---------------------------|------------|------------------|----------------------|-----|----------------------|----------------|-------------|---------|------------|
|                                              |         |                    |         |                           |            |                  |                      |     | Validity             | Discrimination | Feasibility | Overall |            |
| EuroQol (Utility)                            | EQ-5D   | Hurst N. 1994      | 121     | D*                        | 5          | 3, 5             | Today                | 239 | Light Blue           | Yellow         | Green       | Black   | Light Blue |
| Health Utilities Index-2 (Index)             | HUI-2   | Torrance GW. 1996  | 122     | G                         | 7          | 3-5              | 1/2/4 weeks or usual | 6   | Light Blue           | Yellow         | Yellow      | Black   | Light Blue |
| Health Utilities Index-3 (Index)             | HUI-3   | Feeny D. 2002      | 123     | G                         | 8          | 5-6              | 1/2/4 weeks or usual | 6   | Light Blue           | Yellow         | Yellow      | Black   | Light Blue |
| Quality of Well-Being Scale (Index)          | QWB     | Kaplan RM. 1997    | 124     | G                         | 74         | 2-4              | Three days           | 3   | Red                  | Red            | Light Blue  | Black   | Red        |
| Medical Outcomes Study Short Form 6D (Total) | SF-6D   | Brazier J. 2002    | 125     | D*                        | 11         | 4-6              | 1 week or 4 weeks    | 54  | Light Blue           | Yellow         | Green       | Black   | Light Blue |

Evidence: Strong; Moderate; Weak; Absent
