# Supplementary material for: Use and detailed metric properties of patient-reported outcome measures for rheumatoid arthritis: a systematic review covering two decades
Source: PubMed Central journal article supplement (PMC8356163; doi:10.1136/rmdopen-2021-001707), 2021-08-10
Supplement: rmdopen-2021-001707supp004.pdf [file rmdopen-2021-001707supp004.pdf]

| #                          | Scale Acronym                                                                                                                                                                     | Authors                   | Title                                                                                                                                                                              | Journal                      | Year                                                                                                                                                                                | Volume                    | Page                                                                                                                                                                          |                           |                                                                                                                                                             |                           |                                                                                                                                                                                   |                              |          |       |          |
|----------------------------|-----------------------------------------------------------------------------------------------------------------------------------------------------------------------------------|---------------------------|------------------------------------------------------------------------------------------------------------------------------------------------------------------------------------|------------------------------|-------------------------------------------------------------------------------------------------------------------------------------------------------------------------------------|---------------------------|-------------------------------------------------------------------------------------------------------------------------------------------------------------------------------|---------------------------|-------------------------------------------------------------------------------------------------------------------------------------------------------------|---------------------------|-----------------------------------------------------------------------------------------------------------------------------------------------------------------------------------|------------------------------|----------|-------|----------|
| 1                          | AIMS                                                                                                                                                                              | Abello-Banfi M, et al.    | Quality of life in rheumatoid arthritis: Validation of a Spanish version of the Arthritis Impact Measurement Scales (Spanish-AIMS)                                                 | J Rheumatol                  | 1994                                                                                                                                                                                | 21(7)                     | 250-255                                                                                                                                                                       |                           |                                                                                                                                                             |                           |                                                                                                                                                                                   |                              |          |       |          |
|                            |                                                                                                                                                                                   | Archenholtz B & Bjelle A  | Evaluation of a Swedish Version of the Arthritis Impact Measurement Scales (AIMS)                                                                                                  | Scand J Rheumatol            | 1995                                                                                                                                                                                | 24(2)                     | 64-68                                                                                                                                                                         |                           |                                                                                                                                                             |                           |                                                                                                                                                                                   |                              |          |       |          |
|                            |                                                                                                                                                                                   | Buchbinder R, et al.      | Which outcome measures should be used in rheumatoid arthritis clinical trials? Clinical and quality-of-life measures' responsiveness to treatment in a randomized controlled trial | Arthritis Rheum              | 1999                                                                                                                                                                                | 38(11)                    | 568-580                                                                                                                                                                       |                           |                                                                                                                                                             |                           |                                                                                                                                                                                   |                              |          |       |          |
|                            |                                                                                                                                                                                   | Coulton CJ, et al.        | An assessment of the Arthritis Impact Measurement Scales in 3 ethnic groups                                                                                                        | J Rheumatol                  | 1989                                                                                                                                                                                | 16(8)                     | 110-115                                                                                                                                                                       |                           |                                                                                                                                                             |                           |                                                                                                                                                                                   |                              |          |       |          |
|                            |                                                                                                                                                                                   | Engelbrecht M, et al.     | Measuring pain and efficacy of pain treatment in inflammatory arthritis: a systematic literature review                                                                            | J Rheumatol                  | 2012                                                                                                                                                                                | Suppl 90                  | 3-10                                                                                                                                                                          |                           |                                                                                                                                                             |                           |                                                                                                                                                                                   |                              |          |       |          |
|                            |                                                                                                                                                                                   | Fitzpatrick R, et al.     | A generic health status instrument in the assessment of rheumatoid arthritis                                                                                                       | Br J Rheumatol               | 1992                                                                                                                                                                                | 31(2)                     | 87-90                                                                                                                                                                         |                           |                                                                                                                                                             |                           |                                                                                                                                                                                   |                              |          |       |          |
|                            |                                                                                                                                                                                   | Fitzpatrick R, et al.     | Importance of sensitivity to change as a criterion for selecting health status measures                                                                                            | Qual Health Care             | 1992                                                                                                                                                                                | 1(2)                      | 89-93                                                                                                                                                                         |                           |                                                                                                                                                             |                           |                                                                                                                                                                                   |                              |          |       |          |
|                            |                                                                                                                                                                                   | Hendricson WD, et al.     | Development and initial validation of a dual-language English-Spanish format for the Arthritis Impact Measurement Scales                                                           | Arthritis Rheum              | 1989                                                                                                                                                                                | 32(9)                     | 153-159                                                                                                                                                                       |                           |                                                                                                                                                             |                           |                                                                                                                                                                                   |                              |          |       |          |
|                            |                                                                                                                                                                                   | Hill J, et al.            | The arthritis impact measurement scales: an anglicized version to assess the outcome of British patients with rheumatoid arthritis                                                 | Br J Rheumatol               | 1990                                                                                                                                                                                | 29(3)                     | 193-196                                                                                                                                                                       |                           |                                                                                                                                                             |                           |                                                                                                                                                                                   |                              |          |       |          |
|                            |                                                                                                                                                                                   | Kazis LE, et al.          | Effect Sizes for Interpreting Changes in Health Status                                                                                                                             | Med Care                     | 1989                                                                                                                                                                                | 27(3)                     | 178-5189                                                                                                                                                                      |                           |                                                                                                                                                             |                           |                                                                                                                                                                                   |                              |          |       |          |
|                            |                                                                                                                                                                                   | Lorish CD, et al.         | A Comparison of the Full and Short Versions of the Arthritis Impact Measurement Scales                                                                                             | Arthritis Care Res           | 1991                                                                                                                                                                                | 4(4)                      | 168-173                                                                                                                                                                       |                           |                                                                                                                                                             |                           |                                                                                                                                                                                   |                              |          |       |          |
|                            |                                                                                                                                                                                   | Potts MK & Brandt KD      | Evidence of the validity of the Arthritis Impact Measurement Scales                                                                                                                | Arthritis Rheum              | 1987                                                                                                                                                                                | 30(1)                     | 93-96                                                                                                                                                                         |                           |                                                                                                                                                             |                           |                                                                                                                                                                                   |                              |          |       |          |
|                            |                                                                                                                                                                                   | Senerdem N, et al.        | The Use of Two Different Health Assessment Questionnaires in Turkish Rheumatoid Arthritis Population and Assessment of the Associations with Disability                            | Clin Rheumatol               | 1999                                                                                                                                                                                | 18(1)                     | 33-37                                                                                                                                                                         |                           |                                                                                                                                                             |                           |                                                                                                                                                                                   |                              |          |       |          |
|                            |                                                                                                                                                                                   | Spitz PW & Fries JF       | The present and future of comprehensive outcome measures for rheumatic diseases                                                                                                    | Clin Rheumatol               | 1987                                                                                                                                                                                | 6.Suppl 2                 | 105-111                                                                                                                                                                       |                           |                                                                                                                                                             |                           |                                                                                                                                                                                   |                              |          |       |          |
|                            |                                                                                                                                                                                   | Taal E, et al.            | Evaluation of the Dutch Arthritis Impact Measurement Scales (DUTCH-AIMS) in patients with rheumatoid arthritis                                                                     | Br J Rheumatol               | 1989                                                                                                                                                                                | 28(6)                     | 487-491                                                                                                                                                                       |                           |                                                                                                                                                             |                           |                                                                                                                                                                                   |                              |          |       |          |
|                            |                                                                                                                                                                                   | 2                         | AIMS2                                                                                                                                                                              | Archenholtz B & Bjelle A     | Reliability, validity, and sensitivity of a Swedish version of the revised and expanded arthritis impact measurement scales (AIMS2)                                                 | J Rheumatol               | 1997                                                                                                                                                                          | 24(7)                     | 370-377                                                                                                                                                     |                           |                                                                                                                                                                                   |                              |          |       |          |
|                            |                                                                                                                                                                                   |                           |                                                                                                                                                                                    | Arkela-Kaulainen M, et al.   | Evaluation of the Arthritis Impact Measurement Scales (AIMS2) in Finnish patients with rheumatoid arthritis                                                                         | Scand J Rheumatol         | 2003                                                                                                                                                                          | 32(5)                     | 300-305                                                                                                                                                     |                           |                                                                                                                                                                                   |                              |          |       |          |
|                            |                                                                                                                                                                                   |                           |                                                                                                                                                                                    | Brandão L, et al.            | Health status in rheumatoid arthritis: Cross cultural evaluation of a Portuguese version of the arthritis impact measurement scales 2 (BRASIL- AIMS2)                               | J Rheumatol               | 1998                                                                                                                                                                          | 25(8)                     | 499-501                                                                                                                                                     |                           |                                                                                                                                                                                   |                              |          |       |          |
|                            |                                                                                                                                                                                   |                           |                                                                                                                                                                                    | Chu EM, et al.               | Translation and Validation of Arthritis Impact Measurement Scales 2 Into Chinese: CAIMS2                                                                                            | Arthritis Rheum           | 2004                                                                                                                                                                          | 51(1)                     | 20-27                                                                                                                                                       |                           |                                                                                                                                                                                   |                              |          |       |          |
|                            |                                                                                                                                                                                   |                           |                                                                                                                                                                                    | da Mota Falção D, et al.     | Translation and cultural adaptation of quality of life questionnaires: an evaluation of methodology                                                                                 | J Rheumatol               | 2003                                                                                                                                                                          | 30(2)                     | 379-385                                                                                                                                                     |                           |                                                                                                                                                                                   |                              |          |       |          |
| Engelbrecht M, et al.      | Measuring pain and efficacy of pain treatment in inflammatory arthritis: a systematic literature review                                                                           |                           |                                                                                                                                                                                    | J Rheumatol                  | 2012                                                                                                                                                                                | Suppl 90                  | 3-10                                                                                                                                                                          |                           |                                                                                                                                                             |                           |                                                                                                                                                                                   |                              |          |       |          |
| Evers AW, et al.           | A comparison of two recently developed health status instruments for patients with arthritis: Dutch-AIMS2 and IRGL                                                                |                           |                                                                                                                                                                                    | Br J Rheumatol               | 1998                                                                                                                                                                                | 37(2)                     | 157-164                                                                                                                                                                       |                           |                                                                                                                                                             |                           |                                                                                                                                                                                   |                              |          |       |          |
| Haavardinn EA, et al.      | A comparison of agreement and sensitivity to change between AIMS2 and a short form of AIMS2 (AIMS2-SF) in more than 1,000 rheumatoid arthritis patients                           |                           |                                                                                                                                                                                    | J Rheumatol                  | 2000                                                                                                                                                                                | 27(12)                    | 810-2816                                                                                                                                                                      |                           |                                                                                                                                                             |                           |                                                                                                                                                                                   |                              |          |       |          |
| Hagen KB, et al.           | The responsiveness of health status measures in patients with rheumatoid arthritis: Comparison of disease-specific and generic instruments                                        |                           |                                                                                                                                                                                    | J Rheumatol                  | 1999                                                                                                                                                                                | 26(7)                     | 474-1480                                                                                                                                                                      |                           |                                                                                                                                                             |                           |                                                                                                                                                                                   |                              |          |       |          |
| Kvien TK, et al.           | Performance of the Norwegian SF-36 Health Survey in Patients with Rheumatoid Arthritis. II. A Comparison of the SF-36 with Disease-Specific Measures                              |                           |                                                                                                                                                                                    | J Clin Epidemiol             | 1998                                                                                                                                                                                | 51(11)                    | 1077-1086                                                                                                                                                                     |                           |                                                                                                                                                             |                           |                                                                                                                                                                                   |                              |          |       |          |
| Mason JH, et al.           | Do Self-Reported Arthritis Symptom (IRADAR) and Health Status (AIMS2) Data Provide Duplicative or Complementary Information?                                                      |                           |                                                                                                                                                                                    | Arthritis Care Res           | 1992                                                                                                                                                                                | 5(3)                      | 163-170                                                                                                                                                                       |                           |                                                                                                                                                             |                           |                                                                                                                                                                                   |                              |          |       |          |
| Meenan RF, et al.          | AIMS2: The Content and Properties of a Revised and Expanded Arthritis Impact Measurement Scales Health Status Questionnaire                                                       |                           |                                                                                                                                                                                    | Arthritis Rheum              | 1992                                                                                                                                                                                | 35(1)                     | 1-10                                                                                                                                                                          |                           |                                                                                                                                                             |                           |                                                                                                                                                                                   |                              |          |       |          |
| Pouchot J, et al.          | Validation of the French version of the arthritis impact measurement scales 2 and comparison with the French version of the Nottingham health profile                             |                           |                                                                                                                                                                                    | Rev Rhum Engl Ed             | 1996                                                                                                                                                                                | 63(6)                     | 389-404                                                                                                                                                                       |                           |                                                                                                                                                             |                           |                                                                                                                                                                                   |                              |          |       |          |
| Riemsma RP, et al.         | Evaluation of a Dutch version of the AIMS2 for patients with rheumatoid arthritis                                                                                                 |                           |                                                                                                                                                                                    | Br J Rheumatol               | 1996                                                                                                                                                                                | 35                        | 755-760                                                                                                                                                                       |                           |                                                                                                                                                             |                           |                                                                                                                                                                                   |                              |          |       |          |
| Salaffi F, et al.          | Responsiveness of Health Status Measures and Utility-based Methods in Patients with Rheumatoid Arthritis                                                                          |                           |                                                                                                                                                                                    | Clin Rheumatol               | 2002                                                                                                                                                                                | 21(6)                     | 478-487                                                                                                                                                                       |                           |                                                                                                                                                             |                           |                                                                                                                                                                                   |                              |          |       |          |
| Sato H, et al.             | Validity and reliability of a revised Japanese version of the Arthritis Impact Measurement Scales version 2 (AIMS2)                                                               |                           |                                                                                                                                                                                    | Mod Rheumatol                | 2000                                                                                                                                                                                | 10(4)                     | 247-255                                                                                                                                                                       |                           |                                                                                                                                                             |                           |                                                                                                                                                                                   |                              |          |       |          |
| Sotoova & Macejova         | Is the Arthritis Impact Measurement Scales 2 a good tool to assess quality of life in Slovak patients with rheumatoid arthritis?                                                  |                           |                                                                                                                                                                                    | Bratisl Lek Listy            | 2013                                                                                                                                                                                | 114(9)                    | 534-539                                                                                                                                                                       |                           |                                                                                                                                                             |                           |                                                                                                                                                                                   |                              |          |       |          |
| Taal E, et al.             | Sensitivity to change of AIMS2 and AIMS2-SF components in comparison to M-HAQ and VAS-pain                                                                                        |                           |                                                                                                                                                                                    | Ann Rheum Dis                | 2004                                                                                                                                                                                | 63(12)                    | 1655-1658                                                                                                                                                                     |                           |                                                                                                                                                             |                           |                                                                                                                                                                                   |                              |          |       |          |
| 3                          | AUSCAN                                                                                                                                                                            |                           |                                                                                                                                                                                    | van der Giesen FJ, et al.    | Responsiveness of the Michigan Hand Outcomes Questionnaire—Dutch Language Version in Patients With Rheumatoid Arthritis                                                             | Arch Phys Med Rehabil     | 2008                                                                                                                                                                          | 89(6)                     | 121-1126                                                                                                                                                    |                           |                                                                                                                                                                                   |                              |          |       |          |
|                            |                                                                                                                                                                                   |                           |                                                                                                                                                                                    | Veehof MM, et al.            | Comparison of Internal and External Responsiveness of the Generic Medical Outcome Study Short Form-36 (SF-36) with Disease-specific Measures in Rheumatoid Arthritis                | J Rheumatol               | 2008                                                                                                                                                                          | 35(4)                     | 610-617                                                                                                                                                     |                           |                                                                                                                                                                                   |                              |          |       |          |
|                            |                                                                                                                                                                                   | Waljee JF, et al.         | Validity and Responsiveness of the Michigan Hand Questionnaire in Patients With Rheumatoid Arthritis: A Multicenter, International Study                                           | Arthritis Care Res           | 2010                                                                                                                                                                                | 62(11)                    | 1659-1577                                                                                                                                                                     |                           |                                                                                                                                                             |                           |                                                                                                                                                                                   |                              |          |       |          |
|                            |                                                                                                                                                                                   | 4                         | FFI                                                                                                                                                                                | Massy-Westropp N, et al.     | Comparing the AUSCAN Osteoarthritis Hand Index, Michigan Hand Outcomes Questionnaire, and Sequential Occupational Dexterity Assessment for patients with rheumatoid arthritis       | J Rheumatol               | 2004                                                                                                                                                                          | 31(10)                    | 996-2001                                                                                                                                                    |                           |                                                                                                                                                                                   |                              |          |       |          |
|                            |                                                                                                                                                                                   |                           |                                                                                                                                                                                    | Budiman-Mak E, et al.        | The Foot Function Index: a measure of foot pain and disability                                                                                                                      | J Clin Epidemiol          | 1991                                                                                                                                                                          | 44(6)                     | 561-570                                                                                                                                                     |                           |                                                                                                                                                                                   |                              |          |       |          |
|                            |                                                                                                                                                                                   |                           |                                                                                                                                                                                    | Muradin I & van der Heide HJ | The foot function index is more sensitive to change than the Leeds Foot Impact Scale for evaluating rheumatoid arthritis patients after forefoot or hindfoot reconstruction         | Int Orthop                | 2016                                                                                                                                                                          | 40(4)                     | 745-749                                                                                                                                                     |                           |                                                                                                                                                                                   |                              |          |       |          |
|                            |                                                                                                                                                                                   |                           |                                                                                                                                                                                    | Pourtier-Piotte C, et al.    | French validation of the Foot Function Index (FFI)                                                                                                                                  | Ann Phys Rehabil Med      | 2005                                                                                                                                                                          | 58                        | 276-282                                                                                                                                                     |                           |                                                                                                                                                                                   |                              |          |       |          |
|                            |                                                                                                                                                                                   |                           |                                                                                                                                                                                    | 5                            | FHSQ                                                                                                                                                                                | Ferreira AF, et al.       | Brazilian version of the foot health status questionnaire (FHSQ-BR): cross-cultural adaptation and evaluation of measurement properties                                       | Clinics                   | 2008                                                                                                                                                        | 63(5)                     | 595-600                                                                                                                                                                           |                              |          |       |          |
|                            |                                                                                                                                                                                   |                           |                                                                                                                                                                                    |                              |                                                                                                                                                                                     | Chung KC, et al.          | Reliability and Validity Testing of the Michigan Hand Outcomes Questionnaire                                                                                                  | J Hand Surg Am            | 1998                                                                                                                                                        | 23(4)                     | 575-587                                                                                                                                                                           |                              |          |       |          |
|                            |                                                                                                                                                                                   |                           |                                                                                                                                                                                    |                              |                                                                                                                                                                                     | Dritsaki M, et al.        | An empirical evaluation of the SF-12, SF-6D, EQ-5D and Michigan Hand Outcome Questionnaire in patients with rheumatoid arthritis of the hand                                  | Health Qual Life Outcomes | 2017                                                                                                                                                        | 15(1)                     | 20                                                                                                                                                                                |                              |          |       |          |
|                            |                                                                                                                                                                                   |                           |                                                                                                                                                                                    |                              |                                                                                                                                                                                     | Massy-Westropp N, et al.  | Comparing the AUSCAN Osteoarthritis Hand Index, Michigan Hand Outcomes Questionnaire, and Sequential Occupational Dexterity Assessment for patients with rheumatoid arthritis | J Rheumatol               | 2004                                                                                                                                                        | 31(10)                    | 996-2001                                                                                                                                                                          |                              |          |       |          |
|                            |                                                                                                                                                                                   |                           |                                                                                                                                                                                    |                              |                                                                                                                                                                                     | Meireles SM, et al.       | Cross-cultural adaptation and validation of the Michigan Hand Outcomes Questionnaire (MHQ) for Brazil: validation study                                                       | Sao Paulo Med J           | 2014                                                                                                                                                        | 132(6)                    | 339-347                                                                                                                                                                           |                              |          |       |          |
|                            |                                                                                                                                                                                   |                           |                                                                                                                                                                                    |                              |                                                                                                                                                                                     | Sears ED, et al.          | Validity and Responsiveness of the Jebsen-Taylor Hand Function Test                                                                                                           | J Hand Surg Am            | 2010                                                                                                                                                        | 35(1)                     | 30-37                                                                                                                                                                             |                              |          |       |          |
|                            |                                                                                                                                                                                   |                           |                                                                                                                                                                                    |                              |                                                                                                                                                                                     | Shauver MJ & Chung KC     | The Minimal Clinically Important Difference of the Michigan Hand Outcomes Questionnaire                                                                                       | J Hand Surg Am            | 2009                                                                                                                                                        | 34(3)                     | 509-514                                                                                                                                                                           |                              |          |       |          |
|                            |                                                                                                                                                                                   |                           |                                                                                                                                                                                    |                              |                                                                                                                                                                                     | van der Giesen FJ, et al. | Responsiveness of the Michigan Hand Outcomes Questionnaire—Dutch Language Version in Patients With Rheumatoid Arthritis                                                       | Arch Phys Med Rehabil     | 2008                                                                                                                                                        | 89(6)                     | 121-1126                                                                                                                                                                          |                              |          |       |          |
|                            |                                                                                                                                                                                   |                           |                                                                                                                                                                                    |                              |                                                                                                                                                                                     | Waljee JF, et al.         | Validity and Responsiveness of the Michigan Hand Questionnaire in Patients With Rheumatoid Arthritis: A Multicenter, International Study                                      | Arthritis Care Res        | 2010                                                                                                                                                        | 62(11)                    | 1659-1577                                                                                                                                                                         |                              |          |       |          |
|                            |                                                                                                                                                                                   |                           |                                                                                                                                                                                    |                              |                                                                                                                                                                                     | Yasui T, et al.           | Relationship between roentgenographic joint destruction in the hands and functional disorders among patients with rheumatoid arthritis                                        | Mod Rheumatol             | 2017                                                                                                                                                        | 27(5)                     | 828-832                                                                                                                                                                           |                              |          |       |          |
|                            |                                                                                                                                                                                   |                           |                                                                                                                                                                                    |                              |                                                                                                                                                                                     | 7                         | MOS-PI                                                                                                                                                                        | Horta-Baas G, et al.      | Evaluation of pain intensity in people with rheumatoid arthritis using the MOS intensity scale                                                              | Med Clin (Barc)           | 2019                                                                                                                                                                              | 153(3)                       | 106-111  |       |          |
|                            |                                                                                                                                                                                   |                           |                                                                                                                                                                                    |                              |                                                                                                                                                                                     |                           |                                                                                                                                                                               | 8                         | NHP                                                                                                                                                         | Akar S, et al.            | Quality of life in patients with Takayasu's arteritis is impaired and comparable with rheumatoid arthritis and ankylosing spondylitis patients                                    | Clin Rheumatol               | 2008     | 27(7) | 859-865  |
|                            |                                                                                                                                                                                   |                           |                                                                                                                                                                                    |                              |                                                                                                                                                                                     |                           |                                                                                                                                                                               |                           |                                                                                                                                                             | Borman P, et al.          | A comparative evaluation of quality of life and life satisfaction in patients with psoriatic and rheumatoid arthritis                                                             | Clin Rheumatol               | 2007     | 26(3) | 330-334  |
| Eberhardt K, et al.        | Measuring health related quality of life in patients with rheumatoid arthritis - reliability, validity, and responsiveness of a Swedish version of RAQoL                          |                           |                                                                                                                                                                                    |                              |                                                                                                                                                                                     |                           |                                                                                                                                                                               |                           |                                                                                                                                                             | Scand J Rheumatol         | 2002                                                                                                                                                                              | 31(1)                        | 6-12     |       |          |
| Fitzpatrick R, et al.      | A generic health status instrument in the assessment of rheumatoid arthritis                                                                                                      |                           |                                                                                                                                                                                    |                              |                                                                                                                                                                                     |                           |                                                                                                                                                                               |                           |                                                                                                                                                             | Br J Rheumatol            | 1992                                                                                                                                                                              | 31(2)                        | 87-90    |       |          |
| Fitzpatrick R, et al.      | Importance of sensitivity to change as a criterion for selecting health status measures                                                                                           |                           |                                                                                                                                                                                    |                              |                                                                                                                                                                                     |                           |                                                                                                                                                                               |                           |                                                                                                                                                             | Qual Health Care          | 1992                                                                                                                                                                              | 1(2)                         | 89-93    |       |          |
| Houssien DA, et al.        | The Nottingham health profile as a measure of disease activity and outcome in rheumatoid arthritis                                                                                | Br J Rheumatol            | 1997                                                                                                                                                                               |                              |                                                                                                                                                                                     |                           |                                                                                                                                                                               |                           |                                                                                                                                                             | 36(1)                     | 69-73                                                                                                                                                                             |                              |          |       |          |
| Jenkinson S, et al.        | The Nottingham health profile: An analysis of its sensitivity in differentiating illness groups                                                                                   | Soc Sci Med               | 1988                                                                                                                                                                               |                              |                                                                                                                                                                                     |                           |                                                                                                                                                                               |                           |                                                                                                                                                             | 27(12)                    | 411-414                                                                                                                                                                           |                              |          |       |          |
| Lovas K, et al.            | Establishing a standard for patient-completed instrument adaptations in Eastern Europe: experience with the Nottingham Health Profile in Hungary                                  | Health Policy             | 2003                                                                                                                                                                               |                              |                                                                                                                                                                                     |                           |                                                                                                                                                                               |                           |                                                                                                                                                             | 63(1)                     | 49-61                                                                                                                                                                             |                              |          |       |          |
| Pouchot J, et al.          | Validation of the French version of the arthritis impact measurement scales 2 and comparison with the French version of the Nottingham health profile                             | Rev Rhum Engl Ed          | 1996                                                                                                                                                                               |                              |                                                                                                                                                                                     |                           |                                                                                                                                                                               |                           |                                                                                                                                                             | 63(6)                     | 389-404                                                                                                                                                                           |                              |          |       |          |
| Ribas SA, et al.           | Sensitivity and specificity of assessment instruments of quality of life in rheumatoid arthritis                                                                                  | Rev Bras Reumatol Engl Ed | 2016                                                                                                                                                                               | 56(5)                        | 406-413                                                                                                                                                                             |                           |                                                                                                                                                                               |                           |                                                                                                                                                             |                           |                                                                                                                                                                                   |                              |          |       |          |
| Sivas F, et al.            | The Nottingham health profile in rheumatoid arthritis: correlation with other health status measurements and clinical variables                                                   | Rheumatol Int             | 2004                                                                                                                                                                               | 24(4)                        | 203-206                                                                                                                                                                             |                           |                                                                                                                                                                               |                           |                                                                                                                                                             |                           |                                                                                                                                                                                   |                              |          |       |          |
| Uutela T, et al.           | Validity of the Nottingham Health Profile in a Finnish out-patient population with rheumatoid arthritis                                                                           | Rheumatology              | 2003                                                                                                                                                                               | 42(7)                        | 841-845                                                                                                                                                                             |                           |                                                                                                                                                                               |                           |                                                                                                                                                             |                           |                                                                                                                                                                                   |                              |          |       |          |
| Wilburn J, et al.          | Further international adaptation and validation of the Rheumatoid Arthritis Quality of Life (RAQoL) questionnaire                                                                 | Rheumatol Int             | 2015                                                                                                                                                                               | 35(4)                        | 669-675                                                                                                                                                                             |                           |                                                                                                                                                                               |                           |                                                                                                                                                             |                           |                                                                                                                                                                                   |                              |          |       |          |
| Zlatkovic-Svenda M, et al. | Adaptation and validation of the Rheumatoid Arthritis Quality of Life (RAQoL) questionnaire for use in Serbia                                                                     | Rheumatol Int             | 2017                                                                                                                                                                               | 37(4)                        | 641-646                                                                                                                                                                             |                           |                                                                                                                                                                               |                           |                                                                                                                                                             |                           |                                                                                                                                                                                   |                              |          |       |          |
| Dawson J, et al.           | Specificity and responsiveness of patient-reported and clinician-rated outcome measures in the context of elbow surgery, comparing patients with and without rheumatoid arthritis | Orthop Traumatol Surg Res | 2012                                                                                                                                                                               | 98(6)                        | 652-658                                                                                                                                                                             |                           |                                                                                                                                                                               |                           |                                                                                                                                                             |                           |                                                                                                                                                                                   |                              |          |       |          |
| 9                          | OES                                                                                                                                                                               | Ribjerg-Madsen S, et al.  | Psychometric properties of the painDETECT questionnaire in rheumatoid arthritis, psoriatic arthritis and spondyloarthritis: Rasch analysis and test-retest reliability             | Health Qual Life Outcomes    | 2017                                                                                                                                                                                |                           |                                                                                                                                                                               |                           |                                                                                                                                                             | 15(1)                     | 110                                                                                                                                                                               |                              |          |       |          |
|                            |                                                                                                                                                                                   | 10                        | PDQ (PainDetect)                                                                                                                                                                   | Katz P, et al.               | Performance of the Patient-Reported Outcomes Measurement Information System 29-Item Profile in Rheumatoid Arthritis, Osteoarthritis, Fibromyalgia, and Systemic Lupus Erythematosus |                           |                                                                                                                                                                               |                           |                                                                                                                                                             | Arthritis Care Res        | 2017                                                                                                                                                                              | 69(9)                        | 312-1321 |       |          |
|                            |                                                                                                                                                                                   |                           |                                                                                                                                                                                    | 11                           | PROMIS-PI 3a-SF                                                                                                                                                                     |                           |                                                                                                                                                                               |                           |                                                                                                                                                             | Bartlett SJ, et al.       | Reliability and Validity of Selected PROMIS Measures in People with Rheumatoid Arthritis                                                                                          | PLoS One                     | 2015     | 10(9) | 10138543 |
|                            |                                                                                                                                                                                   |                           |                                                                                                                                                                                    |                              |                                                                                                                                                                                     |                           |                                                                                                                                                                               |                           |                                                                                                                                                             | Wohlfahrt A, et al.       | Responsiveness of Patient-Reported Outcomes Measurement Information System Measures in Rheumatoid Arthritis Patients Starting or Switching a Disease-Modifying Antirheumatic Drug | Arthritis Care Res (Hoboken) | 2019     | 71(4) | 521-529  |
|                            |                                                                                                                                                                                   |                           |                                                                                                                                                                                    |                              |                                                                                                                                                                                     | Laas K, et al.            | Early improvement of health-related quality of life during treatment with etanercept and adalimumab in patients with rheumatoid arthritis in routine practice.                |                           |                                                                                                                                                             | Clin Exp Rheumatol        | 2009                                                                                                                                                                              | 27(2)                        | 315-20   |       |          |
|                            |                                                                                                                                                                                   |                           |                                                                                                                                                                                    |                              |                                                                                                                                                                                     | 12                        | RAND-36                                                                                                                                                                       | Brenner AB, et al.        | Validation of the Rheumatoid and Arthritis Outcome Score (RAOS) for the lower extremity                                                                     | Health Qual Life Outcomes | 2003                                                                                                                                                                              | 1                            | 55       |       |          |
|                            |                                                                                                                                                                                   |                           |                                                                                                                                                                                    |                              |                                                                                                                                                                                     |                           |                                                                                                                                                                               | Duval A, et al.           | Cross-cultural adaptation and validation of the French version of the Rheumatoid and Arthritis Outcome Score (RAOS)                                         | Clin Exp Rheumatol        | 2010                                                                                                                                                                              | 28(6)                        | 806-812  |       |          |
|                            |                                                                                                                                                                                   |                           |                                                                                                                                                                                    |                              |                                                                                                                                                                                     |                           |                                                                                                                                                                               | Karatepe AG, et al.       | The validity and reliability of the Turkish version of the Rheumatoid and Arthritis Outcome Score (RAOS) in patients with rheumatoid arthritis              | Clin Rheumatol            | 2009                                                                                                                                                                              | 28(1)                        | 47-51    |       |          |
|                            |                                                                                                                                                                                   |                           |                                                                                                                                                                                    |                              |                                                                                                                                                                                     |                           |                                                                                                                                                                               | Negahban H, et al.        | Reliability, validity, and responsiveness of the Persian version of the rheumatoid and arthritis outcome score (RAOS) in patients with rheumatoid arthritis | Clin Rheumatol            | 2015                                                                                                                                                                              | 34(1)                        | 35-42    |       |          |
|                            |                                                                                                                                                                                   |                           |                                                                                                                                                                                    |                              |                                                                                                                                                                                     |                           |                                                                                                                                                                               | Anderson DL               | Development of an Instrument to Measure Pain in Rheumatoid Arthritis: Rheumatoid Arthritis Pain Scale (RAPS)                                                | Arthritis Care Res        | 2001                                                                                                                                                                              | 45(4)                        | 317-323  |       |          |
|                            |                                                                                                                                                                                   |                           |                                                                                                                                                                                    |                              |                                                                                                                                                                                     |                           |                                                                                                                                                                               | 13                        | RAOS                                                                                                                                                        | Kianifard T, et al.       | Validation and relevance of Rheumatoid Arthritis Pain Scale (RAPS) in Indian (Asian) patients suffering from rheumatoid arthritis                                                 | Clin Rheumatol               | 2016     | 35(1) | 63-71    |
|                            |                                                                                                                                                                                   |                           |                                                                                                                                                                                    |                              |                                                                                                                                                                                     |                           |                                                                                                                                                                               |                           |                                                                                                                                                             | Singh H, et al.           | The Validity and Sensitivity of Rheumatoid Arthritis Pain Scale on a Different Ethnic Group From Indian Rheumatoid Arthritis Patients                                             | Arch Rheumatol               | 2020     | 35(1) | 90-96    |

|                      |                           |                                                                                                                                                                                                                                                               |                           |      |              |           |
|----------------------|---------------------------|---------------------------------------------------------------------------------------------------------------------------------------------------------------------------------------------------------------------------------------------------------------|---------------------------|------|--------------|-----------|
| 16 SACRAH            | Tofani M, et al.          | The Italian version of rheumatoid arthritis pain scale (IT-RAPS): Psychometric properties on community and clinical samples                                                                                                                                   | Reumatismo                | 2019 | 71(1)        | 13-18     |
|                      | Leeb BF, et al.           | SACRAH: a score for assessment and quantification of chronic rheumatic affections of the hands                                                                                                                                                                | Rheumatology              | 2003 | 42(10)       | 173-1178  |
| 17 SAFE-Q            | Yano K, et al.            | Validity and responsiveness of a self-administered foot evaluation questionnaire in rheumatoid arthritis                                                                                                                                                      | Mod Rheumatol             | 2015 | 25(3)        | 358-361   |
|                      | Cella D, et al.           | Validation of the Functional Assessment of Chronic Illness Therapy Fatigue Scale Relative to Other Instrumentation in Patients with Rheumatoid Arthritis                                                                                                      | J Rheumatol               | 2005 | 32(5)        | 811-819   |
| 18 SF-36             | Chogle AR, et al.         | Comparison of the Indian version of Health Assessment Questionnaire Score and Short Form 36 Physical Function Score in rheumatoid arthritis using Rasch analysis                                                                                              | Indian J Rheumatol        | 2008 | 3(2)         | 52-57     |
|                      | Dures EK, et al.          | Reliability and sensitivity to change of the Bristol Rheumatoid Arthritis Fatigue scales                                                                                                                                                                      | Rheumatology              | 2013 | 52(10)       | 832-1839  |
| 19 SF-MPQ            | Durmus B, et al.          | Can the patient-reported outcome instruments determine disease activity in rheumatoid arthritis?                                                                                                                                                              | Bratisl Lek Listy         | 2011 | 112(10)      | 555-561   |
|                      | Englbrecht M, et al.      | Measuring pain and efficacy of pain treatment in inflammatory arthritis: a systematic literature review                                                                                                                                                       | J Rheumatol               | 2012 | 90           | 3-10      |
| 20 WOMAC             | Feroz AH, et al.          | The Bengal Short Form-36 was acceptable, reliable, and valid in patients with rheumatoid arthritis                                                                                                                                                            | J Clin Epidemiol          | 2012 | 65(11)       | 1227-1235 |
|                      | Gao L, et al.             | Psychometric properties of the Chinese version of Arthritis Self-Efficacy Scale-8 (ASES-8) in a rheumatoid arthritis population                                                                                                                               | Rheumatol Int             | 2017 | 37(5)        | 751-756   |
| 21 BRAF-MDQ          | Hammond A, et al.         | The reliability and validity of the English version of the Evaluation of Daily Activity Questionnaire for people with rheumatoid arthritis                                                                                                                    | Rheumatology              | 2015 | 54(9)        | 1605-1615 |
|                      | Hays RD, et al.           | Responsiveness and minimally important difference for the Patient-Reported Outcomes Measurement Information System (PROMIS) 20-item physical functioning short form in a prospective observational study of rheumatoid arthritis                              | Ann Rheum Dis             | 2015 | 74(1)        | 104-107   |
| 22 CFS               | Hurst NP, et al.          | Comparison of the MOS short form-12 (SF12) health status questionnaire with the SF36 in patients with rheumatoid arthritis                                                                                                                                    | Br J Rheumatol            | 1998 | 37(8)        | 862-869   |
|                      | Koh ET, et al.            | The reliability, validity and sensitivity to change of the Chinese version of SF-36 in oriental patients with rheumatoid arthritis                                                                                                                            | Rheumatology              | 2006 | 45(8)        | 1023-1028 |
| 23 CISBR             | Kvien TK, et al.          | Performance of the Norwegian SF-36 Health Survey in Patients with Rheumatoid Arthritis. II. A Comparison of the SF-36 with Disease-Specific Measures                                                                                                          | J Clin Epidemiol          | 1998 | 51(11)       | 1077-1086 |
|                      | Lima Eda S, et al.        | Translation, cultural adaptation and reproducibility of the Oxford Shoulder Score questionnaire for Brazil, among patients with rheumatoid arthritis                                                                                                          | Sao Paulo Med J           | 2016 | 134(1)       | 40-46     |
| 24 FACIT-F           | Linde L, et al.           | Health-Related Quality of Life: Validity, Reliability, and Responsiveness of SF-36, EQ-15D, EQ-5D, RAQoL, and HAQ in Patients with Rheumatoid Arthritis                                                                                                       | J Rheumatol               | 2008 | 35(8)        | 528-537   |
|                      | Martin M, et al.          | Item response theory methods can improve the measurement of physical function by combining the modified health assessment questionnaire and the SF-36 physical function scale                                                                                 | Qual Life Res             | 2007 | 16(4)        | 647-660   |
| 25 FSS               | Nazary-Moghadam S, et al. | Adaptation, reliability and validity testing of a Persian version of the Health Assessment Questionnaire-Disability Index in Iranian patients with rheumatoid arthritis                                                                                       | J Bodyw Mov Ther          | 2017 | 21(1)        | 133-140   |
|                      | Negahban H, et al.        | Reliability, validity, and responsiveness of the Persian version of the rheumatoid and arthritis outcome score (RAOS) in patients with rheumatoid arthritis                                                                                                   | Clin Rheumatol            | 2015 | 34(1)        | 35-42     |
| 26 MAF               | Nicklin J, et al.         | Measuring Fatigue in Rheumatoid Arthritis: A Cross-Sectional Study to Evaluate the Bristol Rheumatoid Arthritis Fatigue Multi-Dimensional Questionnaire, Visual Analog Scales, and Numerical Rating Scales                                                    | Arthritis Care Res        | 2010 | 62(11)       | 1559-1568 |
|                      | Oude Voshaar MA, et al.   | Assessment of Fatigue in Rheumatoid Arthritis: A Psychometric Comparison of Single-Item, Multitem, and Multidimensional Measures                                                                                                                              | J Rheumatol               | 2015 | 42(3)        | 413-20    |
| 27 MFI               | Oude Voshaar MA, et al.   | Measuring Disease Exacerbation and Flares in Rheumatoid Arthritis: Comparison of Commonly Used Disease Activity Indices and Individual Measures.                                                                                                              | J Rheumatol               | 2017 | 44(8)        | 1118-1124 |
|                      | Oude Voshaar MA, et al.   | Validity and measurement precision of the PROMIS physical function item bank and a content validity driven 20-item short form in rheumatoid arthritis compared with traditional measures                                                                      | Rheumatology              | 2015 | 54(12)       | 221-2229  |
| 28 POMS-Fatigue      | Pakpour AH, et al.        | Health-related quality of life in young adult patients with rheumatoid arthritis in Iran: reliability and validity of the Persian translation of the PedSQL™ 4.0 Generic Core Scales Young Adult Version                                                      | Clin Rheumatol            | 2013 | 32(1)        | 15-22     |
|                      | Pouchot J, et al.         | Determination of the minimal clinically important difference for seven fatigue measures in rheumatoid arthritis                                                                                                                                               | J Clin Epidemiol          | 2008 | 61(7)        | 705-713   |
| 29 PROMIS Fatigue 4a | Russell AS, et al.        | The responsiveness of generic health status measures as assessed in patients with rheumatoid arthritis receiving infliximab                                                                                                                                   | J Rheumatol               | 2003 | 30(5)        | 941-947   |
|                      | Ruta D, et al.            | Measuring health status in British patients with rheumatoid arthritis: reliability, validity and responsiveness of the short form 36-item health survey (SF-36)                                                                                               | Br J Rheumatol            | 1998 | 37(4)        | 425-436   |
| 30 FACIT-F           | Strand U, et al.          | Health-related Quality of Life Outcomes of Adalimumab for Patients with Early Rheumatoid Arthritis: Results from a Randomized Multicenter Study                                                                                                               | J Rheumatol               | 2012 | 39(1)        | 63-72     |
|                      | Taylor WJ & McPherson KM  | Using Rasch Analysis to Compare the Psychometric Properties of the Short Form 36 Physical Function Score and the Health Assessment Questionnaire Disability Index in Patients With Psoriatic Arthritis and Rheumatoid Arthritis                               | Arthritis Rheum           | 2007 | 57(5)        | 723-729   |
| 31 SF-MPQ            | ten Klooster PM, et al.   | Development and evaluation of a crosswalk between the SF-36 physical functioning scale and Health Assessment Questionnaire disability index in rheumatoid arthritis                                                                                           | Health Qual Life Outcomes | 2013 | 11           | 199       |
|                      | ten Klooster PM, et al.   | Performance of the Dutch SF-36 version 2 as a measure of health-related quality of life in patients with rheumatoid arthritis                                                                                                                                 | Health Qual Life Outcomes | 2013 | 11           | 77        |
| 32 SF-MPQ            | Tugwell P, et al.         | Clinical improvement as reflected in measures of function and health-related quality of life following treatment with leflunomide compared with methotrexate in patients with rheumatoid arthritis: sensitivity and relative efficiency to detect a treatment | Arthritis Rheum           | 2000 | 43(3)        | 505-514   |
|                      | Veehof MM, et al.         | Comparison of Internal and External Responsiveness of the Generic Medical Outcome Study Short Form-36 (SF-36) with Disease-Specific Measures in Rheumatoid Arthritis                                                                                          | J Rheumatol               | 2008 | 35(4)        | 610-617   |
| 33 SF-MPQ            | Ward MM, et al.           | Clinically important changes in short form-36 scales for use in rheumatoid arthritis clinical trials: the impact of low responsiveness                                                                                                                        | Arthritis Care Res        | 2014 | 66(12)       | 1783-1789 |
|                      | Weinblatt ME, et al.      | Effects of Fostamatinib (R788), an Oral Spleen Tyrosine Kinase Inhibitor, on Health-Related Quality of Life in Patients with Active Rheumatoid Arthritis: Analyses of Patient-Reported Outcomes from a Randomized, Double-blind, Placebo-controlled Trial     | J Rheumatol               | 2013 | 40(4)        | 369-378   |
| 34 FACIT-F           | Wells G, et al.           | Responsiveness of patient reported outcomes including fatigue, sleep quality, activity limitation, and quality of life following treatment with abatacept for rheumatoid arthritis                                                                            | Ann Rheum Dis             | 2008 | 67(2)        | 260-265   |
|                      | Wolfe F                   | Fatigue Assessments in Rheumatoid Arthritis: Comparative Performance of Visual Analog Scales and Longer Fatigue Questionnaires in 7760 Patients                                                                                                               | J Rheumatol               | 2004 | 31(10)       | 896-1902  |
| 35 SF-MPQ            | Burckhard CS, et al.      | A Swedish Version of the Short-Form McGill Pain Questionnaire                                                                                                                                                                                                 | Scand J Rheumatol         | 1994 | 23(2)        | 77-81     |
|                      | Hawker GA, et al.         | Measures of adult pain: Visual Analog Scale for Pain (VAS Pain), Numeric Rating Scale for Pain (NRS Pain), McGill Pain Questionnaire (MPQ), Short-Form McGill Pain Questionnaire (SF-MPQ), Chronic Pain Grade Scale (CPGS), Short Form-36 Bodily Pain Scale   | Arthritis Care Res        | 2011 | 63(suppl 11) | 240-5252  |
| 36 WOMAC             | Yakut Y, et al.           | Reliability and validity of the Turkish version short-form McGill pain questionnaire in patients with rheumatoid arthritis                                                                                                                                    | Clin Rheumatol            | 2007 | 26(7)        | 1083-1087 |
|                      | Wolfe F & Kong SX         | Determinants of WOMAC function, pain and stiffness scores: evidence for the role of low back pain, symptom counts, fatigue and depression in osteoarthritis, rheumatoid arthritis and fibromyalgia.                                                           | Rheumatology              | 1999 | 38(4)        | 355-361   |
| 37 BRAF-MDQ          | Dures EK, et al.          | Rasch analysis of the Western Ontario MacMaster questionnaire (WOMAC) in 2205 patients with osteoarthritis, rheumatoid arthritis, and fibromyalgia.                                                                                                           | Ann Rheum Dis             | 1999 | 58(9)        | 563-568   |
|                      | Feldthuesen C, et al.     | Reliability and sensitivity to change of the Bristol Rheumatoid Arthritis Fatigue scales                                                                                                                                                                      | Rheumatology              | 2013 | 52(10)       | 832-1839  |
| 38 SF-MPQ            | Gao L, et al.             | EXPLANATORY FACTORS AND PREDICTORS OF FATIGUE IN PERSONS WITH RHEUMATOID ARTHRITIS: A LONGITUDINAL STUDY                                                                                                                                                      | J Rehabil Med             | 2016 | 48(5)        | 469-476   |
|                      | Hewlett S, et al.         | Validity and Reliability of the Chinese Version of FACIT-F and BRAF-MDQ in Rheumatoid Arthritis Patients                                                                                                                                                      | Chinese General Practice  | 2019 | 22(17)       | 1111-2115 |
| 39 SF-MPQ            | Kirwan J, et al.          | The revised Bristol Rheumatoid Arthritis Fatigue measures and the Rheumatoid Arthritis Impact of Disease scale: validation in six countries                                                                                                                   | Rheumatology              | 2018 | 57(2)        | 300-308   |
|                      | Nicklin J, et al.         | Validity and Responsiveness of the Bristol Rheumatoid Arthritis Fatigue Multidimensional Questionnaire (BRAF-MDQ) in a Randomized Clinical Trial                                                                                                              | Value Health              | 2014 | 17(7)        | 1568-569  |
| 40 SF-MPQ            | Nicklaus S, et al.        | Measuring Fatigue in Rheumatoid Arthritis: A Cross-Sectional Study to Evaluate the Bristol Rheumatoid Arthritis Fatigue Multi-Dimensional Questionnaire, Visual Analog Scales, and Numerical Rating Scales                                                    | Arthritis Care Res        | 2010 | 62(11)       | 1559-1568 |
|                      | Oude Voshaar MA, et al.   | Construct Validation of a Multidimensional Computerized Adaptive Test for Fatigue in Rheumatoid Arthritis                                                                                                                                                     | PLoS One                  | 2015 | 10(12)       | 0145008   |
| 41 SF-MPQ            | Oude Voshaar MAH, et al.  | Assessment of Fatigue in Rheumatoid Arthritis: A Psychometric Comparison of Single-Item, Multitem, and Multidimensional Measures                                                                                                                              | J Rheumatol               | 2015 | 42(3)        | 413-20    |
|                      | Sari F, et al.            | Psychometric properties and cross-language equivalence of the revised Bristol Rheumatoid Arthritis Fatigue and the Rheumatoid Arthritis Impact of Disease scales in rheumatoid arthritis                                                                      | Quality of Life Research  | 2019 | 28(9)        | 543-2552  |
| 42 CFS               | Lwin CTT, et al.          | Reliability, validity, and cross-cultural adaptation of the Turkish version of the Bristol Rheumatoid Arthritis Fatigue Multi-Dimensional Questionnaire                                                                                                       | Clinical Rheumatology     | 2018 | 37(6)        | 1465-1470 |
|                      | Pouchot J, et al.         | The assessment of fatigue in primary Sjogren's syndrome                                                                                                                                                                                                       | Scand J Rheumatol         | 2003 | 32(1)        | 33-37     |
| 43 CISBR             | Evers AW, et al.          | Determination of the minimal clinically important difference for seven fatigue measures in rheumatoid arthritis                                                                                                                                               | J Clin Epidemiol          | 2008 | 61(7)        | 705-713   |
|                      | Hoving JL, et al.         | Tailored cognitivebehavioral therapy in early rheumatoid arthritis for patients at risk: an RCT                                                                                                                                                               | Pain                      | 2002 | 100(1-2)     | 141-153   |
| 44 FACIT-F           | Van Hoogmoed D, et al.    | Perceived work ability, quality of life and fatigue in patients with rheumatoid arthritis after a 6 month course of TNF inhibitors: prospective intervention study and partial economic evaluation.                                                           | Scand J Rheumatol         | 2009 | 38(4)        | 246-250   |
|                      | Cella D, et al.           | How to assess fatigue in rheumatoid arthritis: validity and reliability of the Checklist Individual Strength [abstract]                                                                                                                                       | Arthritis Rheum           | 2008 | 58(suppl)    | S868      |
| 45 SF-MPQ            | Dures EK, et al.          | Validation of the Functional Assessment of Chronic Illness Therapy Fatigue Scale Relative to Other Instrumentation in Patients with Rheumatoid Arthritis                                                                                                      | J Rheumatol               | 2006 | 32(5)        | 811-819   |
|                      | Gao L, et al.             | Reliability and sensitivity to change of the Bristol Rheumatoid Arthritis Fatigue scales                                                                                                                                                                      | Rheumatology              | 2013 | 52(10)       | 832-1839  |
| 46 FSS               | Gao L, et al.             | Psychometric properties of the Chinese version of Arthritis Self-Efficacy Scale-8 (ASES-8) in a rheumatoid arthritis population                                                                                                                               | Rheumatol Int             | 2017 | 37(5)        | 751-756   |
|                      | Gao L, et al.             | Validity and Reliability of the Chinese Version of FACIT-F and BRAF-MDQ in Rheumatoid Arthritis Patients                                                                                                                                                      | Chinese General Practice  | 2019 | 22(17)       | 1111-2115 |
| 47 MFI               | Pouchot J, et al.         | Determination of the minimal clinically important difference for seven fatigue measures in rheumatoid arthritis                                                                                                                                               | J Clin Epidemiol          | 2008 | 61(7)        | 705-713   |
|                      | Mancuso CA, et al.        | Association Between Measures of Fatigue and Health-Related Quality of Life in Rheumatoid Arthritis and Osteoarthritis                                                                                                                                         | Patient                   | 2008 | 1(2)         | 97-104    |
| 48 POMS-Fatigue      | Mancuso CA, et al.        | Psychosocial variables and fatigue: a longitudinal study comparing individuals with rheumatoidarthritis and healthy controls.                                                                                                                                 | J Rheumatol               | 2006 | 33(8)        | 1496-1502 |
|                      | Pouchot J, et al.         | Determination of the minimal clinically important difference for seven fatigue measures in rheumatoid arthritis                                                                                                                                               | J Clin Epidemiol          | 2008 | 61(7)        | 705-713   |
| 49 PROMIS Fatigue 4a | Belza BL                  | Comparison of self-reported fatigue in rheumatoid arthritis and controls                                                                                                                                                                                      | J Rheumatol               | 1995 | 22(4)        | 639-643   |
|                      | Belza BL, et al.          | Correlates of fatigue in older adults with rheumatoid arthritis                                                                                                                                                                                               | Nurs Res                  | 1993 | 42(2)        | 93-99     |
| 50 FACIT-F           | Cella D, et al.           | Validation of the Functional Assessment of Chronic Illness Therapy Fatigue Scale Relative to Other Instrumentation in Patients with Rheumatoid Arthritis                                                                                                      | J Rheumatol               | 2005 | 32(5)        | 811-819   |
|                      | Jump RL, et al.           | History of affective disorder and the experience of fatigue in rheumatoid arthritis                                                                                                                                                                           | Arthritis Rheum           | 2004 | 51(2)        | 239-245   |
| 51 SF-MPQ            | Pouchot J, et al.         | Determination of the minimal clinically important difference for seven fatigue measures in rheumatoid arthritis                                                                                                                                               | J Clin Epidemiol          | 2008 | 61(7)        | 705-713   |
|                      | Wolfe F                   | Fatigue Assessments in Rheumatoid Arthritis: Comparative Performance of Visual Analog Scales and Longer Fatigue Questionnaires in 7760 Patients                                                                                                               | J Rheumatol               | 2004 | 31(10)       | 896-1902  |
| 52 SF-MPQ            | Pouchot J, et al.         | Determination of the minimal clinically important difference for seven fatigue measures in rheumatoid arthritis                                                                                                                                               | J Clin Epidemiol          | 2008 | 61(7)        | 705-713   |
|                      | Balsamo S, et al.         | Exercise and Fatigue in Rheumatoid Arthritis                                                                                                                                                                                                                  | Isr Med Assoc J           | 2014 | 16(1)        | 57-60     |
| 53 SF-MPQ            | Belza BL                  | Comparison of self-reported fatigue in rheumatoid arthritis and controls                                                                                                                                                                                      | J Rheumatol               | 1995 | 22(4)        | 639-643   |
|                      | Dures EK, et al.          | Reliability and sensitivity to change of the Bristol Rheumatoid Arthritis Fatigue scales                                                                                                                                                                      | Rheumatology              | 2013 | 52(10)       | 832-1839  |
| 54 SF-MPQ            | Jamison M, et al.         | Correlates of Falls and Fear of Falling Among Adults With Rheumatoid Arthritis                                                                                                                                                                                | Arthritis Rheum           | 2003 | 49(5)        | 673-680   |
|                      | Tack BB                   | Self-Reported Fatigue in Rheumatoid Arthritis. A pilot study                                                                                                                                                                                                  | Arthritis Care Res        | 1990 | 3(3)         | 154-157   |
| 55 SF-MPQ            | Bingham III CO, et al.    | PROMIS Fatigue short forms are reliable and valid in adults with rheumatoid arthritis                                                                                                                                                                         | J Patient Rep Outcomes    | 2019 | 3(1)         | 14        |

|    |                   |                                                                                                                                                                                          |                                                                                                                                                                                                                                                                                                                                                                                                                                                                                                                                                                                                                                                                                                                                                                                                                                                                                                                                                                                                                                                                                                                                                                                                                                                                                                        |                                                                                                                                                                                  |                                                                      |                                                                                                                              |
|----|-------------------|------------------------------------------------------------------------------------------------------------------------------------------------------------------------------------------|--------------------------------------------------------------------------------------------------------------------------------------------------------------------------------------------------------------------------------------------------------------------------------------------------------------------------------------------------------------------------------------------------------------------------------------------------------------------------------------------------------------------------------------------------------------------------------------------------------------------------------------------------------------------------------------------------------------------------------------------------------------------------------------------------------------------------------------------------------------------------------------------------------------------------------------------------------------------------------------------------------------------------------------------------------------------------------------------------------------------------------------------------------------------------------------------------------------------------------------------------------------------------------------------------------|----------------------------------------------------------------------------------------------------------------------------------------------------------------------------------|----------------------------------------------------------------------|------------------------------------------------------------------------------------------------------------------------------|
| 30 | PROMIS Fatigue 7a | Bartlett SJ, et al.<br>Bingham III CO, et al.                                                                                                                                            | Combining online and in-person methods to evaluate the content validity of PROMIS fatigue short forms in rheumatoid arthritis<br>PROMIS Fatigue short forms are reliable and valid in adults with rheumatoid arthritis                                                                                                                                                                                                                                                                                                                                                                                                                                                                                                                                                                                                                                                                                                                                                                                                                                                                                                                                                                                                                                                                                 | Qual Life Res<br>J Patient Rep Outcomes                                                                                                                                          | 2018<br>2019                                                         | 27(9) 443-2451<br>3(1) 14                                                                                                    |
| 31 | PROMIS Fatigue 8a | Bartlett SJ, et al.<br>Bingham III CO, et al.                                                                                                                                            | Combining online and in-person methods to evaluate the content validity of PROMIS fatigue short forms in rheumatoid arthritis<br>PROMIS Fatigue short forms are reliable and valid in adults with rheumatoid arthritis                                                                                                                                                                                                                                                                                                                                                                                                                                                                                                                                                                                                                                                                                                                                                                                                                                                                                                                                                                                                                                                                                 | Qual Life Res<br>J Patient Rep Outcomes                                                                                                                                          | 2018<br>2019                                                         | 27(9) 443-2451<br>3(1) 14                                                                                                    |
| 32 | SVS               | Rouse PC, et al.                                                                                                                                                                         | Measuring the positive psychological wellbeing of people with rheumatoid arthritis: a cross-sectional validation of the subjective vitality scale                                                                                                                                                                                                                                                                                                                                                                                                                                                                                                                                                                                                                                                                                                                                                                                                                                                                                                                                                                                                                                                                                                                                                      | Arthritis Res Ther                                                                                                                                                               | 2015                                                                 | 17 32                                                                                                                        |
| 33 | AIMS2-SF          | Aksary-Ashiani AR, et al.<br>Guillemin F, et al.<br>Haavardsholm EA, et al.<br>Josefsson KA, et al.<br>Negahban H, et al.<br>Taal E, et al.                                              | Translation and validation of the Persian version of the Arthritis Impact Measurement Scales 2-Short Form (AIMS2-SF) in patients with rheumatoid arthritis<br>THE AIMS2-SF: A Short Form of the Arthritis Impact Measurement Scales 2<br>A comparison of agreement and sensitivity to change between AIMS2 and a short form of AIMS2 (AIMS2-SF) in more than 1,000 rheumatoid arthritis patients<br>Swedish version of the multi dimensional health assessment questionnaire – translation and psychometric evaluation<br>Reliability, validity, and responsiveness of the Persian version of the rheumatoid and arthritis outcome score (RAOS) in patients with rheumatoid arthritis<br>Psychometric properties of a Dutch short form of the Arthritis Impact Measurement Scales 2 (Dutch-AIMS2-SF)                                                                                                                                                                                                                                                                                                                                                                                                                                                                                                   | Clin Rheumatol<br>Arthritis Rheum<br>J Rheumatol<br>BMC Musculoskelet Disord<br>Clin Rheumatol<br>Rheumatology                                                                   | 2009<br>1997<br>2000<br>2013<br>2015                                 | 28(12) 521-527<br>40(7) 267-1274<br>27(12) 810-2816<br>14 178<br>34(1) 35-42<br>42(3) 427-434                                |
| 34 | CES-D             | Taal E, et al.<br>ten Klooster PM, et al.<br>Blalock SJ, et al.<br>Callahan LF, et al.<br>Cho MJ, et al.<br>Covic T, et al.<br>Covic T, et al.<br>McQuillan J, et al.<br>Rhee SH, et al. | Sensitivity to change of AIMS2 and AIMS2-SF components in comparison to M-HAQ and VAS-pain<br>Confirmatory Factor Analysis of the Arthritis Impact Measurement Scales 2 Short Form in Patients With Rheumatoid Arthritis<br>Validity of the Center for Epidemiological Studies Depression Scale in Arthritis Population<br>The Beck Depression Inventory, Center for Epidemiological Studies Depression Scale (CES-D), and General Well-Being Schedule Depression Subscale in Rheumatoid Arthritis<br>Concordance between two measures of depression in the Hispanic Health and Nutrition Examination Survey<br>A longitudinal evaluation of the Center for Epidemiologic Studies-Depression scale (CES-D) in a Rheumatoid Arthritis Population using Rasch Analysis<br>Variability in depression prevalence in early rheumatoid arthritis: a comparison of the CES-D and HAD-D Scales<br>A comparison of self-reports of distress and affective disorder diagnoses in rheumatoid arthritis: A receiver operator characteristic analysis<br>A Confirmatory Factor Analysis of the Center for Epidemiologic Studies Depression Scale in Rheumatoid Arthritis Patients: Additional Evidence for a Four-Factor Model                                                                                      | Ann Rheum Dis<br>Arthritis Rheum<br>Arthritis Rheum<br>Arthritis Care Res<br>Soc Psychiatry Psychiatr Epide<br>Health Qual Life Outcomes<br>BMC Musculoskelet Disord             | 2008<br>1989<br>1991<br>1993<br>2007<br>2009                         | 59(5) 692-698<br>32(8) 991-997<br>4(1) 3-11<br>28(4) 156-163<br>5(41) 1-8<br>10(18) 1-9                                      |
| 35 | CSHQ-RA           | Chiu CF, et al.<br>Chiu CF, et al.<br>Russak SM, et al.<br>Weisman MH, et al.                                                                                                            | Development and Validation of the Revised Cedars-Sinai Health-Related Quality of Life for Rheumatoid Arthritis Instrument<br>Revalidation of the Original Cedars-Sinai Health-Related Quality of Life in Rheumatoid Arthritis Questionnaire<br>Validation of a Rheumatoid Arthritis Health-Related Quality of Life Instrument, the CSHQ-RA<br>Development of a New Instrument for Rheumatoid Arthritis: The Cedars-Sinai Health-Related Quality of Life Instrument (CSHQ-RA)                                                                                                                                                                                                                                                                                                                                                                                                                                                                                                                                                                                                                                                                                                                                                                                                                           | Arthritis Rheum<br>J Rheumatol<br>Arthritis Rheum<br>Arthritis Rheum                                                                                                             | 2006<br>2006<br>2003<br>2003                                         | 55(6) 856-863<br>33(2) 256-262<br>49(6) 798-803<br>49(1) 78-84                                                               |
| 36 | DASS              | Covic T, et al.                                                                                                                                                                          | Depression and Anxiety in Patients with Rheumatoid Arthritis: Prevalence rates based on a comparison of the Depression, Anxiety and Stress Scale (DASS) and the Hospital, Anxiety and Depression Scale (HADS)                                                                                                                                                                                                                                                                                                                                                                                                                                                                                                                                                                                                                                                                                                                                                                                                                                                                                                                                                                                                                                                                                          | BMC Psychiatry                                                                                                                                                                   | 2012                                                                 | 12 6                                                                                                                         |
| 37 | EIS               | Sinclair VG & Dowdy SW                                                                                                                                                                   | Development and validation of Emotional Intimacy Scale                                                                                                                                                                                                                                                                                                                                                                                                                                                                                                                                                                                                                                                                                                                                                                                                                                                                                                                                                                                                                                                                                                                                                                                                                                                 | J Nurs Meas                                                                                                                                                                      | 2005                                                                 | 13(3) 193-206                                                                                                                |
| 38 | HADS              | Covic T, et al.<br>Covic T, et al.<br>Gao L, et al.<br>Hill J, et al.<br>Kojima M, et al.<br>Lindgren S, et al.<br>Rouse PC, et al.<br>Suarez-Mendoza AA, et al.<br>Traki L, et al.      | Depression and Anxiety in Patients with Rheumatoid Arthritis: Prevalence rates based on a comparison of the Depression, Anxiety and Stress Scale (DASS) and the Hospital, Anxiety and Depression Scale (HADS)<br>Variability in depression prevalence in early rheumatoid arthritis: a comparison of the CES-D and HAD-D Scales<br>Psychometric properties of the Chinese version of Arthritis Self-Efficacy Scale-8 (ASES-8) in a rheumatoid arthritis population<br>The arthritis impact measurement scales: an anglicized version to assess the outcome of British patients with rheumatoid arthritis<br>Psychosocial factors, disease status, and quality of life in patients with rheumatoid arthritis<br>The Swedish version of the Multidimensional Health Locus of Control scales, Form C. Aspects of reliability and validity in patients with rheumatoid arthritis<br>Measuring the positive psychological wellbeing of people with rheumatoid arthritis: a cross-sectional validation of the subjective vitality scale<br>Measurement of Depression in Mexican Patients with Rheumatoid Arthritis: Validity of the Beck Depression Inventory<br>Responsiveness of the EuroQoL EQ-5D and Hospital Anxiety and Depression Scale (HADS) in rheumatoid arthritis patients receiving tocilizumab | BMC Psychiatry<br>BMC Musculoskelet Disord<br>Rheumatol Int<br>Br J Rheumatol<br>J Psychosom Res<br>Adv Physiother<br>Arthritis Res Ther<br>Arthritis Care Res<br>Clin Rheumatol | 2012<br>2009<br>2017<br>1990<br>2009<br>2007<br>2015<br>1997<br>2014 | 12 6<br>10 18<br>37(5) 751-756<br>29(3) 193-196<br>67(5) 425-431<br>9(1) 16-22<br>17 312<br>10(3) 194-199<br>33(8) 1055-1060 |
| 39 | PVS               | Sinclair VG & Wallston KA<br>Sinclair VG & Wallston KA                                                                                                                                   | Psychological Vulnerability Predicts Increases in Depressive Symptoms in Individuals With Rheumatoid Arthritis<br>The Development and Validation of the Psychological Vulnerability Scale                                                                                                                                                                                                                                                                                                                                                                                                                                                                                                                                                                                                                                                                                                                                                                                                                                                                                                                                                                                                                                                                                                              | Nurs Res<br>Cognit Ther Res<br>Arthritis Rheum                                                                                                                                   | 2010<br>1999<br>2004                                                 | 59(2) 140-146<br>23(2) 119-129<br>51(3) 350-357                                                                              |
| 40 | WHOQoL-Bref       | Taylor WJ, et al.                                                                                                                                                                        | Quality of life of people with rheumatoid arthritis as measured by the World Health Organization Quality of Life Instrument, short form (WHOQOL-BREF): score distributions and psychometric properties.                                                                                                                                                                                                                                                                                                                                                                                                                                                                                                                                                                                                                                                                                                                                                                                                                                                                                                                                                                                                                                                                                                | J Rheumatol                                                                                                                                                                      | 2014                                                                 | 41(1) 31-40                                                                                                                  |
| 41 | AIS               | Westhovens R, et al.                                                                                                                                                                     | Sleep Problems in Patients with Rheumatoid Arthritis                                                                                                                                                                                                                                                                                                                                                                                                                                                                                                                                                                                                                                                                                                                                                                                                                                                                                                                                                                                                                                                                                                                                                                                                                                                   | J Clin Epidemiol                                                                                                                                                                 | 1988                                                                 | 41(4) 313-321                                                                                                                |
| 42 | JSS               | Jenkins DC, et al.                                                                                                                                                                       | A scale for the estimation of sleep problems in clinical research                                                                                                                                                                                                                                                                                                                                                                                                                                                                                                                                                                                                                                                                                                                                                                                                                                                                                                                                                                                                                                                                                                                                                                                                                                      | Ann Rheum Dis                                                                                                                                                                    | 2010                                                                 | 69(10) 768-1773                                                                                                              |
| 43 | MOS-Sleep         | Wells G, et al.                                                                                                                                                                          | Investigation into the impact of abatacept on sleep quality in patients with rheumatoid arthritis, and the validity of the MOS-Sleep questionnaire Sleep Disturbance Scale                                                                                                                                                                                                                                                                                                                                                                                                                                                                                                                                                                                                                                                                                                                                                                                                                                                                                                                                                                                                                                                                                                                             | Open Rheumatol J                                                                                                                                                                 | 2008                                                                 | 2 64-70                                                                                                                      |
| 44 | ABES              | Boyington JE, et al.                                                                                                                                                                     | Factor Structure of the Arthritis Body Experience Scale (ABES) in a U.S. Population of People with Osteoarthritis (OA), Rheumatoid Arthritis (RA), Fibromyalgia (FM) and Other Rheumatic Conditions                                                                                                                                                                                                                                                                                                                                                                                                                                                                                                                                                                                                                                                                                                                                                                                                                                                                                                                                                                                                                                                                                                    | Arthritis Rheum                                                                                                                                                                  | 2005                                                                 | 53(3) 418-422                                                                                                                |
| 45 | FIS               | Helliwell P, et al.<br>Woodburn J, et al.<br>Woodburn J, et al.                                                                                                                          | Development of a Foot Impact Scale for Rheumatoid Arthritis<br>Adaptation and Crosscultural Validation of the Foot Impact Scale for Rheumatoid Arthritis Using Rasch Analysis<br>Rasch analysis of Dutch-translated version of the Foot Impact Scale for rheumatoid arthritis                                                                                                                                                                                                                                                                                                                                                                                                                                                                                                                                                                                                                                                                                                                                                                                                                                                                                                                                                                                                                          | Arthritis Care Res<br>Rheumatology                                                                                                                                               | 2012<br>2011                                                         | 64(7) 986-992<br>50(7) 315-1319                                                                                              |
| 46 | PDQ-SF            | Julian L, et al.                                                                                                                                                                         | Validity of Brief Screening Tools for Cognitive Impairment in Rheumatoid Arthritis and Systemic Lupus Erythematosus                                                                                                                                                                                                                                                                                                                                                                                                                                                                                                                                                                                                                                                                                                                                                                                                                                                                                                                                                                                                                                                                                                                                                                                    | Arthritis Care Res                                                                                                                                                               | 2012                                                                 | 64(3) 448-454                                                                                                                |
| 47 | RADAI-5           | Bossert M, et al.<br>Leeb BF, et al.<br>Leeb BF, et al.<br>Rintelen B, et al.<br>Rintelen B, et al.                                                                                      | Evaluation of self-report questionnaires for assessing rheumatoid arthritis activity: a cross-sectional study of RAPID3 and RADAI5 and flare detection in 200 patients<br>Patient-centered rheumatoid arthritis disease activity assessment by a modified RADAI<br>A comparison of patient questionnaires and composite indexes in routine care of rheumatoid arthritis patients<br>Remission in rheumatoid arthritis: a comparison of the 2 newly proposed ACR/EULAR remission criteria with the rheumatoid arthritis disease activity index-5, a patient self-report disease activity index<br>The rheumatoid arthritis disease activity index-5 in daily use. Proposal for disease activity categories                                                                                                                                                                                                                                                                                                                                                                                                                                                                                                                                                                                              | Joint Bone Spine<br>J Rheumatol<br>Joint Bone Spine<br>J Rheumatol<br>J Rheumatol                                                                                                | 2012<br>2008<br>2009<br>2013<br>2009                                 | 79(1) 57-62<br>35(7) 294-1299<br>76(6) 658-64<br>40(4) 394-400<br>36(5) 918-924                                              |
| 48 | RASQ              | Salaffi F, et al.<br>Sunar I, et al.<br>Uhlrig T, et al.                                                                                                                                 | New Indices study group. The comparative responsiveness of the patient self-report questionnaires and composite disease indices for assessing rheumatoid arthritis activity in routine care<br>Translation and validation of the Turkish language version of the Rheumatoid Arthritis Disease Activity Index-5<br>Test-retest reliability of disease activity core set measures and indices in rheumatoid arthritis                                                                                                                                                                                                                                                                                                                                                                                                                                                                                                                                                                                                                                                                                                                                                                                                                                                                                    | Clin Exp Rheumatol<br>Int J Rheum Dis<br>Ann Rheum Dis                                                                                                                           | 2012<br>2017<br>2009                                                 | 30(6) 912-921<br>20(12) D12-2019<br>68(6) 972-975                                                                            |
| 49 | SF-12             | Banderas B, et al.<br>Banderas B, et al.                                                                                                                                                 | Development of the Rheumatoid Arthritis Symptom Questionnaire (RASQ): a patient reported outcome scale for measuring symptoms of rheumatoid arthritis<br>Psychometric evaluation of the Rheumatoid Arthritis Symptom Questionnaire (RASQ) in an observational study                                                                                                                                                                                                                                                                                                                                                                                                                                                                                                                                                                                                                                                                                                                                                                                                                                                                                                                                                                                                                                    | Curr Med Res Opin<br>Curr Med Res Opin                                                                                                                                           | 2017<br>2017                                                         | 33(9) 643-1651<br>33(12) 121-2128                                                                                            |
| 50 | EDAQ              | Hitsu M, et al.<br>Hurst NP, et al.                                                                                                                                                      | An empirical evaluation of the SF-12, SF-6D, EQ-5D and Michigan Hand Outcome Questionnaire in patients with rheumatoid arthritis of the hand<br>Psychometric validation of Chinese Health Assessment Questionnaire for use in rheumatoid arthritis patients in China<br>Comparison of the MOS short form-12 (SF12) health status questionnaire with the SF36 in patients with rheumatoid arthritis                                                                                                                                                                                                                                                                                                                                                                                                                                                                                                                                                                                                                                                                                                                                                                                                                                                                                                     | Health Qual Life Outcomes<br>Int J Rheum Dis<br>Br J Rheumatol                                                                                                                   | 2017<br>2017<br>1998                                                 | 15(1) 20<br>20(12) 987-1992<br>37(9) 862-869                                                                                 |
| 51 | IPAQ-SF           | Hammond A, et al.<br>Hammond A, et al.                                                                                                                                                   | Linguistic validation and cultural adaptation of an English version of the Evaluation of Daily Activity Questionnaire in rheumatoid arthritis<br>The reliability and validity of the English version of the Evaluation of Daily Activity Questionnaire for people with rheumatoid arthritis                                                                                                                                                                                                                                                                                                                                                                                                                                                                                                                                                                                                                                                                                                                                                                                                                                                                                                                                                                                                            | Health Qual Life Outcomes<br>Rheumatology                                                                                                                                        | 2014<br>2015                                                         | 12 143<br>54(9) 1605-1615                                                                                                    |
| 52 | ROAD              | Tierneya M, et al.<br>Salaffi F, et al.<br>Salaffi F, et al.<br>Salaffi F, et al.<br>Salaffi F, et al.                                                                                   | Criterion validity of the International Physical Activity Questionnaire Short Form (IPAQ-SF) for use in patients with rheumatoid arthritis: comparison with the SenseWear Armband<br>Classical test theory and Rasch analysis validation of the Recent-Onset Arthritis Disability questionnaire in rheumatoid arthritis patients<br>Comparison of the Recent-Onset Arthritis Disability questionnaire with the Health Assessment Questionnaire disability index in patients with rheumatoid arthritis.<br>Development of a functional disability measurement tool to assess early arthritis: the Recent-Onset Arthritis Disability (ROAD) questionnaire.<br>Measuring functional disability in early rheumatoid arthritis: the validity, reliability and responsiveness of the Recent-Onset Arthritis Disability (ROAD) index<br>The use of computer touch-screen technology for the collection of patient-reported outcome data in rheumatoid arthritis: comparison with standardized paper questionnaires                                                                                                                                                                                                                                                                                            | Physiotherapy<br>Clin Rheumatol<br>Clin Exp Rheumatol<br>Clin Exp Rheumatol<br>Clin Exp Rheumatol                                                                                | 2015<br>2013<br>2010<br>2005<br>2005                                 | 101(2) 193-197<br>32(2) 211-217<br>28(6) 855-865<br>23(5) 628-636<br>3(5 Suppl 39) 531-42                                    |
| 53 | WHODAS-II         | Salaffi F, et al.<br>Meesters JJ, et al.<br>Lee JY, et al.                                                                                                                               | Validity and responsiveness of the World Health Organization Disability Assessment Schedule II to assess disability in rheumatoid arthritis patients<br>Cultural Adaptation of a Compliance Questionnaire for Patients with Rheumatoid Arthritis to a Korean Version                                                                                                                                                                                                                                                                                                                                                                                                                                                                                                                                                                                                                                                                                                                                                                                                                                                                                                                                                                                                                                   | Clin Exp Rheumatol<br>Rheumatology<br>Korean J Intern Med                                                                                                                        | 2009<br>2010<br>2011                                                 | 27(3) 459-468<br>49(2) 326-333<br>26(1) 28-33                                                                                |
| 54 | CRQ               | Salgado E, et al.                                                                                                                                                                        | Cultural Adaptation and Validation of the English version of the compliance questionnaire in rheumatology                                                                                                                                                                                                                                                                                                                                                                                                                                                                                                                                                                                                                                                                                                                                                                                                                                                                                                                                                                                                                                                                                                                                                                                              | Rheumatology International                                                                                                                                                       | 2018                                                                 | 38(3) 467-472                                                                                                                |
| 55 | CRQ-5             | Hughes LD, et al.<br>Ometto F, et al.                                                                                                                                                    | A 5 Item version of the Compliance Questionnaire for Rheumatology (CRQ5) successfully identifies low adherence to DMARDs<br>Adherence in rheumatoid arthritis patients assessed with a validated Italian version of the 5-Item Compliance Questionnaire for Rheumatology                                                                                                                                                                                                                                                                                                                                                                                                                                                                                                                                                                                                                                                                                                                                                                                                                                                                                                                                                                                                                               | BMC Musculoskelet Disord<br>Clin Exp Rheumatol                                                                                                                                   | 2013<br>2019                                                         | 14 286<br>37(6) 915-922                                                                                                      |
| 56 | MARS-5            | De Cupper E, et al.                                                                                                                                                                      | Determinants of methotrexate adherence in rheumatoid arthritis patients                                                                                                                                                                                                                                                                                                                                                                                                                                                                                                                                                                                                                                                                                                                                                                                                                                                                                                                                                                                                                                                                                                                                                                                                                                | Clin Rheumatol                                                                                                                                                                   | 2016                                                                 | 35(5) 335-1339                                                                                                               |
| 57 | MARS-9            | Salt E, et al.                                                                                                                                                                           | Psychometric properties of three medication adherence scales in patients with rheumatoid arthritis                                                                                                                                                                                                                                                                                                                                                                                                                                                                                                                                                                                                                                                                                                                                                                                                                                                                                                                                                                                                                                                                                                                                                                                                     | J Nurs Meas                                                                                                                                                                      | 2012                                                                 | 20(1) 20-11                                                                                                                  |
| 58 | MAS               | Salt E, et al.                                                                                                                                                                           | Psychometric properties of three medication adherence scales in patients with rheumatoid arthritis                                                                                                                                                                                                                                                                                                                                                                                                                                                                                                                                                                                                                                                                                                                                                                                                                                                                                                                                                                                                                                                                                                                                                                                                     | J Nurs Meas                                                                                                                                                                      | 2012                                                                 | 20(1) 59-72                                                                                                                  |
| 59 | SFA               | van den Ende CH, et al.<br>Vermeulen HM, et al.                                                                                                                                          | Assessment of shoulder function in rheumatoid arthritis<br>Responsiveness of the shoulder function assessment scale in patients with rheumatoid arthritis                                                                                                                                                                                                                                                                                                                                                                                                                                                                                                                                                                                                                                                                                                                                                                                                                                                                                                                                                                                                                                                                                                                                              | J Rheumatol<br>Ann Rheum Dis                                                                                                                                                     | 1996<br>2006                                                         | 23(12) D43-2048<br>65(2) 239-241                                                                                             |
| 60 | EWPS              | Tang K, et al.                                                                                                                                                                           | Sensitivity of five at-work productivity measures was endorsed by patients with osteoarthritis or rheumatoid arthritis                                                                                                                                                                                                                                                                                                                                                                                                                                                                                                                                                                                                                                                                                                                                                                                                                                                                                                                                                                                                                                                                                                                                                                                 | J Clin Epidemiol                                                                                                                                                                 | 2013                                                                 | 66(5) 546-556                                                                                                                |
| 61 | RA-WIS            | Gilworth G, et al.                                                                                                                                                                       | Adaptation and cross-cultural validation of the rheumatoid arthritis work instability scale (RA-WIS)                                                                                                                                                                                                                                                                                                                                                                                                                                                                                                                                                                                                                                                                                                                                                                                                                                                                                                                                                                                                                                                                                                                                                                                                   | Ann Rheum Dis                                                                                                                                                                    | 2009                                                                 | 68(11) 886-1690                                                                                                              |

|    |                          |                                                                                                                                                                                                                                                             |                           |      |                |           |
|----|--------------------------|-------------------------------------------------------------------------------------------------------------------------------------------------------------------------------------------------------------------------------------------------------------|---------------------------|------|----------------|-----------|
|    | Gilworth G, et al.       | Development of a Work Instability Scale for Rheumatoid Arthritis                                                                                                                                                                                            | Arthritis Rheum           | 2003 | 49(3)          | 349-354   |
|    | Revicki D, et al.        | Reliability and Validity of the Work Instability Scale for Rheumatoid Arthritis                                                                                                                                                                             | Value Health              | 2015 | 18(8)          | 1008-1015 |
|    | Tang K, et al.           | Disease-Related Differential Item Functioning in the Work Instability Scale for Rheumatoid Arthritis: Converging Results From Three Methods                                                                                                                 | Arthritis Care Res        | 2011 | 63(8)          | 159-1169  |
|    | Tang K, et al.           | Sensibility of five at-work productivity measures was endorsed by patients with osteoarthritis or rheumatoid arthritis                                                                                                                                      | J Clin Epidemiol          | 2013 | 66(5)          | 546-556   |
| 62 | SFS-6                    | Sensibility of five at-work productivity measures was endorsed by patients with osteoarthritis or rheumatoid arthritis                                                                                                                                      | J Clin Epidemiol          | 2013 | 66(5)          | 546-556   |
| 63 | VOLP                     | Development of a Composite Questionnaire, the Valuation of Lost Productivity, to Value Productivity Losses: Application in Rheumatoid Arthritis                                                                                                             | Value Health              | 2012 | 15(1)          | 46-54     |
|    | Zhang W, et al.          | Measuring Time Input Loss Among Patients With Rheumatoid Arthritis: Validity and Reliability of the Valuation of Lost Productivity Questionnaire                                                                                                            | J Occup Environ Med       | 2011 | 53(5)          | 530-536   |
| 64 | WALS                     | Sensibility of five at-work productivity measures was endorsed by patients with osteoarthritis or rheumatoid arthritis                                                                                                                                      | J Clin Epidemiol          | 2013 | 66(5)          | 546-556   |
| 65 | WFun                     | Validity and responsiveness of the Work Functioning Impairment Scale (WFun) in rheumatoid arthritis patients: A multicenter prospective study                                                                                                               | Mod Rheumatol             | 2020 | 30(5)          | 821-827   |
| 66 | WLQ                      | Sensibility of five at-work productivity measures was endorsed by patients with osteoarthritis or rheumatoid arthritis                                                                                                                                      | J Clin Epidemiol          | 2013 | 66(5)          | 546-556   |
|    | Walker N, et al.         | Work limitations among working persons with rheumatoid arthritis: results, reliability, and validity of the work limitations questionnaire in 836 patients                                                                                                  | J Rheumatol               | 2005 | 32(6)          | 1006-1012 |
| 67 | ABILHAND                 | Can manual ability be measured with a generic ABILHAND scale? A cross-sectional study conducted on six diagnostic groups                                                                                                                                    | BMJ Open                  | 2012 | 2              | e001807   |
|    | Arnould C, et al.        | Reliability and validity of the Turkish version of the ABILHAND questionnaire in rheumatoid arthritis individuals, based on rasch analysis                                                                                                                  | Arch Rheumatol            | 2019 | 34(4)          | 395-405   |
|    | Başakçı Çalk B, et al.   | Responsiveness of the ABILHAND Questionnaire in Measuring Changes in Rheumatoid Arthritis Patients                                                                                                                                                          | Arthritis Care Res        | 2011 | 63(1)          | 135-141   |
|    | Batcho CS, et al.        | Validation of the ABILHAND questionnaire as a measure of manual ability in patients with rheumatoid arthritis                                                                                                                                               | Ann Rheum Dis             | 2007 | 66(8)          | 1098-1105 |
|    | Durez P, et al.          | ABILHAND: A Rasch-Built Measure of Manual Ability                                                                                                                                                                                                           | Arch Phys Med Rehabil     | 1998 | 79(9)          | 1038-1042 |
|    | Penta M, et al.          | Generic ABILHAND questionnaire can measure manual ability across a variety of motor impairments                                                                                                                                                             | Int J Rehabil Res         | 2011 | 34(2)          | 131-140   |
| 68 | CHFS                     | Translation, cultural adaptation and reproducibility of the Cochin Hand Functional Scale questionnaire for Brazil                                                                                                                                           | Clinics                   | 2011 | 66(5)          | 731-736   |
|    | Chiari A, et al.         | Development and validation of a rheumatoid hand functional disability scale that assesses functional handicap.                                                                                                                                              | J Rheumatol               | 1996 | 23(7)          | 1167-72   |
|    | Durazlı MT, et al.       | Responsiveness of the Cochin rheumatoid hand disability scale after surgery                                                                                                                                                                                 | Rheumatology              | 2001 | 40(8)          | 843-850   |
|    | Lefevre-Colau MM, et al. | Cross-cultural adaptation and validation of the Michigan Hand Outcomes Questionnaire (MHQ) for Brazil: validation study                                                                                                                                     | Sao Paulo Med J           | 2014 | 132(6)         | 339-347   |
|    | Meireles SM, et al.      | The Ability of the Cochin Rheumatoid Arthritis Hand Functional Scale to Detect Change During the Course of Disease                                                                                                                                          | Arthritis Care Res        | 2000 | 13(5)          | 296-303   |
|    | Poiraudou S, et al.      | Reliability and Validity of a Self-report of Hand Function in Persons with Rheumatoid Arthritis                                                                                                                                                             | J Hand Ther               | 2006 | 19(1)          | 12-6      |
| 69 | DASH                     | Disability of Arm Shoulder and Hand Questionnaire in rheumatoid arthritis patients: relationship with disease activity, HAQ, SF-36                                                                                                                          | Rheumatol Int             | 2011 | 31(6)          | 823-826   |
|    | Poolle JL, et al.        | Disability of the Arm, Shoulder and Hand Questionnaire in Swedish patients with Rheumatoid Arthritis : A validity study                                                                                                                                     | J Rehabil Med             | 2012 | 44(1)          | 7-11      |
|    | Aktekin LA, et al.       | Performance of the Disabilities of the Arm, Shoulder and Hand Outcome Questionnaire and the Moberg Picking Up Test in Patients With Finger Joint Arthroplasty                                                                                               | Arch Phys Med Rehabil     | 2006 | 87(2)          | 203-206   |
|    | Billberg A, et al.       | Specificity and responsiveness of patient-reported and clinician-rated outcome measures in the context of elbow surgery, comparing patients with and without rheumatoid arthritis                                                                           | Orthop Traumatol Surg Res | 2012 | 98(6)          | 652-658   |
|    | Chiari-Grisar C, et al.  | Linguistic validation, validity and reliability of the British English versions of the Disabilities of the Arm, Shoulder and Hand (DASH) questionnaire and QuickDASH in people with rheumatoid arthritis                                                    | BMC Musculoskelet Disord  | 2018 | 19             | 118       |
|    | Dawson J, et al.         | Translation, cultural adaptation and reproducibility of the Oxford Shoulder Score questionnaire for Brazil, among patients with rheumatoid arthritis                                                                                                        | Sao Paulo Med J           | 2016 | 134(1)         | 40-46     |
|    | Hammond A, et al.        | Construct validity, reliability, response rate, and association with disease activity of the quick disabilities of the arm, shoulder and hand questionnaire in the assessment of rheumatoid arthritis                                                       | Mod Rheumatol             | 2015 | 25(2)          | 241-245   |
|    | Limada Eda S, et al.     | Translation into Brazilian Portuguese, cultural adaptation and evaluation of the reliability of the Disabilities of the Arm, Shoulder and Hand Questionnaire                                                                                                | Braz J Med Biol Res       | 2005 | 38(2)          | 293-302   |
|    | Ochi K, et al.           | Revisiting the disabilities of the arm, shoulder and hand (DASH) and QuickDASH in rheumatoid arthritis                                                                                                                                                      | BMC Musculoskelet Disord  | 2019 | 20             | 41        |
|    | Orfale AG, et al.        | Relationship between roentgenographic joint destruction in the hands and functional disorders among patients with rheumatoid arthritis                                                                                                                      | J Rheumatol               | 2008 | 35(12)         | 12        |
|    | Proflinger B, et al.     | Adaptation and Validation of the Foot Function Index-Revised Short Form into Polish                                                                                                                                                                         | Mod Rheumatol             | 2017 | 27(5)          | 828-832   |
|    | Raven EE, et al.         | Psychometric evaluation of a Moroccan version of health assessment questionnaire for use in Moroccan patients with rheumatoid arthritis                                                                                                                     | Biomed Res Int            | 2017 | 2017           | 6051698   |
| 70 | FFI-RS                   | Responsiveness of Self-Report and Therapist-Rated Upper Extremity Structural Impairment and Functional Outcome Measures in Early Rheumatoid Arthritis                                                                                                       | Rheumatol Int             | 2008 | 28(12)         | 197-1203  |
| 71 | HAQ                      | Duration of rheumatoid arthritis influences the degree of functional improvement in clinical trials                                                                                                                                                         | Arthritis Care Res        | 2010 | 62(2)          | 274-278   |
|    | Adams J, et al.          | Treatment-related improvement in physical function varies with duration of rheumatoid arthritis: a pooled analysis of clinical trial results                                                                                                                | Ann Rheum Dis             | 2006 | 65(2)          | 227-233   |
|    | Aletaha D & Ward MM      | Short-term effects of the TNFA antagonist infliximab on the acute phase reaction and activities of daily life in patients with rheumatoid arthritis                                                                                                         | Ann Rheum Dis             | 2008 | 67(2)          | 238-243   |
|    | Aletaha D, et al.        | Rheumatoid Arthritis Severity Scale: a brief, physician-completed scale not confounded by patient self-report of psychological functioning                                                                                                                  | Scand J Clin Lab Invest   | 2007 | 67(3)          | 337-342   |
|    | Arvidson NG, et al.      | Real-World Anti-Tumor Necrosis Factor Treatment in Rheumatoid Arthritis, Psoriatic Arthritis, and Ankylosing Spondylitis: Cost-Effectiveness Based on Number Needed to Treat to Improve Health Assessment Questionnaire                                     | Rheumatology              | 2002 | 41(1)          | 38-45     |
|    | Bardwell WA, et al.      | Responsiveness of the ABILHAND Questionnaire in Measuring Changes in Rheumatoid Arthritis Patients                                                                                                                                                          | J Rheumatol               | 2009 | 36(7)          | 121-1428  |
|    | Barra L, et al.          | Profile and course of early rheumatoid arthritis in Morocco: a two-year follow-up study                                                                                                                                                                     | Arthritis Care Res        | 2011 | 63(1)          | 135-141   |
|    | Batcho CS, et al.        | Comparison of the Indian version of Health Assessment Questionnaire Score and Short Form 36 Physical Function Score in rheumatoid arthritis using Rasch analysis                                                                                            | BMC Musculoskelet Disord  | 2011 | 12             | 266       |
|    | Benbouazza K, et al.     | Validation and Crosscultural Adaptation of an Argentine Spanish Version of the Health Assessment Questionnaire Disability Index                                                                                                                             | Indian J Rheumatol        | 2008 | 3(2)           | 52-57     |
|    | Chogle AR, et al.        | Single-factor scoring validation for the Health Assessment Questionnaire-Disability Index (HAQ-DI) in patients with systemic sclerosis and comparison with early rheumatoid arthritis patients                                                              | J Clin Rheumatol          | 2004 | 10(3)          | 110-115   |
|    | Cleora G, et al.         | Validation of Single-Factor Structure and Scoring Protocol for the Health Assessment Questionnaire-Disability Index                                                                                                                                         | Qual Life Res             | 2006 | 15(8)          | 383-1394  |
|    | Cole JC, et al.          | Translation and cultural adaptation of quality of life questionnaires: an evaluation of methodology                                                                                                                                                         | Arthritis Rheum           | 2005 | 53(4)          | 536-542   |
|    | Cole JC, et al.          | Evaluation of the health assessment questionnaire disability index in Chilean patients with rheumatoid arthritis [Evaluación del health assessment questionnaire disability index (Haqdi) en pacientes chilenos con artritis reumatoide]                    | J Rheumatol               | 2003 | 30(2)          | 379-385   |
|    | Durán J, et al.          | Cross-cultural adaptation and validation of the French version of the Rheumatoid and Arthritis Outcome Score (RAOS)                                                                                                                                         | Revista Medica de Chile   | 2019 | 147(5)         | 612-617   |
|    | Duval A, et al.          | Cross-cultural adaptation and validation of an Arabic Health Assessment Questionnaire for use in rheumatoid arthritis patients                                                                                                                              | Clin Exp Rheumatol        | 2010 | 28(6)          | 806-812   |
|    | El Meidany YM, et al.    | Evaluating changes in health status: sensitivity to change of the modified Arabic health assessment questionnaire in patients with rheumatoid arthritis                                                                                                     | Joint Bone Spine          | 2003 | 70(3)          | 195-202   |
|    | El Meidany YM, et al.    | Ultrasound Doppler measurements predict success of treatment with anti-TNF- $\alpha$ drug in patients with rheumatoid arthritis: a prospective cohort study                                                                                                 | Joint Bone Spine          | 2003 | 70(6)          | 509-514   |
|    | Ellegaard K, et al.      | Importance of sensitivity to change as a criterion for selecting health status measures                                                                                                                                                                     | Rheumatology              | 2011 | 50(3)          | 506-512   |
|    | Fitzpatrick R, et al.    | The PROMIS of Better Outcome Assessment: Responsiveness, Floor and Ceiling Effects, and Internet Administration                                                                                                                                             | Qual Health Care          | 1992 | 1(2)           | 89-93     |
|    | Fries J, et al.          | Improved responsiveness and reduced sample size requirements of PROMIS physical function scales with item response theory                                                                                                                                   | J Rheumatol               | 2011 | 38(8)          | 759-1764  |
|    | Fries JF, et al.         | Cross-cultural adaptation and validation of the Malay health assessment questionnaire for use in rheumatoid arthritis                                                                                                                                       | Arthritis Res Ther        | 2011 | 13(5)          | R147      |
|    | Hussein H, et al.        | Validation of an Indian version of the Health Assessment Questionnaire in patients with rheumatoid arthritis                                                                                                                                                | Int J Rheum Dis           | 2008 | 11(3)          | 237-240   |
|    | Kumar A, et al.          | Health-Related Quality of Life: Validity, Reliability, and Responsiveness of SF-36, EQ-5D, EQ-5D, RAQoL, and HAQ in Patients with Rheumatoid Arthritis                                                                                                      | Rheumatology              | 2002 | 41(12)         | 1437-1459 |
|    | Linde L, et al.          | A comparison of generic, indirect utility measures (the HUI2, HUI3, SF-6D, and the EQ-5D) and disease-specific instruments (the RAQoL and the HAQ) in rheumatoid arthritis                                                                                  | J Rheumatol               | 2008 | 35(8)          | 528-1537  |
|    | Marra CA, et al.         | Are indirect utility measures reliable and responsive in rheumatoid arthritis patients?                                                                                                                                                                     | Soc Sci Med               | 2005 | 60(7)          | 571-1582  |
|    | Marra CA, et al.         | Validation of a Japanese Version of the Stanford Health Assessment Questionnaire in 3,763 Patients With Rheumatoid Arthritis                                                                                                                                | Qual Life Res             | 2005 | 14(5)          | 333-1344  |
|    | Matsuda Y, et al.        | Fatigue is a reliable, sensitive and unique outcome measure in rheumatoid arthritis                                                                                                                                                                         | Arthritis Rheum           | 2003 | 49(6)          | 784-788   |
|    | Minnock P, et al.        | Comprehensibility, reliability, validity, and responsiveness of the Thai version of the Health Assessment Questionnaire in Thai patients with rheumatoid arthritis                                                                                          | Rheumatology              | 2009 | 48(12)         | 533-1536  |
|    | Osiri M, et al.          | Evaluation of functional ability of Thai patients with rheumatoid arthritis by the use of a Thai version of the Health Assessment Questionnaire                                                                                                             | Arthritis Res Ther        | 2009 | 11(4)          | R129      |
|    | Osiri M, et al.          | The Minimally Important Difference for the Health Assessment Questionnaire in Rheumatoid Arthritis Clinical Practice Is Smaller Than in Randomized Controlled Trials                                                                                        | Rheumatology              | 2001 | 40(5)          | 555-558   |
|    | Pope JE, et al.          | A comparison of the Canadian Occupational Performance Measure and the Health Assessment Questionnaire                                                                                                                                                       | J Rheumatol               | 2009 | 36(2)          | 254-259   |
|    | Ripat J, et al.          | Test-Retest Reliability of Patient Global Assessment and Physician Global Assessment in Rheumatoid Arthritis                                                                                                                                                | Can J Occup Ther          | 2001 | 68(4)          | 247-253   |
|    | Rohekar G & Pope J       | Comparison of functional disability scales and their relevance to radiological progression in patients with rheumatoid arthritis in remission                                                                                                               | J Rheumatol               | 2009 | 36(10)         | 178-2182  |
|    | Sahin F, et al.          | Measuring functional disability in early rheumatoid arthritis: the validity, reliability and responsiveness of the Recent-Onset Arthritis Disability (ROAD) index                                                                                           | Clin Exp Rheumatol        | 2006 | 24(5)          | 540-545   |
|    | Salaffi F, et al.        | An open-source, self-explanatory touch screen in routine care: Validity of filling in the Bath measures on Ankylosing Spondylitis Disease Activity Index, Function Index, the Health Assessment Questionnaire and Visual Analogue Scales in comparison with | Clin Exp Rheumatol        | 2005 | 33(5 Suppl 39) | S31-42    |
|    | Schiffes DB & Hetland ML | The effects of disease-modifying anti-rheumatic drugs on the Health Assessment Questionnaire score. Lessons from leflunomide clinical trials database                                                                                                       | Rheumatology              | 2002 | 41(8)          | 899-909   |
|    | Scott DL & Strand V      | Measure of function in rheumatoid arthritis: individualized or classical scales?                                                                                                                                                                            | Ann Rheum Dis             | 2010 | 69(1)          | 97-101    |
|    | Seror R, et al.          | The adaptation, reliability and validity testing of the Estonian version of the Health Assessment Questionnaire's Disability Index                                                                                                                          | Rheumatol Int             | 2007 | 28(1)          | 51-59     |
|    | Tammaru M, et al.        | Using Rasch Analysis to Compare the Psychometric Properties of the Short Form 36 Physical Function Score and the Health Assessment Questionnaire Disability Index in Patients With Psoriatic Arthritis and Rheumatoid Arthritis                             | Arthritis Rheum           | 2007 | 57(5)          | 723-729   |
|    | Taylor WJ & McPherson KM | Quality of life of people with rheumatoid arthritis as measured by the World Health Organization Quality of Life Instrument, short form (WHOQOL-BREF): score distributions and psychometric properties.                                                     | Arthritis Rheum           | 2004 | 51(3)          | 350-357   |
|    | Taylor WJ, et al.        | Rasch Analysis of the Dutch Health Assessment Questionnaire Disability Index and the Health Assessment Questionnaire II in Patients With Rheumatoid Arthritis                                                                                               | Arthritis Rheum           | 2008 | 59(12)         | 721-1728  |
|    | ten Klooster PM, et al.  | Adaptation into Danish of the Stanford Health Assessment Questionnaire (HAQ) and the Rheumatoid Arthritis Quality of Life Scale (RAQoL)                                                                                                                     | Scand J Rheumatol         | 2001 | 30(2)          | 103-109   |
|    | Thorsen H, et al.        |                                                                                                                                                                                                                                                             |                           |      |                |           |

|  |                             |                                                                                                                                                                                                                                                               |                              |      |        |          |
|--|-----------------------------|---------------------------------------------------------------------------------------------------------------------------------------------------------------------------------------------------------------------------------------------------------------|------------------------------|------|--------|----------|
|  | Uhlig T, et al.             | Comparison of the Health Assessment Questionnaire (HAQ) and the modified HAQ (MHAQ) in patients with rheumatoid arthritis                                                                                                                                     | Rheumatology                 | 2006 | 45(4)  | 454-458  |
|  | Vaidya B, et al.            | Translation, cross-cultural adaptation and validation of Nepali version of Health Assessment Questionnaire-Disability Index in rheumatoid arthritis patients from Nepal                                                                                       | Int J Rheum Dis              | 2019 | 22(10) | 871-1876 |
|  | Van Groen MM, et al.        | Application of the health assessment questionnaire disability index to various rheumatic diseases                                                                                                                                                             | Qual Life Res                | 2010 | 19(9)  | 255-1263 |
|  | Veehof MM, et al.           | Comparison of Internal and External Responsiveness of the Generic Medical Outcome Study Short Form-36 (SF-36) with Disease-specific Measures in Rheumatoid Arthritis                                                                                          | J Rheumatol                  | 2008 | 35(4)  | 610-617  |
|  | Verhoeven AC, et al.        | Responsiveness of the core set, response criteria, and utilities in early rheumatoid arthritis                                                                                                                                                                | Ann Rheum Dis                | 2000 | 59(12) | 966-974  |
|  | Viermeulen JM, et al.       | Responsiveness of the shoulder function assessment scale in patients with rheumatoid arthritis                                                                                                                                                                | Ann Rheum Dis                | 2006 | 65(3)  | 239-242  |
|  | Weisscher N, et al.         | The Academic Medical Center Linear Disability Score Item Bank: Psychometric Properties of a New Generic Disability Measure in Rheumatoid Arthritis                                                                                                            | J Rheumatol                  | 2007 | 34(6)  | 222-1228 |
|  | Wells G, et al.             | Responsiveness of patient reported outcomes including fatigue, sleep quality, activity limitation, and quality of life following treatment with abatacept for rheumatoid arthritis                                                                            | Ann Rheum Dis                | 2008 | 67(2)  | 260-265  |
|  | Wikström J, et al.          | Reliability, validity and responsiveness of a new leisure index: The Patient-Specific Leisure Scale (PSLS)                                                                                                                                                    | Musculoskeletal Care         | 2009 | 7(3)   | 178-193  |
|  | Wolfe F                     | Which HAQ is best? A comparison of the HAQ, MHAQ and RA-HAQ, a difficult 8 item HAQ (DHAQ), and a rescored 20 item HAQ (HAQ20): analyses in 2,491 rheumatoid arthritis patients following leflunomide initiation                                              | J Rheumatol                  | 2001 | 28(5)  | 982-989  |
|  | Oude Voshaar MA, et al.     | Crosscultural Measurement Equivalence of the Health Assessment Questionnaire II                                                                                                                                                                               | Arthritis Care Res           | 2013 | 65(6)  | 900-1004 |
|  | ten Klooster PM, et al.     | Rasch Analysis of the Dutch Health Assessment Questionnaire Disability Index and the Health Assessment Questionnaire II in Patients With Rheumatoid Arthritis                                                                                                 | Arthritis Rheum              | 2008 | 59(12) | 721-1728 |
|  | Wolfe F, et al.             | Development and Validation of the Health Assessment Questionnaire II A Revised Version of the Health Assessment Questionnaire                                                                                                                                 | Arthritis Rheum              | 2004 | 50(10) | 296-3305 |
|  | Hammond A & Lincoln N       | Development of the Joint Protection Behavior Assessment                                                                                                                                                                                                       | Arthritis Care Res           | 1999 | 12(3)  | 200-207  |
|  | Niedermann A, et al.        | Development and Validation of a German Version of the Joint Protection Behavior Assessment in Patients With Rheumatoid Arthritis                                                                                                                              | Arthritis Rheum              | 2007 | 57(2)  | 249-255  |
|  | Tonga E, et al.             | Development and reliability of a Turkish version of the Short Form-Joint Protection Behavior Assessment (JPBA-5)                                                                                                                                              | J Hand Ther                  | 2016 | 29(3)  | 275-280  |
|  | Brigitte M, et al.          | A study compared nine patient-specific indices for musculoskeletal disorders                                                                                                                                                                                  | J Clin Epidemiol             | 2005 | 58(8)  | 791-801  |
|  | Brodin N, et al.            | The McMaster Toronto Arthritis patient preference questionnaire (MACTAR): a methodological study of reliability and minimal detectable change after a 6 week-period of acupuncture treatment in patients with rheumatoid arthritis                            | BMC Res Notes                | 2017 | 10     | 687      |
|  | Muntes LA, et al.           | Disabilities of importance for patients to improve – using a patient preference tool in rheumatoid arthritis                                                                                                                                                  | Disabil Rehabil              | 2014 | 36(21) | 762-1767 |
|  | Verhoeven AC, et al.        | Validity of the MACTAR questionnaire as a functional index in a rheumatoid arthritis clinical trial. The McMaster Toronto Arthritis                                                                                                                           | J Rheumatol                  | 2000 | 27(12) | 801-2809 |
|  | Goodacre L, et al.          | Development and validation of a patient-centred Measure of Activity Limitation (MAL) in rheumatoid arthritis                                                                                                                                                  | Rheumatology                 | 2007 | 46(4)  | 703-708  |
|  | Pausen T, et al.            | Development and Psychometric Testing of the Patient Reported Measure of Activity Performance of the Hand (MAP-HAND) in Rheumatoid Arthritis                                                                                                                   | J Rehabil Med                | 2010 | 42(7)  | 636-644  |
|  | Prior Y, et al.             | Measure of activity performance of the hand (MAP-Hand) questionnaire: linguistic validation, cultural adaptation and psychometric testing in people with rheumatoid arthritis in the UK                                                                       | BMC Musculoskelet Disord     | 2018 | 19(1)  | 275      |
|  | Arkela-Kautiainen M, et al. | Evaluation of the MDHAQ in Finnish patients with RA [corrected]                                                                                                                                                                                               | J Rheumatol                  | 2005 | 32(8)  | 426-1431 |
|  | Josefsson KA, et al.        | Swedish version of the multi dimensional health assessment questionnaire – translation and psychometric evaluation                                                                                                                                            | BMC Musculoskelet Disord     | 2013 | 14     | 178      |
|  | Song Y, et al.              | Multi-dimensional health assessment questionnaire in China: reliability, validity and clinical value in patients with rheumatoid arthritis.                                                                                                                   | PLoS One                     | 2014 | 9(5)   | e97952   |
|  | Yokogawa N, et al.          | Validation of RAPID3 using a Japanese version of Multidimensional Health Assessment Questionnaire with Japanese rheumatoid arthritis patients: characteristics of RAPID3 compared to DAS28 and CDAI                                                           | Mod Rheumatol                | 2015 | 25(2)  | 264-269  |
|  | Arvidson NG, et al.         | Simple function tests, but not the modified HAQ, correlate with radiological joint damage in rheumatoid arthritis                                                                                                                                             | Scand J Rheumatol            | 2002 | 31(3)  | 146-150  |
|  | Benitha R & Tikly M         | Functional disability and health-related quality of life in South Africans with rheumatoid arthritis and systemic lupus erythematosus                                                                                                                         | Clin Rheumatol               | 2007 | 26(1)  | 24-29    |
|  | Escalante A, et al.         | Cross-Cultural Equivalence of a Brief Helplessness Scale for Spanish-Speaking Rheumatology Patients in the United States                                                                                                                                      | Arthritis Care Res           | 1999 | 12(5)  | 341-350  |
|  | Hagen KB, et al.            | The responsiveness of health status measures in patients with rheumatoid arthritis: Comparison of disease-specific and generic instruments                                                                                                                    | J Rheumatol                  | 1999 | 26(7)  | 474-1480 |
|  | Johnson AH, et al.          | The mechanical joint score: a new clinical index of joint damage in rheumatoid arthritis                                                                                                                                                                      | Rheumatology                 | 2002 | 41(2)  | 189-195  |
|  | Kvien TK, et al.            | Performance of health status measures with a pen based personal digital assistant                                                                                                                                                                             | Ann Rheum Dis                | 2005 | 64(10) | 480-1484 |
|  | Martin M, et al.            | Item response theory methods can improve the measurement of physical function by combining the modified health assessment questionnaire and the SF-36 physical function scale                                                                                 | Qual Life Res                | 2007 | 16(4)  | 647-660  |
|  | Russell AS, et al.          | The responsiveness of generic health status measures as assessed in patients with rheumatoid arthritis receiving infliximab                                                                                                                                   | J Rheumatol                  | 2003 | 30(5)  | 941-947  |
|  | Uhlig T, et al.             | Comparison of the Health Assessment Questionnaire (HAQ) and the modified HAQ (MHAQ) in patients with rheumatoid arthritis                                                                                                                                     | Rheumatology                 | 2006 | 45(4)  | 454-458  |
|  | Uhlig T, et al.             | Responsiveness of the International Classification of Functioning, Disability and Health (ICF) Core Set for rheumatoid arthritis                                                                                                                              | Ann Rheum Dis                | 2009 | 68(6)  | 879-884  |
|  | Wolfe F                     | Which HAQ is best? A comparison of the HAQ, MHAQ and RA-HAQ, a difficult 8 item HAQ (DHAQ), and a rescored 20 item HAQ (HAQ20): analyses in 2,491 rheumatoid arthritis patients following leflunomide initiation                                              | J Rheumatol                  | 2001 | 28(5)  | 982-989  |
|  | Hewlett S, et al.           | Measuring the meaning of disability in rheumatoid arthritis: the Personal Impact Health Assessment Questionnaire (PI HAQ)                                                                                                                                     | Ann Rheum Dis                | 2002 | 61(11) | 986-993  |
|  | Shakibi MR, et al.          | Validation of the Personal Impact Health Assessment Questionnaire in Patients with Rheumatoid Arthritis in Kerman, Iran                                                                                                                                       | Turk J Rheumatol             | 2012 | 27(2)  | 121-127  |
|  | Fries JF, et al.            | Improved responsiveness and reduced sample size requirements of PROMIS physical function scales with item response theory                                                                                                                                     | Arthritis Res Ther           | 2011 | 13(5)  | R147     |
|  | Izadi Z, et al.             | Effects of language, insurance and race/ethnicity on measurement properties of the PROMIS Physical Function Short Form 10a in rheumatoid arthritis                                                                                                            | Arthritis Care Res (Hoboken) | 2019 | 71(7)  | 925-935  |
|  | Mahmoud GA, et al.          | Cross cultural adaptation and validation of an Arabic version of selected PROMIS measures for use in rheumatoid arthritis patients                                                                                                                            | The Egyptian Rheumatologist  | 2019 | 41(3)  | 177-182  |
|  | Schaleet B, et al.          | Validity of PROMIS physical function measured in diverse clinical samples                                                                                                                                                                                     | J Clin Epidemiol             | 2016 | 73     | 112-1116 |
|  | Wahl E, et al.              | Validity and Responsiveness of a 10-Item Patient-Reported Measure of Physical Function in a Rheumatoid Arthritis Clinic Population                                                                                                                            | Arthritis Care Res           | 2017 | 69(3)  | 338-346  |
|  | Fries JF, et al.            | Improved responsiveness and reduced sample size requirements of PROMIS physical function scales with item response theory                                                                                                                                     | Arthritis Res Ther           | 2011 | 13(5)  | R147     |
|  | Hays RD, et al.             | Responsiveness and minimally important difference for the Patient-Reported Outcomes Measurement Information System (PROMIS) 20-item physical functioning short form in a prospective observational study of rheumatoid arthritis                              | Ann Rheum Dis                | 2015 | 74(1)  | 104-107  |
|  | Oude Voshaar MA, et al.     | Validity and measurement precision of the PROMIS physical function item bank and a content validity driven 20-item short form in rheumatoid arthritis compared with traditional measures                                                                      | Rheumatology                 | 2015 | 54(12) | 221-229  |
|  | Archenholtz B & Dellhag B   | Validity and reliability of the instrument Performance and Satisfaction in Activities of Daily Living (PS-ADL) and its clinical applicability to adults with rheumatoid arthritis                                                                             | Scand J Occup Ther           | 2008 | 15(1)  | 13-22    |
|  | Hammond A, et al.           | Linguistic validation, validity and reliability of the British English versions of the Disabilities of the Arm, Shoulder and Hand (DASH) questionnaire and QuickDASH in people with rheumatoid arthritis                                                      | BMC Musculoskelet Disord     | 2018 | 19     | 118      |
|  | Prodinge B, et al.          | Revisiting the disabilities of the arm, shoulder and hand (DASH) and QuickDASH in rheumatoid arthritis                                                                                                                                                        | BMC Musculoskelet Disord     | 2019 | 20     | 41       |
|  | Guermazi M, et al.          | Development and validation of an Arabic rheumatoid hand disability scale                                                                                                                                                                                      | Disabil Rehabil              | 2004 | 26(11) | 655-661  |
|  | Wikström J, et al.          | Reliability, validity and responsiveness of a new leisure index: The Patient-Specific Leisure Scale (PSLS)                                                                                                                                                    | Musculoskeletal Care         | 2009 | 7(3)   | 178-193  |
|  | Salaffi F, et al.           | The Patient-Reported Outcomes Thermometer-5-Item Scale (ST-PRO5): Validation of a New Tool for the Quick Assessment of Overall Health Status in Painful Rheumatic Diseases                                                                                    | Pain Res Manag               | 2018 | 2018   | 3496846  |
|  | Chiou CF, et al.            | Development and Validation of Cedars-Sinai Health-Related Quality of Life in Rheumatoid Arthritis (CSHQ-RA) Short Form Instrument                                                                                                                             | Arthritis Rheum              | 2004 | 51(3)  | 358-364  |
|  | Chiou CF, et al.            | Revalidation of the Original Cedars-Sinai Health-Related Quality of Life in Rheumatoid Arthritis Questionnaire                                                                                                                                                | J Rheumatol                  | 2006 | 33(2)  | 256-262  |
|  | Barroso N, et al.           | The American English version of the validated French Flare Assessment in RA Questionnaire (FLARE-RA)                                                                                                                                                          | Clin Rheumatol               | 2020 | 39(1)  | 189-199  |
|  | Berthelot JM, et al.        | A tool to identify recent or present rheumatoid arthritis flare from both patient and physician perspectives: The 'FLARE' instrument                                                                                                                          | Ann Rheum Dis                | 2012 | 71(7)  | 110-1116 |
|  | de Thurah A, et al.         | Patient self-assessment of flare in rheumatoid arthritis: criterion and concurrent validity of the Flare instrument                                                                                                                                           | Clin Rheumatol               | 2016 | 35(2)  | 467-471  |
|  | Fautrel B, et al.           | Validation of FLARE-RA, a Self-Administered Tool to Detect Recent or Current Rheumatoid Arthritis Flare                                                                                                                                                       | Arthritis Rheumatol          | 2017 | 69(2)  | 309-319  |
|  | Maribo T, et al.            | Patient-self assessment of flare in rheumatoid arthritis: translation and reliability of the Flare instrument                                                                                                                                                 | Clin Rheumatol               | 2016 | 35(4)  | 053-1058 |
|  | Myasoedova, E               | Definition and construct validation of clinically relevant cutoffs on the Flare Assessment in Rheumatoid Arthritis (FLARE-RA) questionnaire                                                                                                                   | Semin Arthritis Rheum        | 2020 | 50     | 261-265  |
|  | Sautner J, et al.           | Development of the M-SACRAH, a modified shortened version of SACRAH (Score for assessment and Quantification of Chronic Rheumatoid Affections of the Hands)                                                                                                   | Rheumatology                 | 2004 | 43(11) | 409-1413 |
|  | Singh H, et al.             | Assessment of hand functions in rheumatoid arthritis using SF-SACRAH (short form score for the assessment and quantification of chronic rheumatoid affections of the hands) and its correlation to disease activity                                           | Rheumatol Int                | 2012 | 32(11) | 413-4319 |
|  | Norton S, et al.            | Validation of the Musculoskeletal Health Questionnaire in Inflammatory Arthritis: A Psychometric Evaluation                                                                                                                                                   | Rheumatology (Oxford)        | 2019 | 58(1)  | 45-51    |
|  | Bartlett SJ, et al.         | Content and Construct Validity, Reliability, and Responsiveness of the Rheumatoid Arthritis Flare Questionnaire: OMERACT 2016 Workshop Report                                                                                                                 | J Rheumatol                  | 2017 | 44(10) | 536-1543 |
|  | Dougados M, et al.          | Defining cut-off values for disease activity states and improvement scores for patient-reported outcomes: the example of the Rheumatoid Arthritis Impact of Disease (RAID)                                                                                    | Arthritis Res Ther           | 2012 | 14(3)  | R129     |
|  | Fautrel B, et al.           | Validation of FLARE-RA, a Self-Administered Tool to Detect Recent or Current Rheumatoid Arthritis Flare                                                                                                                                                       | Arthritis Rheum              | 2017 | 69(2)  | 309-319  |
|  | Ferreira RD, et al.         | The Portuguese Rheumatoid Arthritis Impact of Disease (RAID) score and its measurement equivalence in three countries: validation study using Rasch Models                                                                                                    | Qual Life Res                | 2018 | 27(11) | 909-2921 |
|  | Gossec L, et al.            | Elaboration of the preliminary Rheumatoid Arthritis Impact of Disease (RAID) score: a EULAR initiative                                                                                                                                                        | Ann Rheum Dis                | 2009 | 68(11) | 680-1685 |
|  | Gossec L, et al.            | Finalisation and validation of the rheumatoid arthritis impact of disease score, a patient-derived composite measure of impact of rheumatoid arthritis: EULAR initiative                                                                                      | Ann Rheum Dis                | 2011 | 70(6)  | 935-942  |
|  | Heilberg T, et al.          | Performance of the Rheumatoid Arthritis Impact of Disease (RAID) score in relation to other patient-reported outcomes in a register of patients with rheumatoid arthritis                                                                                     | Ann Rheum Dis                | 2011 | 70(6)  | 980-1082 |
|  | Hewlett S, et al.           | The revised Bristol Rheumatoid Arthritis Fatigue measures and the Rheumatoid Arthritis Impact of Disease scale: validation in six countries                                                                                                                   | Rheumatology                 | 2018 | 57(2)  | 300-308  |
|  | Holten K, et al.            | Comparative analyses of responsiveness between the Rheumatoid Arthritis Impact of Disease score, other patient-reported outcomes and disease activity measures: secondary analyses from the ARCTIC study                                                      | RMD Open                     | 2018 | 4(2)   | e000754  |
|  | Oude Voshaar MAH, et al.    | Psychometric properties and cross-language equivalence of the revised Bristol Rheumatoid Arthritis Fatigue and the Rheumatoid Arthritis Impact of Disease scales in rheumatoid arthritis                                                                      | Quality of Life Research     | 2019 | 28(9)  | 543-2522 |
|  | Salaffi F, et al.           | Validity of the rheumatoid arthritis impact of disease (RAID) score and definition of cut-off points for disease activity states in a population-based European cohort of patients with rheumatoid arthritis                                                  | Joint Bone Spine             | 2018 | 85(3)  | 317-322  |
|  | ter Wee MM, et al.          | Content validity of the Dutch Rheumatoid Arthritis Impact of Disease (RAID) score: results of focus group discussions in established rheumatoid arthritis patients and comparison with the International Classification of Functioning, Disability and Health | Arthritis Res Ther           | 2016 | 18     | 22       |

|     |                   |                                                                                                                                                                                                                                                                                                                                       |                                                                                                                                                                                                                                                                                                                                                                                                                                                                                                                                                                                                                                                                                                                                                                                                                                                                                                                                                                                                                                                                                                                                                                                                                                                                                                                                                                                                                                                                                                                                                                                                                                                                                                                                                                                                                                                                                                                                                                                                                                                                                                                                                                                                                                                                                                                                                                                                                                                                                                                                                                                                                                                                                                                                                                                                                                                                                                                                                                                                                                                                                                                                                                                                                                                                                                                                                                                                                                                                                                                                                                                                                                                                                                                                                                                                                                                                                                                                                                                                                                                                                                                                                                                                                                                                                                                                                                                                                                                                                                                                                                                                                                                                                      |                                                                                                                                                                                                                                                                                                                                                                                                                                                                                                                                                                                                                                                                                                                                                                                                                                                                                                                                                                                                                                                                                                                                                                                                                                                                                                                                                                                                                                                                                                                                                                                                    |                                                                                                                                                                                                                                                                                                                                                                                                                                                                                                                                                                                                                                                                                                                              |                                                                                                                                                                                                                                                                                                                                                                                                                                                                                                                                                                                                                                                                                                                                                                                                                                                                                                                                                                                                                                                                                                                                                                                                                                                                                                                   |
|-----|-------------------|---------------------------------------------------------------------------------------------------------------------------------------------------------------------------------------------------------------------------------------------------------------------------------------------------------------------------------------|--------------------------------------------------------------------------------------------------------------------------------------------------------------------------------------------------------------------------------------------------------------------------------------------------------------------------------------------------------------------------------------------------------------------------------------------------------------------------------------------------------------------------------------------------------------------------------------------------------------------------------------------------------------------------------------------------------------------------------------------------------------------------------------------------------------------------------------------------------------------------------------------------------------------------------------------------------------------------------------------------------------------------------------------------------------------------------------------------------------------------------------------------------------------------------------------------------------------------------------------------------------------------------------------------------------------------------------------------------------------------------------------------------------------------------------------------------------------------------------------------------------------------------------------------------------------------------------------------------------------------------------------------------------------------------------------------------------------------------------------------------------------------------------------------------------------------------------------------------------------------------------------------------------------------------------------------------------------------------------------------------------------------------------------------------------------------------------------------------------------------------------------------------------------------------------------------------------------------------------------------------------------------------------------------------------------------------------------------------------------------------------------------------------------------------------------------------------------------------------------------------------------------------------------------------------------------------------------------------------------------------------------------------------------------------------------------------------------------------------------------------------------------------------------------------------------------------------------------------------------------------------------------------------------------------------------------------------------------------------------------------------------------------------------------------------------------------------------------------------------------------------------------------------------------------------------------------------------------------------------------------------------------------------------------------------------------------------------------------------------------------------------------------------------------------------------------------------------------------------------------------------------------------------------------------------------------------------------------------------------------------------------------------------------------------------------------------------------------------------------------------------------------------------------------------------------------------------------------------------------------------------------------------------------------------------------------------------------------------------------------------------------------------------------------------------------------------------------------------------------------------------------------------------------------------------------------------------------------------------------------------------------------------------------------------------------------------------------------------------------------------------------------------------------------------------------------------------------------------------------------------------------------------------------------------------------------------------------------------------------------------------------------------------------------------------|----------------------------------------------------------------------------------------------------------------------------------------------------------------------------------------------------------------------------------------------------------------------------------------------------------------------------------------------------------------------------------------------------------------------------------------------------------------------------------------------------------------------------------------------------------------------------------------------------------------------------------------------------------------------------------------------------------------------------------------------------------------------------------------------------------------------------------------------------------------------------------------------------------------------------------------------------------------------------------------------------------------------------------------------------------------------------------------------------------------------------------------------------------------------------------------------------------------------------------------------------------------------------------------------------------------------------------------------------------------------------------------------------------------------------------------------------------------------------------------------------------------------------------------------------------------------------------------------------|------------------------------------------------------------------------------------------------------------------------------------------------------------------------------------------------------------------------------------------------------------------------------------------------------------------------------------------------------------------------------------------------------------------------------------------------------------------------------------------------------------------------------------------------------------------------------------------------------------------------------------------------------------------------------------------------------------------------------|-------------------------------------------------------------------------------------------------------------------------------------------------------------------------------------------------------------------------------------------------------------------------------------------------------------------------------------------------------------------------------------------------------------------------------------------------------------------------------------------------------------------------------------------------------------------------------------------------------------------------------------------------------------------------------------------------------------------------------------------------------------------------------------------------------------------------------------------------------------------------------------------------------------------------------------------------------------------------------------------------------------------------------------------------------------------------------------------------------------------------------------------------------------------------------------------------------------------------------------------------------------------------------------------------------------------|
| 93  | RAPID3            | Boone NW, et al.<br>Bossert M, et al.<br>Horta-Baas G, et al.<br>Leeb BF, et al.<br>Pincus T, et al.<br>Salaffi J, et al.<br>Uhlrig T, et al.<br>Yokogawa N, et al.                                                                                                                                                                   | Routine Assessment of Patient Index Data 3 (RAPID3) alone is insufficient to monitor disease activity in rheumatoid arthritis in clinical practice<br>Evaluation of self-report questionnaires for assessing rheumatoid arthritis activity: a cross-sectional study of RAPID3 and RADAIS and flare detection in 200 patients<br>Evaluation of the activity of rheumatoid arthritis in clinical practice. Agreement between self-rated clinimetric evaluation and clinical evaluation with activity indexes: DAS28, CDAI and SDAI<br>A comparison of patient questionnaires and composite indexes in routine care of rheumatoid arthritis patients<br>RAPID3, an index to assess and monitor patients with rheumatoid arthritis, without formal joint counts: similar results to DAS28 and CDAI in clinical trials and clinical care<br>New indices study group. The comparative responsiveness of the patient self-report questionnaires and composite disease indices for assessing rheumatoid arthritis activity in routine care<br>Test-retest reliability of disease activity core set measures and indices in rheumatoid arthritis<br>Validation of RAPID3 using a Japanese version of Multidimensional Health Assessment Questionnaire with Japanese rheumatoid arthritis patients: characteristics of RAPID3 compared to DAS28 and CDAI<br>A tool for the assessment of hand involvement in rheumatic disorders in daily routine of the SF-SACRAH (short form score for the assessment and quantification of chronic rheumatic affections of the hands)<br>The Short Form Score for the Assessment and Quantification of Chronic Rheumatic Affections of the Hands in Daily Clinical Routines—Its Sensitivity to Change and Preliminary Patient Relevant Variation Values: A Pilot Study<br>Reliability, validity and responsiveness of the German Short Musculoskeletal Function Assessment Questionnaire in patients undergoing surgical or conservative inpatient treatment<br>Development and Validation of a Short Form of the Valued Life Activities Disability Questionnaire for Rheumatoid Arthritis<br>Validation and internal consistency of the Swedish version of the Valued Life Activities scale<br>Measuring patients' experiences with rheumatic care: the consumer quality index rheumatoid arthritis.<br>Internalised stigma in people with rheumatoid arthritis: a cross sectional study to establish the psychometric properties of the ISMI-RA<br>Measuring person-centred care in nurse-led outpatient rheumatology clinics<br>Person-centred care in nurse-led outpatient rheumatology clinics: Conceptualization and initial development of a measurement instrument.<br>Development of a quality of patient-health care provider communication scale from the perspective of patients with rheumatoid arthritis<br>Discriminant and convergent validity of self-report measures of affective distress in patients with RA<br>Learned Helplessness and Its Correlation to Impairment, Pain, Anxiety and Depression in Rheumatoid Arthritis<br>The measurement of helplessness in rheumatoid arthritis. The development of the arthritis helplessness index<br>Factor structure of the Arthritis Helplessness Index<br>Self-efficacy in Rheumatoid Arthritis: Translation and Test of Validity, Reliability and Sensitivity of the Danish Version of the Rheumatoid Arthritis Self-Efficacy Questionnaire (RASE)<br>Psychometric properties of the Chinese version of Arthritis Self-Efficacy Scale-8 (ASES-8) in a rheumatoid arthritis population<br>Translation to Brazilian Portuguese, cultural adaptation and psychometric properties of 8-item Arthritis Self-Efficacy Scale (ASES-8)<br>The Development and Psychometric Evaluation of the Brief Resilient Coping Scale<br>The Swedish Exercise Self-Efficacy Scale (ESES-5): reliability and validity in a rheumatoid arthritis population<br>Development and psychometric properties of a joint protection self-efficacy scale<br>Validation of the Chinese version of joint protection self-efficacy scale in patients with rheumatoid arthritis<br>Psychometric Validation of an Empowerment Scale for Spanish-speaking Patients With Rheumatoid Arthritis<br>Further analysis of learned helplessness in rheumatoid arthritis using a "Rheumatology Attitudes Index"<br>Measures of self-efficacy: Arthritis Self-Efficacy Scale (ASES), Arthritis Self-Efficacy Scale-8 Item (ASES-8), Children's Arthritis Self-Efficacy Scale (CASE), Chronic Disease Self-Efficacy Scale (CDSES), Parent's Arthritis Self-Efficacy Scale (PASE), and Rheumatoid Arthritis Self-Efficacy Scale (RASES) | RMD Open<br>Joint Bone Spine<br>Med Clin (Barc)<br>Joint Bone Spine<br>Rheum Dis Clin North Am<br>Clin Exp Rheumatol<br>Ann Rheum Dis<br>Mod Rheumatol<br>Osteoarthritis Cartilage<br>Front Med (Lausanne)<br>Qual Life Res<br>Arthritis Care Res<br>Clin Rehabil<br>Rheumatol Int<br>BMC Musculoskelet Disord<br>Musculoskeletal Care<br>Musculoskeletal Care<br>Chronic Illn<br>J Rheumatol<br>Scand J Rheumatol<br>J Rheumatol<br>J Rheumatol<br>Musculoskelet Care<br>Rheumatol Int<br>Sao Paulo Med J<br>Assessment<br>Disabil Rehabil<br>Scand J Occup Ther<br>Clin Rheumatol<br>Arthritis Res Ther<br>J Rheumatol<br>Arthritis Care Res<br>Rheumatology<br>Rheumatology<br>Musculoskelet Care<br>Musculoskelet Care<br>PLOS One<br>BMC Rheumatol<br>Health Qual Life Outcomes<br>Pain<br>Ann Behav Med<br>Acta Reumatol Port<br>Arthritis Res Ther<br>BMC Musculoskelet Disord<br>Qual Life Res<br>Joint Bone Spine<br>Patient Educ Couns<br>Int J Rheum Dis<br>Arthritis Care Res (Hoboken)<br>Arthritis Care Res<br>Adv Med Sci<br>Br J Rheumatol<br>Acta Reumatol Port<br>Rheumatology<br>Rheumatology<br>Curr Rheumatol Rev<br>Scand J Rheumatol<br>J Rheumatol<br>Acta Med Port<br>Clin Exp Rheumatol<br>Rheumatology<br>Clin Rheumatol<br>Br J Rheumatol<br>Rheumatol Int<br>Rheumatol Int<br>Pharmacoeconomics<br>Arthritis Rheum<br>Health Econ<br>Arthritis Care Res<br>Med Care<br>Health Qual Life Outcomes<br>Acta Med Port<br>J Rheumatol<br>J Back Musculoskelet Rehabil<br>Health Qual Life Outcomes<br>Qual Life Res<br>Int J Rheum Dis<br>Br J Rheumatol<br>Br J Rheumatol | 2019<br>2012<br>2017<br>2009<br>2009<br>2012<br>2009<br>2015<br>2009<br>2017<br>2006<br>2011<br>2016<br>2009<br>2016<br>2018<br>2018<br>2013<br>1989<br>1994<br>1985<br>1988<br>2010<br>2017<br>2019<br>2004<br>2015<br>2011<br>2019<br>1988<br>2011<br>2014<br>2001<br>2008<br>2010<br>2019<br>2011<br>1987<br>1997<br>2015<br>2013<br>2010<br>2017<br>2019<br>2015<br>2017<br>2011<br>2015<br>2009<br>2019<br>2019<br>2012<br>2019<br>2009<br>2017<br>2006<br>2017<br>2008<br>2016<br>2004<br>2001<br>2012<br>1997<br>2019<br>2006<br>2017<br>2006<br>2016<br>2008<br>2012<br>1997<br>2015<br>2017<br>2010<br>2006<br>2008<br>2012<br>2003<br>2017<br>2014<br>2011<br>2015<br>2010<br>2009<br>2017<br>2017<br>2017<br>1994 | 5(2) e001050<br>79(1) 57-62<br>149(7) 293-299<br>76(6) 658-64<br>35(4) 773-778<br>30(6) 912-921<br>68(6) 972-975<br>25(2) 264-269<br>17(1) 59-63<br>4 6<br>15(7) 233-1241<br>63(12) 664-1671<br>30(12) 211-1219<br>30(2) 159-167<br>17 244<br>16(2) 296-304<br>16(2) 287-295<br>9(2) 103-115<br>16(11) 1428-32<br>23(6) 299-304<br>12(3) 462-467<br>15(3) 427-432<br>8(3) 123-135<br>3(5) 751-756<br>13(1) 6-12<br>11(1) 94-101<br>37(2) 130-214<br>18(2) 143-152<br>38(8) 119-2127<br>20(1) 244<br>15(3) 418-426<br>63(11) 473-5485<br>30(7) 161-171<br>40(11) 221-1230<br>6(1) 49-67<br>8(3) 123-135<br>14(7) 0219921<br>3 4<br>9 2<br>31(1) 53-64<br>19(1) 11-21<br>40(3) 242-253<br>15(5) 8156<br>12 110<br>24(3) 721-733<br>84(6) 693-698<br>77(1) 136-143<br>22(11) 031-2044<br>71(4) 521-529<br>45(2) 167-173<br>54(1) 27-31<br>36(8) 878-883<br>44(1) 65-70<br>45(1) 61-65<br>45(1) 66-71<br>13(3) 197-205<br>35(2) 117-123<br>35(8) 528-1537<br>60(7) 571-1542<br>22(1) 25-33<br>40(10) 112-119<br>31(7) 965-1071<br>36(8) 884-888<br>35(4) 669-675<br>37(4) 641-646<br>28(6) 477-487<br>55(5) 751-756<br>17(7) 815-832<br>64(6) 826-832<br>41(7) 791-801<br>15(1) 20<br>27(2) 236-245<br>38(9) 576-1584<br>28(2) 401-408<br>8 21<br>18(9) 195-1205<br>20(12) 987-1992<br>36(5) 551-559<br>33(7) 655-662 |
| 94  | SF-SACRAH         | Rintelen B, et al.<br>Stummer U, et al.<br>Wollmerstedt N, et al.                                                                                                                                                                                                                                                                     | A tool for the assessment of hand involvement in rheumatic disorders in daily routine of the SF-SACRAH (short form score for the assessment and quantification of chronic rheumatic affections of the hands)<br>The Short Form Score for the Assessment and Quantification of Chronic Rheumatic Affections of the Hands in Daily Clinical Routines—Its Sensitivity to Change and Preliminary Patient Relevant Variation Values: A Pilot Study                                                                                                                                                                                                                                                                                                                                                                                                                                                                                                                                                                                                                                                                                                                                                                                                                                                                                                                                                                                                                                                                                                                                                                                                                                                                                                                                                                                                                                                                                                                                                                                                                                                                                                                                                                                                                                                                                                                                                                                                                                                                                                                                                                                                                                                                                                                                                                                                                                                                                                                                                                                                                                                                                                                                                                                                                                                                                                                                                                                                                                                                                                                                                                                                                                                                                                                                                                                                                                                                                                                                                                                                                                                                                                                                                                                                                                                                                                                                                                                                                                                                                                                                                                                                                                        | 2009<br>2017<br>2006                                                                                                                                                                                                                                                                                                                                                                                                                                                                                                                                                                                                                                                                                                                                                                                                                                                                                                                                                                                                                                                                                                                                                                                                                                                                                                                                                                                                                                                                                                                                                                               | 17(1) 59-63<br>4 6<br>15(7) 233-1241                                                                                                                                                                                                                                                                                                                                                                                                                                                                                                                                                                                                                                                                                         |                                                                                                                                                                                                                                                                                                                                                                                                                                                                                                                                                                                                                                                                                                                                                                                                                                                                                                                                                                                                                                                                                                                                                                                                                                                                                                                   |
| 95  | SMFA              | Stummer U, et al.                                                                                                                                                                                                                                                                                                                     | Reliability, validity and responsiveness of the German Short Musculoskeletal Function Assessment Questionnaire in patients undergoing surgical or conservative inpatient treatment                                                                                                                                                                                                                                                                                                                                                                                                                                                                                                                                                                                                                                                                                                                                                                                                                                                                                                                                                                                                                                                                                                                                                                                                                                                                                                                                                                                                                                                                                                                                                                                                                                                                                                                                                                                                                                                                                                                                                                                                                                                                                                                                                                                                                                                                                                                                                                                                                                                                                                                                                                                                                                                                                                                                                                                                                                                                                                                                                                                                                                                                                                                                                                                                                                                                                                                                                                                                                                                                                                                                                                                                                                                                                                                                                                                                                                                                                                                                                                                                                                                                                                                                                                                                                                                                                                                                                                                                                                                                                                   | 2006                                                                                                                                                                                                                                                                                                                                                                                                                                                                                                                                                                                                                                                                                                                                                                                                                                                                                                                                                                                                                                                                                                                                                                                                                                                                                                                                                                                                                                                                                                                                                                                               | 15(7) 233-1241                                                                                                                                                                                                                                                                                                                                                                                                                                                                                                                                                                                                                                                                                                               |                                                                                                                                                                                                                                                                                                                                                                                                                                                                                                                                                                                                                                                                                                                                                                                                                                                                                                                                                                                                                                                                                                                                                                                                                                                                                                                   |
| 96  | S-VLA             | Katz PP, et al.                                                                                                                                                                                                                                                                                                                       | Development and Validation of a Short Form of the Valued Life Activities Disability Questionnaire for Rheumatoid Arthritis                                                                                                                                                                                                                                                                                                                                                                                                                                                                                                                                                                                                                                                                                                                                                                                                                                                                                                                                                                                                                                                                                                                                                                                                                                                                                                                                                                                                                                                                                                                                                                                                                                                                                                                                                                                                                                                                                                                                                                                                                                                                                                                                                                                                                                                                                                                                                                                                                                                                                                                                                                                                                                                                                                                                                                                                                                                                                                                                                                                                                                                                                                                                                                                                                                                                                                                                                                                                                                                                                                                                                                                                                                                                                                                                                                                                                                                                                                                                                                                                                                                                                                                                                                                                                                                                                                                                                                                                                                                                                                                                                           | 2011                                                                                                                                                                                                                                                                                                                                                                                                                                                                                                                                                                                                                                                                                                                                                                                                                                                                                                                                                                                                                                                                                                                                                                                                                                                                                                                                                                                                                                                                                                                                                                                               | 63(12) 664-1671                                                                                                                                                                                                                                                                                                                                                                                                                                                                                                                                                                                                                                                                                                              |                                                                                                                                                                                                                                                                                                                                                                                                                                                                                                                                                                                                                                                                                                                                                                                                                                                                                                                                                                                                                                                                                                                                                                                                                                                                                                                   |
| 97  | VLA               | Björk M, et al.                                                                                                                                                                                                                                                                                                                       | Validation and internal consistency of the Swedish version of the Valued Life Activities scale                                                                                                                                                                                                                                                                                                                                                                                                                                                                                                                                                                                                                                                                                                                                                                                                                                                                                                                                                                                                                                                                                                                                                                                                                                                                                                                                                                                                                                                                                                                                                                                                                                                                                                                                                                                                                                                                                                                                                                                                                                                                                                                                                                                                                                                                                                                                                                                                                                                                                                                                                                                                                                                                                                                                                                                                                                                                                                                                                                                                                                                                                                                                                                                                                                                                                                                                                                                                                                                                                                                                                                                                                                                                                                                                                                                                                                                                                                                                                                                                                                                                                                                                                                                                                                                                                                                                                                                                                                                                                                                                                                                       | 2016                                                                                                                                                                                                                                                                                                                                                                                                                                                                                                                                                                                                                                                                                                                                                                                                                                                                                                                                                                                                                                                                                                                                                                                                                                                                                                                                                                                                                                                                                                                                                                                               | 30(12) 211-1219                                                                                                                                                                                                                                                                                                                                                                                                                                                                                                                                                                                                                                                                                                              |                                                                                                                                                                                                                                                                                                                                                                                                                                                                                                                                                                                                                                                                                                                                                                                                                                                                                                                                                                                                                                                                                                                                                                                                                                                                                                                   |
| 98  | CQ-Index RA       | Zuidgeest M, et al.                                                                                                                                                                                                                                                                                                                   | Measuring patients' experiences with rheumatic care: the consumer quality index rheumatoid arthritis.                                                                                                                                                                                                                                                                                                                                                                                                                                                                                                                                                                                                                                                                                                                                                                                                                                                                                                                                                                                                                                                                                                                                                                                                                                                                                                                                                                                                                                                                                                                                                                                                                                                                                                                                                                                                                                                                                                                                                                                                                                                                                                                                                                                                                                                                                                                                                                                                                                                                                                                                                                                                                                                                                                                                                                                                                                                                                                                                                                                                                                                                                                                                                                                                                                                                                                                                                                                                                                                                                                                                                                                                                                                                                                                                                                                                                                                                                                                                                                                                                                                                                                                                                                                                                                                                                                                                                                                                                                                                                                                                                                                | 2009                                                                                                                                                                                                                                                                                                                                                                                                                                                                                                                                                                                                                                                                                                                                                                                                                                                                                                                                                                                                                                                                                                                                                                                                                                                                                                                                                                                                                                                                                                                                                                                               | 30(2) 159-167                                                                                                                                                                                                                                                                                                                                                                                                                                                                                                                                                                                                                                                                                                                |                                                                                                                                                                                                                                                                                                                                                                                                                                                                                                                                                                                                                                                                                                                                                                                                                                                                                                                                                                                                                                                                                                                                                                                                                                                                                                                   |
| 99  | ISMI-RA           | Corker E, et al.                                                                                                                                                                                                                                                                                                                      | Internalised stigma in people with rheumatoid arthritis: a cross sectional study to establish the psychometric properties of the ISMI-RA                                                                                                                                                                                                                                                                                                                                                                                                                                                                                                                                                                                                                                                                                                                                                                                                                                                                                                                                                                                                                                                                                                                                                                                                                                                                                                                                                                                                                                                                                                                                                                                                                                                                                                                                                                                                                                                                                                                                                                                                                                                                                                                                                                                                                                                                                                                                                                                                                                                                                                                                                                                                                                                                                                                                                                                                                                                                                                                                                                                                                                                                                                                                                                                                                                                                                                                                                                                                                                                                                                                                                                                                                                                                                                                                                                                                                                                                                                                                                                                                                                                                                                                                                                                                                                                                                                                                                                                                                                                                                                                                             | 2016                                                                                                                                                                                                                                                                                                                                                                                                                                                                                                                                                                                                                                                                                                                                                                                                                                                                                                                                                                                                                                                                                                                                                                                                                                                                                                                                                                                                                                                                                                                                                                                               | 17 244                                                                                                                                                                                                                                                                                                                                                                                                                                                                                                                                                                                                                                                                                                                       |                                                                                                                                                                                                                                                                                                                                                                                                                                                                                                                                                                                                                                                                                                                                                                                                                                                                                                                                                                                                                                                                                                                                                                                                                                                                                                                   |
| 100 | PCCoc/rheum       | Bala SV, et al.<br>Bala SV, et al.                                                                                                                                                                                                                                                                                                    | Measuring person-centred care in nurse-led outpatient rheumatology clinics<br>Person-centred care in nurse-led outpatient rheumatology clinics: Conceptualization and initial development of a measurement instrument.                                                                                                                                                                                                                                                                                                                                                                                                                                                                                                                                                                                                                                                                                                                                                                                                                                                                                                                                                                                                                                                                                                                                                                                                                                                                                                                                                                                                                                                                                                                                                                                                                                                                                                                                                                                                                                                                                                                                                                                                                                                                                                                                                                                                                                                                                                                                                                                                                                                                                                                                                                                                                                                                                                                                                                                                                                                                                                                                                                                                                                                                                                                                                                                                                                                                                                                                                                                                                                                                                                                                                                                                                                                                                                                                                                                                                                                                                                                                                                                                                                                                                                                                                                                                                                                                                                                                                                                                                                                               | 2018<br>2018                                                                                                                                                                                                                                                                                                                                                                                                                                                                                                                                                                                                                                                                                                                                                                                                                                                                                                                                                                                                                                                                                                                                                                                                                                                                                                                                                                                                                                                                                                                                                                                       | 16(2) 296-304<br>16(2) 287-295                                                                                                                                                                                                                                                                                                                                                                                                                                                                                                                                                                                                                                                                                               |                                                                                                                                                                                                                                                                                                                                                                                                                                                                                                                                                                                                                                                                                                                                                                                                                                                                                                                                                                                                                                                                                                                                                                                                                                                                                                                   |
| 101 | PHPCPS            | Salt E, et al.                                                                                                                                                                                                                                                                                                                        | Development of a quality of patient-health care provider communication scale from the perspective of patients with rheumatoid arthritis                                                                                                                                                                                                                                                                                                                                                                                                                                                                                                                                                                                                                                                                                                                                                                                                                                                                                                                                                                                                                                                                                                                                                                                                                                                                                                                                                                                                                                                                                                                                                                                                                                                                                                                                                                                                                                                                                                                                                                                                                                                                                                                                                                                                                                                                                                                                                                                                                                                                                                                                                                                                                                                                                                                                                                                                                                                                                                                                                                                                                                                                                                                                                                                                                                                                                                                                                                                                                                                                                                                                                                                                                                                                                                                                                                                                                                                                                                                                                                                                                                                                                                                                                                                                                                                                                                                                                                                                                                                                                                                                              | 2013                                                                                                                                                                                                                                                                                                                                                                                                                                                                                                                                                                                                                                                                                                                                                                                                                                                                                                                                                                                                                                                                                                                                                                                                                                                                                                                                                                                                                                                                                                                                                                                               | 9(2) 103-115                                                                                                                                                                                                                                                                                                                                                                                                                                                                                                                                                                                                                                                                                                                 |                                                                                                                                                                                                                                                                                                                                                                                                                                                                                                                                                                                                                                                                                                                                                                                                                                                                                                                                                                                                                                                                                                                                                                                                                                                                                                                   |
| 102 | AH                | Hagglund Hii, et al.<br>Lindroth Y, et al.<br>Nicasso PM, et al.<br>Stein MJ, et al.                                                                                                                                                                                                                                                  | Discriminant and convergent validity of self-report measures of affective distress in patients with RA<br>Learned Helplessness and Its Correlation to Impairment, Pain, Anxiety and Depression in Rheumatoid Arthritis<br>The measurement of helplessness in rheumatoid arthritis. The development of the arthritis helplessness index<br>Factor structure of the Arthritis Helplessness Index                                                                                                                                                                                                                                                                                                                                                                                                                                                                                                                                                                                                                                                                                                                                                                                                                                                                                                                                                                                                                                                                                                                                                                                                                                                                                                                                                                                                                                                                                                                                                                                                                                                                                                                                                                                                                                                                                                                                                                                                                                                                                                                                                                                                                                                                                                                                                                                                                                                                                                                                                                                                                                                                                                                                                                                                                                                                                                                                                                                                                                                                                                                                                                                                                                                                                                                                                                                                                                                                                                                                                                                                                                                                                                                                                                                                                                                                                                                                                                                                                                                                                                                                                                                                                                                                                       | 1989<br>1994<br>1985<br>1988                                                                                                                                                                                                                                                                                                                                                                                                                                                                                                                                                                                                                                                                                                                                                                                                                                                                                                                                                                                                                                                                                                                                                                                                                                                                                                                                                                                                                                                                                                                                                                       | 16(11) 1428-32<br>23(6) 299-304<br>12(3) 462-467<br>15(3) 427-432                                                                                                                                                                                                                                                                                                                                                                                                                                                                                                                                                                                                                                                            |                                                                                                                                                                                                                                                                                                                                                                                                                                                                                                                                                                                                                                                                                                                                                                                                                                                                                                                                                                                                                                                                                                                                                                                                                                                                                                                   |
| 103 | ASES              | Primdahl J, et al.                                                                                                                                                                                                                                                                                                                    | Self-efficacy in Rheumatoid Arthritis: Translation and Test of Validity, Reliability and Sensitivity of the Danish Version of the Rheumatoid Arthritis Self-Efficacy Questionnaire (RASE)                                                                                                                                                                                                                                                                                                                                                                                                                                                                                                                                                                                                                                                                                                                                                                                                                                                                                                                                                                                                                                                                                                                                                                                                                                                                                                                                                                                                                                                                                                                                                                                                                                                                                                                                                                                                                                                                                                                                                                                                                                                                                                                                                                                                                                                                                                                                                                                                                                                                                                                                                                                                                                                                                                                                                                                                                                                                                                                                                                                                                                                                                                                                                                                                                                                                                                                                                                                                                                                                                                                                                                                                                                                                                                                                                                                                                                                                                                                                                                                                                                                                                                                                                                                                                                                                                                                                                                                                                                                                                            | 2010                                                                                                                                                                                                                                                                                                                                                                                                                                                                                                                                                                                                                                                                                                                                                                                                                                                                                                                                                                                                                                                                                                                                                                                                                                                                                                                                                                                                                                                                                                                                                                                               | 8(3) 123-135                                                                                                                                                                                                                                                                                                                                                                                                                                                                                                                                                                                                                                                                                                                 |                                                                                                                                                                                                                                                                                                                                                                                                                                                                                                                                                                                                                                                                                                                                                                                                                                                                                                                                                                                                                                                                                                                                                                                                                                                                                                                   |
| 104 | ASES-8            | Gao L, et al.<br>Silva RVT, et al.                                                                                                                                                                                                                                                                                                    | Psychometric properties of the Chinese version of Arthritis Self-Efficacy Scale-8 (ASES-8) in a rheumatoid arthritis population<br>Translation to Brazilian Portuguese, cultural adaptation and psychometric properties of 8-item Arthritis Self-Efficacy Scale (ASES-8)                                                                                                                                                                                                                                                                                                                                                                                                                                                                                                                                                                                                                                                                                                                                                                                                                                                                                                                                                                                                                                                                                                                                                                                                                                                                                                                                                                                                                                                                                                                                                                                                                                                                                                                                                                                                                                                                                                                                                                                                                                                                                                                                                                                                                                                                                                                                                                                                                                                                                                                                                                                                                                                                                                                                                                                                                                                                                                                                                                                                                                                                                                                                                                                                                                                                                                                                                                                                                                                                                                                                                                                                                                                                                                                                                                                                                                                                                                                                                                                                                                                                                                                                                                                                                                                                                                                                                                                                             | 2017<br>2019                                                                                                                                                                                                                                                                                                                                                                                                                                                                                                                                                                                                                                                                                                                                                                                                                                                                                                                                                                                                                                                                                                                                                                                                                                                                                                                                                                                                                                                                                                                                                                                       | 3(5) 751-756<br>13(1) 6-12                                                                                                                                                                                                                                                                                                                                                                                                                                                                                                                                                                                                                                                                                                   |                                                                                                                                                                                                                                                                                                                                                                                                                                                                                                                                                                                                                                                                                                                                                                                                                                                                                                                                                                                                                                                                                                                                                                                                                                                                                                                   |
| 105 | BRCS              | Sinclair VG & Wallston KA                                                                                                                                                                                                                                                                                                             | The Development and Psychometric Evaluation of the Brief Resilient Coping Scale                                                                                                                                                                                                                                                                                                                                                                                                                                                                                                                                                                                                                                                                                                                                                                                                                                                                                                                                                                                                                                                                                                                                                                                                                                                                                                                                                                                                                                                                                                                                                                                                                                                                                                                                                                                                                                                                                                                                                                                                                                                                                                                                                                                                                                                                                                                                                                                                                                                                                                                                                                                                                                                                                                                                                                                                                                                                                                                                                                                                                                                                                                                                                                                                                                                                                                                                                                                                                                                                                                                                                                                                                                                                                                                                                                                                                                                                                                                                                                                                                                                                                                                                                                                                                                                                                                                                                                                                                                                                                                                                                                                                      | 2004                                                                                                                                                                                                                                                                                                                                                                                                                                                                                                                                                                                                                                                                                                                                                                                                                                                                                                                                                                                                                                                                                                                                                                                                                                                                                                                                                                                                                                                                                                                                                                                               | 11(1) 94-101                                                                                                                                                                                                                                                                                                                                                                                                                                                                                                                                                                                                                                                                                                                 |                                                                                                                                                                                                                                                                                                                                                                                                                                                                                                                                                                                                                                                                                                                                                                                                                                                                                                                                                                                                                                                                                                                                                                                                                                                                                                                   |
| 106 | ESES              | Nessen T, et al.                                                                                                                                                                                                                                                                                                                      | The Swedish Exercise Self-Efficacy Scale (ESES-5): reliability and validity in a rheumatoid arthritis population                                                                                                                                                                                                                                                                                                                                                                                                                                                                                                                                                                                                                                                                                                                                                                                                                                                                                                                                                                                                                                                                                                                                                                                                                                                                                                                                                                                                                                                                                                                                                                                                                                                                                                                                                                                                                                                                                                                                                                                                                                                                                                                                                                                                                                                                                                                                                                                                                                                                                                                                                                                                                                                                                                                                                                                                                                                                                                                                                                                                                                                                                                                                                                                                                                                                                                                                                                                                                                                                                                                                                                                                                                                                                                                                                                                                                                                                                                                                                                                                                                                                                                                                                                                                                                                                                                                                                                                                                                                                                                                                                                     | 2015                                                                                                                                                                                                                                                                                                                                                                                                                                                                                                                                                                                                                                                                                                                                                                                                                                                                                                                                                                                                                                                                                                                                                                                                                                                                                                                                                                                                                                                                                                                                                                                               | 37(2) 130-214                                                                                                                                                                                                                                                                                                                                                                                                                                                                                                                                                                                                                                                                                                                |                                                                                                                                                                                                                                                                                                                                                                                                                                                                                                                                                                                                                                                                                                                                                                                                                                                                                                                                                                                                                                                                                                                                                                                                                                                                                                                   |
| 107 | JP-SES            | Niedermann K, et al.<br>Zhao WH, et al.                                                                                                                                                                                                                                                                                               | Development and psychometric properties of a joint protection self-efficacy scale<br>Validation of the Chinese version of joint protection self-efficacy scale in patients with rheumatoid arthritis                                                                                                                                                                                                                                                                                                                                                                                                                                                                                                                                                                                                                                                                                                                                                                                                                                                                                                                                                                                                                                                                                                                                                                                                                                                                                                                                                                                                                                                                                                                                                                                                                                                                                                                                                                                                                                                                                                                                                                                                                                                                                                                                                                                                                                                                                                                                                                                                                                                                                                                                                                                                                                                                                                                                                                                                                                                                                                                                                                                                                                                                                                                                                                                                                                                                                                                                                                                                                                                                                                                                                                                                                                                                                                                                                                                                                                                                                                                                                                                                                                                                                                                                                                                                                                                                                                                                                                                                                                                                                 | 2011<br>2019                                                                                                                                                                                                                                                                                                                                                                                                                                                                                                                                                                                                                                                                                                                                                                                                                                                                                                                                                                                                                                                                                                                                                                                                                                                                                                                                                                                                                                                                                                                                                                                       | 18(2) 143-152<br>38(8) 119-2127                                                                                                                                                                                                                                                                                                                                                                                                                                                                                                                                                                                                                                                                                              |                                                                                                                                                                                                                                                                                                                                                                                                                                                                                                                                                                                                                                                                                                                                                                                                                                                                                                                                                                                                                                                                                                                                                                                                                                                                                                                   |
| 108 | RAEH              | Contreras-Yáñez I, et al.                                                                                                                                                                                                                                                                                                             | Psychometric Validation of an Empowerment Scale for Spanish-speaking Patients With Rheumatoid Arthritis                                                                                                                                                                                                                                                                                                                                                                                                                                                                                                                                                                                                                                                                                                                                                                                                                                                                                                                                                                                                                                                                                                                                                                                                                                                                                                                                                                                                                                                                                                                                                                                                                                                                                                                                                                                                                                                                                                                                                                                                                                                                                                                                                                                                                                                                                                                                                                                                                                                                                                                                                                                                                                                                                                                                                                                                                                                                                                                                                                                                                                                                                                                                                                                                                                                                                                                                                                                                                                                                                                                                                                                                                                                                                                                                                                                                                                                                                                                                                                                                                                                                                                                                                                                                                                                                                                                                                                                                                                                                                                                                                                              | 2018                                                                                                                                                                                                                                                                                                                                                                                                                                                                                                                                                                                                                                                                                                                                                                                                                                                                                                                                                                                                                                                                                                                                                                                                                                                                                                                                                                                                                                                                                                                                                                                               | 20(1) 244                                                                                                                                                                                                                                                                                                                                                                                                                                                                                                                                                                                                                                                                                                                    |                                                                                                                                                                                                                                                                                                                                                                                                                                                                                                                                                                                                                                                                                                                                                                                                                                                                                                                                                                                                                                                                                                                                                                                                                                                                                                                   |
| 109 | RAI               | Callahan LF, et al.                                                                                                                                                                                                                                                                                                                   | Further analysis of learned helplessness in rheumatoid arthritis using a "Rheumatology Attitudes Index"                                                                                                                                                                                                                                                                                                                                                                                                                                                                                                                                                                                                                                                                                                                                                                                                                                                                                                                                                                                                                                                                                                                                                                                                                                                                                                                                                                                                                                                                                                                                                                                                                                                                                                                                                                                                                                                                                                                                                                                                                                                                                                                                                                                                                                                                                                                                                                                                                                                                                                                                                                                                                                                                                                                                                                                                                                                                                                                                                                                                                                                                                                                                                                                                                                                                                                                                                                                                                                                                                                                                                                                                                                                                                                                                                                                                                                                                                                                                                                                                                                                                                                                                                                                                                                                                                                                                                                                                                                                                                                                                                                              | 1988                                                                                                                                                                                                                                                                                                                                                                                                                                                                                                                                                                                                                                                                                                                                                                                                                                                                                                                                                                                                                                                                                                                                                                                                                                                                                                                                                                                                                                                                                                                                                                                               | 15(3) 418-426                                                                                                                                                                                                                                                                                                                                                                                                                                                                                                                                                                                                                                                                                                                |                                                                                                                                                                                                                                                                                                                                                                                                                                                                                                                                                                                                                                                                                                                                                                                                                                                                                                                                                                                                                                                                                                                                                                                                                                                                                                                   |
| 110 | RASE              | Brady TJ<br>Garratt AM, et al.<br>Hewlett S, et al.<br>Hewlett S, et al.<br>Primdahl J, et al.<br>Contreras-Yáñez, et al.                                                                                                                                                                                                             | Measures of self-efficacy: Arthritis Self-Efficacy Scale (ASES), Arthritis Self-Efficacy Scale-8 Item (ASES-8), Children's Arthritis Self-Efficacy Scale (CASE), Chronic Disease Self-Efficacy Scale (CDSES), Parent's Arthritis Self-Efficacy Scale (PASE), and Rheumatoid Arthritis Self-Efficacy Scale (RASES)<br>Development and validation of a self efficacy scale for use in British patients with RA<br>Sensitivity to change of the Rheumatoid Arthritis Self-Efficacy scale (RASE) and predictors of change in self-efficacy<br>Self-efficacy in Rheumatoid Arthritis: Translation and Test of Validity, Reliability and Sensitivity of the Danish Version of the Rheumatoid Arthritis Self-Efficacy Questionnaire (RASE)<br>Validation of a risk perception questionnaire developed for patients with rheumatoid arthritis                                                                                                                                                                                                                                                                                                                                                                                                                                                                                                                                                                                                                                                                                                                                                                                                                                                                                                                                                                                                                                                                                                                                                                                                                                                                                                                                                                                                                                                                                                                                                                                                                                                                                                                                                                                                                                                                                                                                                                                                                                                                                                                                                                                                                                                                                                                                                                                                                                                                                                                                                                                                                                                                                                                                                                                                                                                                                                                                                                                                                                                                                                                                                                                                                                                                                                                                                                                                                                                                                                                                                                                                                                                                                                                                                                                                                                                | 2011<br>2014<br>2001<br>2008<br>2010<br>2019                                                                                                                                                                                                                                                                                                                                                                                                                                                                                                                                                                                                                                                                                                                                                                                                                                                                                                                                                                                                                                                                                                                                                                                                                                                                                                                                                                                                                                                                                                                                                       | 63(11) 473-5485<br>30(7) 161-171<br>40(11) 221-1230<br>6(1) 49-67<br>8(3) 123-135<br>14(7) 0219921                                                                                                                                                                                                                                                                                                                                                                                                                                                                                                                                                                                                                           |                                                                                                                                                                                                                                                                                                                                                                                                                                                                                                                                                                                                                                                                                                                                                                                                                                                                                                                                                                                                                                                                                                                                                                                                                                                                                                                   |
| 111 | RPQ               | Contreras-Yáñez, et al.                                                                                                                                                                                                                                                                                                               | Validation of a risk perception questionnaire developed for patients with rheumatoid arthritis                                                                                                                                                                                                                                                                                                                                                                                                                                                                                                                                                                                                                                                                                                                                                                                                                                                                                                                                                                                                                                                                                                                                                                                                                                                                                                                                                                                                                                                                                                                                                                                                                                                                                                                                                                                                                                                                                                                                                                                                                                                                                                                                                                                                                                                                                                                                                                                                                                                                                                                                                                                                                                                                                                                                                                                                                                                                                                                                                                                                                                                                                                                                                                                                                                                                                                                                                                                                                                                                                                                                                                                                                                                                                                                                                                                                                                                                                                                                                                                                                                                                                                                                                                                                                                                                                                                                                                                                                                                                                                                                                                                       | 2019                                                                                                                                                                                                                                                                                                                                                                                                                                                                                                                                                                                                                                                                                                                                                                                                                                                                                                                                                                                                                                                                                                                                                                                                                                                                                                                                                                                                                                                                                                                                                                                               | 3 4                                                                                                                                                                                                                                                                                                                                                                                                                                                                                                                                                                                                                                                                                                                          |                                                                                                                                                                                                                                                                                                                                                                                                                                                                                                                                                                                                                                                                                                                                                                                                                                                                                                                                                                                                                                                                                                                                                                                                                                                                                                                   |
| 112 | SCBS              | Nadrian H, et al.                                                                                                                                                                                                                                                                                                                     | Development and psychometric properties of a self-care behaviors scale (SCBS) among patients with rheumatoid arthritis [published correction appears in BMC Rheumatol. 2019 Aug 20;3:55]                                                                                                                                                                                                                                                                                                                                                                                                                                                                                                                                                                                                                                                                                                                                                                                                                                                                                                                                                                                                                                                                                                                                                                                                                                                                                                                                                                                                                                                                                                                                                                                                                                                                                                                                                                                                                                                                                                                                                                                                                                                                                                                                                                                                                                                                                                                                                                                                                                                                                                                                                                                                                                                                                                                                                                                                                                                                                                                                                                                                                                                                                                                                                                                                                                                                                                                                                                                                                                                                                                                                                                                                                                                                                                                                                                                                                                                                                                                                                                                                                                                                                                                                                                                                                                                                                                                                                                                                                                                                                             | 2011                                                                                                                                                                                                                                                                                                                                                                                                                                                                                                                                                                                                                                                                                                                                                                                                                                                                                                                                                                                                                                                                                                                                                                                                                                                                                                                                                                                                                                                                                                                                                                                               | 9 2                                                                                                                                                                                                                                                                                                                                                                                                                                                                                                                                                                                                                                                                                                                          |                                                                                                                                                                                                                                                                                                                                                                                                                                                                                                                                                                                                                                                                                                                                                                                                                                                                                                                                                                                                                                                                                                                                                                                                                                                                                                                   |
| 113 | SIAQ              | Keininger D & Coteur G                                                                                                                                                                                                                                                                                                                | Assessment of self-injection experience in patients with rheumatoid arthritis: psychometric validation of the Self-Injection Assessment Questionnaire (SIAQ)                                                                                                                                                                                                                                                                                                                                                                                                                                                                                                                                                                                                                                                                                                                                                                                                                                                                                                                                                                                                                                                                                                                                                                                                                                                                                                                                                                                                                                                                                                                                                                                                                                                                                                                                                                                                                                                                                                                                                                                                                                                                                                                                                                                                                                                                                                                                                                                                                                                                                                                                                                                                                                                                                                                                                                                                                                                                                                                                                                                                                                                                                                                                                                                                                                                                                                                                                                                                                                                                                                                                                                                                                                                                                                                                                                                                                                                                                                                                                                                                                                                                                                                                                                                                                                                                                                                                                                                                                                                                                                                         | 1987                                                                                                                                                                                                                                                                                                                                                                                                                                                                                                                                                                                                                                                                                                                                                                                                                                                                                                                                                                                                                                                                                                                                                                                                                                                                                                                                                                                                                                                                                                                                                                                               | 31(1) 53-64                                                                                                                                                                                                                                                                                                                                                                                                                                                                                                                                                                                                                                                                                                                  |                                                                                                                                                                                                                                                                                                                                                                                                                                                                                                                                                                                                                                                                                                                                                                                                                                                                                                                                                                                                                                                                                                                                                                                                                                                                                                                   |
| 114 | VPMI              | Brown GK & Nicassio PM<br>Smith CA, et al.                                                                                                                                                                                                                                                                                            | Development of a questionnaire for the assessment of active and passive coping strategies in chronic pain patients<br>Beyond good and bad coping: A multidimensional examination of coping with pain in persons with rheumatoid arthritis                                                                                                                                                                                                                                                                                                                                                                                                                                                                                                                                                                                                                                                                                                                                                                                                                                                                                                                                                                                                                                                                                                                                                                                                                                                                                                                                                                                                                                                                                                                                                                                                                                                                                                                                                                                                                                                                                                                                                                                                                                                                                                                                                                                                                                                                                                                                                                                                                                                                                                                                                                                                                                                                                                                                                                                                                                                                                                                                                                                                                                                                                                                                                                                                                                                                                                                                                                                                                                                                                                                                                                                                                                                                                                                                                                                                                                                                                                                                                                                                                                                                                                                                                                                                                                                                                                                                                                                                                                            | 1987<br>1997                                                                                                                                                                                                                                                                                                                                                                                                                                                                                                                                                                                                                                                                                                                                                                                                                                                                                                                                                                                                                                                                                                                                                                                                                                                                                                                                                                                                                                                                                                                                                                                       | 31(1) 53-64<br>19(1) 11-21                                                                                                                                                                                                                                                                                                                                                                                                                                                                                                                                                                                                                                                                                                   |                                                                                                                                                                                                                                                                                                                                                                                                                                                                                                                                                                                                                                                                                                                                                                                                                                                                                                                                                                                                                                                                                                                                                                                                                                                                                                                   |
| 115 | ENAT              | Cruz A, et al.<br>Drágoi RG, et al.<br>Ndots M, et al.                                                                                                                                                                                                                                                                                | Cross-cultural validation of the portuguese version of the Educational Needs Assessment Tool (PORTENAT)<br>Patient education, disease activity and physical function: can we be more targeted? A cross sectional study among people with rheumatoid arthritis, psoriatic arthritis and hand osteoarthritis<br>Cross-cultural validation of the Educational Needs Assessment Tool in RA in 7 European countries                                                                                                                                                                                                                                                                                                                                                                                                                                                                                                                                                                                                                                                                                                                                                                                                                                                                                                                                                                                                                                                                                                                                                                                                                                                                                                                                                                                                                                                                                                                                                                                                                                                                                                                                                                                                                                                                                                                                                                                                                                                                                                                                                                                                                                                                                                                                                                                                                                                                                                                                                                                                                                                                                                                                                                                                                                                                                                                                                                                                                                                                                                                                                                                                                                                                                                                                                                                                                                                                                                                                                                                                                                                                                                                                                                                                                                                                                                                                                                                                                                                                                                                                                                                                                                                                       | 2015<br>2013<br>2011                                                                                                                                                                                                                                                                                                                                                                                                                                                                                                                                                                                                                                                                                                                                                                                                                                                                                                                                                                                                                                                                                                                                                                                                                                                                                                                                                                                                                                                                                                                                                                               | 40(3) 242-253<br>15(5) 8156<br>12 110                                                                                                                                                                                                                                                                                                                                                                                                                                                                                                                                                                                                                                                                                        |                                                                                                                                                                                                                                                                                                                                                                                                                                                                                                                                                                                                                                                                                                                                                                                                                                                                                                                                                                                                                                                                                                                                                                                                                                                                                                                   |
| 116 | HDFQ-RA           | Sierakowska M, et al.<br>Frayssas T, et al.<br>John H, et al.                                                                                                                                                                                                                                                                         | Developing the Polish Educational Needs Assessment Tool (Pol-ENAT) in rheumatoid arthritis and systemic sclerosis: a cross-cultural validation study using Rasch analysis<br>Translation and adaptation of the French version of the Heart Disease Fact Questionnaire - Rheumatoid Arthritis (HDFQ-RA 182)<br>Development and initial validation of a heart disease knowledge questionnaire for people with rheumatoid arthritis                                                                                                                                                                                                                                                                                                                                                                                                                                                                                                                                                                                                                                                                                                                                                                                                                                                                                                                                                                                                                                                                                                                                                                                                                                                                                                                                                                                                                                                                                                                                                                                                                                                                                                                                                                                                                                                                                                                                                                                                                                                                                                                                                                                                                                                                                                                                                                                                                                                                                                                                                                                                                                                                                                                                                                                                                                                                                                                                                                                                                                                                                                                                                                                                                                                                                                                                                                                                                                                                                                                                                                                                                                                                                                                                                                                                                                                                                                                                                                                                                                                                                                                                                                                                                                                     | 2017<br>2017<br>2009                                                                                                                                                                                                                                                                                                                                                                                                                                                                                                                                                                                                                                                                                                                                                                                                                                                                                                                                                                                                                                                                                                                                                                                                                                                                                                                                                                                                                                                                                                                                                                               | 84(6) 693-698<br>77(1) 136-143<br>22(11) 031-2044                                                                                                                                                                                                                                                                                                                                                                                                                                                                                                                                                                                                                                                                            |                                                                                                                                                                                                                                                                                                                                                                                                                                                                                                                                                                                                                                                                                                                                                                                                                                                                                                                                                                                                                                                                                                                                                                                                                                                                                                                   |
| 117 | RA-KAS            | Naqvi AA, et al.                                                                                                                                                                                                                                                                                                                      | Development and validation of a novel rheumatoid arthritis knowledge assessment scale in Pakistani patients with rheumatoid arthritis                                                                                                                                                                                                                                                                                                                                                                                                                                                                                                                                                                                                                                                                                                                                                                                                                                                                                                                                                                                                                                                                                                                                                                                                                                                                                                                                                                                                                                                                                                                                                                                                                                                                                                                                                                                                                                                                                                                                                                                                                                                                                                                                                                                                                                                                                                                                                                                                                                                                                                                                                                                                                                                                                                                                                                                                                                                                                                                                                                                                                                                                                                                                                                                                                                                                                                                                                                                                                                                                                                                                                                                                                                                                                                                                                                                                                                                                                                                                                                                                                                                                                                                                                                                                                                                                                                                                                                                                                                                                                                                                                | 2019                                                                                                                                                                                                                                                                                                                                                                                                                                                                                                                                                                                                                                                                                                                                                                                                                                                                                                                                                                                                                                                                                                                                                                                                                                                                                                                                                                                                                                                                                                                                                                                               | 22(11) 031-2044                                                                                                                                                                                                                                                                                                                                                                                                                                                                                                                                                                                                                                                                                                              |                                                                                                                                                                                                                                                                                                                                                                                                                                                                                                                                                                                                                                                                                                                                                                                                                                                                                                                                                                                                                                                                                                                                                                                                                                                                                                                   |
| 118 | PROMIS-GH v1.1-SF | Wohlfahrt A, et al.                                                                                                                                                                                                                                                                                                                   | Responsiveness of Patient-Reported Outcomes Measurement Information System Measures in Rheumatoid Arthritis Patients Starting or Switching a Disease-Modifying Antirheumatic Drug                                                                                                                                                                                                                                                                                                                                                                                                                                                                                                                                                                                                                                                                                                                                                                                                                                                                                                                                                                                                                                                                                                                                                                                                                                                                                                                                                                                                                                                                                                                                                                                                                                                                                                                                                                                                                                                                                                                                                                                                                                                                                                                                                                                                                                                                                                                                                                                                                                                                                                                                                                                                                                                                                                                                                                                                                                                                                                                                                                                                                                                                                                                                                                                                                                                                                                                                                                                                                                                                                                                                                                                                                                                                                                                                                                                                                                                                                                                                                                                                                                                                                                                                                                                                                                                                                                                                                                                                                                                                                                    | 2019                                                                                                                                                                                                                                                                                                                                                                                                                                                                                                                                                                                                                                                                                                                                                                                                                                                                                                                                                                                                                                                                                                                                                                                                                                                                                                                                                                                                                                                                                                                                                                                               | 71(4) 521-529                                                                                                                                                                                                                                                                                                                                                                                                                                                                                                                                                                                                                                                                                                                |                                                                                                                                                                                                                                                                                                                                                                                                                                                                                                                                                                                                                                                                                                                                                                                                                                                                                                                                                                                                                                                                                                                                                                                                                                                                                                                   |
| 119 | PQLC-RA           | Danao LL, et al.<br>Sizova LV                                                                                                                                                                                                                                                                                                         | An English and Spanish Quality of Life Measure for Rheumatoid Arthritis<br>Validation of the Russian version of the Quality of Life-Rheumatoid Arthritis Scale (QOL-RA Scale)                                                                                                                                                                                                                                                                                                                                                                                                                                                                                                                                                                                                                                                                                                                                                                                                                                                                                                                                                                                                                                                                                                                                                                                                                                                                                                                                                                                                                                                                                                                                                                                                                                                                                                                                                                                                                                                                                                                                                                                                                                                                                                                                                                                                                                                                                                                                                                                                                                                                                                                                                                                                                                                                                                                                                                                                                                                                                                                                                                                                                                                                                                                                                                                                                                                                                                                                                                                                                                                                                                                                                                                                                                                                                                                                                                                                                                                                                                                                                                                                                                                                                                                                                                                                                                                                                                                                                                                                                                                                                                        | 2001<br>2009                                                                                                                                                                                                                                                                                                                                                                                                                                                                                                                                                                                                                                                                                                                                                                                                                                                                                                                                                                                                                                                                                                                                                                                                                                                                                                                                                                                                                                                                                                                                                                                       | 45(2) 167-173<br>54(1) 27-31                                                                                                                                                                                                                                                                                                                                                                                                                                                                                                                                                                                                                                                                                                 |                                                                                                                                                                                                                                                                                                                                                                                                                                                                                                                                                                                                                                                                                                                                                                                                                                                                                                                                                                                                                                                                                                                                                                                                                                                                                                                   |
| 120 | RAQoL             | de Jong Z, et al.<br>Duarte C, et al.<br>Greenwood MC, et al.<br>Greenwood MC, et al.<br>Heaney A, et al.<br>Hedin PJ, et al.<br>Linde L, et al.<br>Marra CA, et al.<br>Swinkels RA, et al.<br>Tijhuis GJ, et al.<br>Waimann CA, et al.<br>Whalley D, et al.<br>Wilburn J, et al.<br>Zlatkovic-Svenda M, et al.                       | The reliability and construct validity of the RAQoL: a rheumatoid arthritis-specific quality of life instrument<br>Validation of Rheumatoid Arthritis Quality of Life (RAQoL) Questionnaire into Portuguese Language [Validation of Rheumatoid Arthritis Quality of Life (RAQoL) Questionnaire into Portuguese Language]<br>A simple extension to the Rheumatoid Arthritis Quality of Life Questionnaire (RAQoL) to explore individual patient concerns and monitor group outcome in clinical practice<br>Touch-screen computer systems in the rheumatology clinic offer a reliable and user-friendly means of collecting quality-of-life and outcome data from patients with rheumatoid arthritis<br>A Review of the Psychometric Properties and Use of the Rheumatoid Arthritis Quality of Life Questionnaire (RAQoL) in Clinical Research<br>The Rheumatoid Arthritis Quality of Life (RAQoL) for Sweden: adaptation and validation<br>Health-Related Quality of Life: Validity, Reliability, and Responsiveness of SF-36, EQ-5D, EQ-5D, RAQoL, and HAQ in Patients with Rheumatoid Arthritis<br>A comparison of generic, indirect utility measures (the HUI2, HUI3, SF-6D, and the EQ-5D) and disease-specific instruments (the RAQoL and the HAQ) in rheumatoid arthritis<br>Which are the best instruments for measuring disabilities in gait and gait-related activities in patients with rheumatic disorders<br>The validity of the Rheumatoid Arthritis Quality of Life (RAQoL) questionnaire<br>Quality of life of patients with rheumatoid arthritis in Argentina: reliability, validity, and sensitivity to change of a Spanish version of the Rheumatoid Arthritis Quality of Life questionnaire<br>Quality of life in rheumatoid arthritis<br>Further international adaptation and validation of the Rheumatoid Arthritis Quality of Life (RAQoL) questionnaire<br>Adaptation and validation of the Rheumatoid Arthritis Quality of Life (RAQoL) questionnaire for use in Serbia<br>Understanding the Relationship between the EQ-5D, SF-6D, HAQ and Disease Activity in Inflammatory Arthritis<br>Assessing Utility Values in Rheumatoid Arthritis: A Comparison Between Time Trade-Off and the EuroQoL<br>A comparison of the performance of the EQ-5D and SF-6D for individuals aged 30-45 years<br>Comparative Responsiveness of the EuroQoL-5D and Short Form 6D to Improvement in Patients With Rheumatoid Arthritis Treated With Tumor Necrosis Factor Blockers: Results of the Dutch Rheumatoid Arthritis Monitoring Registry<br>Variation in the estimation of quality-adjusted life-years by different preference-based instruments.<br>An empirical evaluation of the SF-12, SF-6D, EQ-5D and Michigan Hand Outcome Questionnaire in patients with rheumatoid arthritis of the hand<br>Comparing the Performance of the SF-6D and the EQ-5D in Different Patient Groups<br>Comparison of the EQ-5D and the SF-6D Utility Measures in 813 Patients with Early Arthritis: Results from the ESPOIR Cohort<br>Development and validation of the Dutch version of the London Handicap Scale<br>Exploring the validity of estimating EQ-5D and SF-6D utility values from the health assessment questionnaire in patients with inflammatory arthritis<br>The comparative responsiveness of the EQ-5D and SF-6D to change in patients with inflammatory arthritis<br>Psychometric validation of Chinese Health Assessment Questionnaire for use in rheumatoid arthritis patients in China<br>Measuring health-related quality of life in rheumatoid arthritis: validity, responsiveness and reliability of EuroQoL (EQ-5D)<br>Validity of Euroqol—a generic health status instrument—in patients with rheumatoid arthritis. Economic and Health Outcomes Research Group                                                                                                                                                                                                                                                                                                                                                                                                                                                                                                                                                                                                                                                                                                                                                                                                                                                                                             | 1997<br>2019<br>2006<br>2006<br>2017<br>2006<br>2017<br>2006<br>2017<br>2006<br>2016<br>2004<br>2001<br>2012<br>1997<br>2015<br>2017<br>2010<br>2006<br>2008<br>2012<br>2003<br>2017<br>2014<br>2011<br>2015<br>2010<br>2009<br>2017<br>1997<br>2015<br>1997<br>2017<br>2017<br>2010<br>2006<br>2008<br>2012<br>2003<br>2017<br>2014<br>2011<br>2015<br>2010<br>2009<br>2017<br>1997<br>2017<br>1994                                                                                                                                                                                                                                                                                                                                                                                                                                                                                                                                                                                                                                                                                                                                                                                                                                                                                                                                                                                                                                                                                                                                                                                               | 36(8) 878-883<br>44(1) 65-70<br>45(1) 61-65<br>45(1) 66-71<br>13(3) 197-205<br>35(2) 117-123<br>35(8) 528-1537<br>60(7) 571-1542<br>22(1) 25-33<br>40(10) 112-119<br>31(7) 965-1071<br>36(8) 884-888<br>35(4) 669-675<br>37(4) 641-646<br>28(6) 477-487<br>55(5) 751-756<br>17(7) 815-832<br>64(6) 826-832<br>41(7) 791-801<br>15(1) 20<br>27(2) 236-245<br>38(9) 576-1584<br>28(2) 401-408<br>8 21<br>18(9) 195-1205<br>20(12) 987-1992<br>36(5) 551-559<br>33(7) 655-662                                                                                                                                                                                                                                                   |                                                                                                                                                                                                                                                                                                                                                                                                                                                                                                                                                                                                                                                                                                                                                                                                                                                                                                                                                                                                                                                                                                                                                                                                                                                                                                                   |
| 121 | EQ-5D             | Adams R, et al.<br>Ariza-Ariza R, et al.<br>Barton GR, et al.<br>Buitinga L, et al.<br>Conner-Spady B & Suarez-Almazo<br>Dritsakaki M, et al.<br>Ferreira LN, et al.<br>Gaujoux-Viala C, et al.<br>Groothuis-Oudshoorn CG, et al.<br>Harrison M, et al.<br>Harrison M, et al.<br>Hu H, et al.<br>Hurst NP, et al.<br>Hurst NP, et al. | Understanding the Relationship between the EQ-5D, SF-6D, HAQ and Disease Activity in Inflammatory Arthritis<br>Assessing Utility Values in Rheumatoid Arthritis: A Comparison Between Time Trade-Off and the EuroQoL<br>A comparison of the performance of the EQ-5D and SF-6D for individuals aged 30-45 years<br>Comparative Responsiveness of the EuroQoL-5D and Short Form 6D to Improvement in Patients With Rheumatoid Arthritis Treated With Tumor Necrosis Factor Blockers: Results of the Dutch Rheumatoid Arthritis Monitoring Registry<br>Variation in the estimation of quality-adjusted life-years by different preference-based instruments.<br>An empirical evaluation of the SF-12, SF-6D, EQ-5D and Michigan Hand Outcome Questionnaire in patients with rheumatoid arthritis of the hand<br>Comparing the Performance of the SF-6D and the EQ-5D in Different Patient Groups<br>Comparison of the EQ-5D and the SF-6D Utility Measures in 813 Patients with Early Arthritis: Results from the ESPOIR Cohort<br>Development and validation of the Dutch version of the London Handicap Scale<br>Exploring the validity of estimating EQ-5D and SF-6D utility values from the health assessment questionnaire in patients with inflammatory arthritis<br>The comparative responsiveness of the EQ-5D and SF-6D to change in patients with inflammatory arthritis<br>Psychometric validation of Chinese Health Assessment Questionnaire for use in rheumatoid arthritis patients in China<br>Measuring health-related quality of life in rheumatoid arthritis: validity, responsiveness and reliability of EuroQoL (EQ-5D)<br>Validity of Euroqol—a generic health status instrument—in patients with rheumatoid arthritis. Economic and Health Outcomes Research Group                                                                                                                                                                                                                                                                                                                                                                                                                                                                                                                                                                                                                                                                                                                                                                                                                                                                                                                                                                                                                                                                                                                                                                                                                                                                                                                                                                                                                                                                                                                                                                                                                                                                                                                                                                                                                                                                                                                                                                                                                                                                                                                                                                                                                                                                                                                                                                                                                                                                                                                                                                                                                                                                                                                                                                                                                                                                                               | 2010<br>2006<br>2008<br>2012<br>2003<br>2017<br>2014<br>2011<br>2015<br>2010<br>2009<br>2017<br>1997<br>2017<br>1997<br>2017<br>1997<br>2017<br>1994                                                                                                                                                                                                                                                                                                                                                                                                                                                                                                                                                                                                                                                                                                                                                                                                                                                                                                                                                                                                                                                                                                                                                                                                                                                                                                                                                                                                                                               | 28(6) 477-487<br>55(5) 751-756<br>17(7) 815-832<br>64(6) 826-832<br>41(7) 791-801<br>15(1) 20<br>27(2) 236-245<br>38(9) 576-1584<br>28(2) 401-408<br>8 21<br>18(9) 195-1205<br>20(12) 987-1992<br>36(5) 551-559<br>33(7) 655-662                                                                                                                                                                                                                                                                                                                                                                                                                                                                                             |                                                                                                                                                                                                                                                                                                                                                                                                                                                                                                                                                                                                                                                                                                                                                                                                                                                                                                                                                                                                                                                                                                                                                                                                                                                                                                                   |

|                  |                         |                                                                                                                                                                                                                                |                           |      |             |          |
|------------------|-------------------------|--------------------------------------------------------------------------------------------------------------------------------------------------------------------------------------------------------------------------------|---------------------------|------|-------------|----------|
|                  | Kaplan RM, et al.       | Comparison of Measured Utility Scores and Imputed Scores From the SF 36 in Patients with Rheumatoid Arthritis                                                                                                                  | Med Care                  | 2005 | 43(1)       | 79-87    |
|                  | Linde L, et al.         | Health-Related Quality of Life: Validity, Reliability, and Responsiveness of SF-36, EQ-15D, EQ-5D, RAQoL, and HAQ in Patients with Rheumatoid Arthritis                                                                        | J Rheumatol               | 2008 | 35(8)       | 528-1537 |
|                  | Luo N, et al.           | A comparison of the EuroQol-5D and the Health Utilities Index mark 3 in patients with rheumatic disease.                                                                                                                       | J Rheumatol               | 2003 | 30(10)      | 268-2274 |
|                  | Marra CA, et al.        | A Comparison of Four Indirect Methods of Assessing Utility Values in Rheumatoid Arthritis                                                                                                                                      | Med Care                  | 2004 | 42(11)      | 125-1131 |
|                  | Marra CA, et al.        | A comparison of generic, indirect utility measures (the HUI2, HUI3, SF-6D, and the EQ-5D) and disease-specific instruments (the RAQoL and the HAQ) in rheumatoid arthritis                                                     | Soc Sci Med               | 2005 | 60(7)       | 571-1582 |
|                  | Marra CA, et al.        | Are indirect utility measures reliable and responsive in rheumatoid arthritis patients?                                                                                                                                        | Qual Life Res             | 2005 | 14(5)       | 333-1344 |
|                  | Russell AS, et al.      | The responsiveness of generic health status measures as assessed in patients with rheumatoid arthritis receiving infliximab                                                                                                    | J Rheumatol               | 2003 | 30(5)       | 941-947  |
|                  | Salaffi F, et al.       | A comparison of utility measures using EQ-5D and SF-6D preference-based generic instruments in patients with rheumatoid arthritis                                                                                              | Clin Exp Rheumatol        | 2011 | 29(4)       | 661-671  |
|                  | Traki L, et al.         | Responsiveness of the EuroQol EQ-5D and Hospital Anxiety and Depression Scale (HADS) in rheumatoid arthritis patients receiving tocilizumab                                                                                    | Clin Rheumatol            | 2014 | 33(8)       | 955-1060 |
| <b>122 HUI-2</b> | Marra CA, et al.        | A comparison of generic, indirect utility measures (the HUI2, HUI3, SF-6D, and the EQ-5D) and disease-specific instruments (the RAQoL and the HAQ) in rheumatoid arthritis                                                     | Soc Sci Med               | 2005 | 60(7)       | 571-1582 |
|                  | Marra CA, et al.        | Are indirect utility measures reliable and responsive in rheumatoid arthritis patients?                                                                                                                                        | Qual Life Res             | 2005 | 14(5)       | 333-1344 |
| <b>123 HUI-3</b> | Marra CA, et al.        | A comparison of generic, indirect utility measures (the HUI2, HUI3, SF-6D, and the EQ-5D) and disease-specific instruments (the RAQoL and the HAQ) in rheumatoid arthritis                                                     | Soc Sci Med               | 2005 | 60(7)       | 571-1582 |
|                  | Marra CA, et al.        | Are indirect utility measures reliable and responsive in rheumatoid arthritis patients?                                                                                                                                        | Qual Life Res             | 2005 | 14(5)       | 333-1344 |
| <b>124 QWB</b>   | Bombardier C & Raboud J | A comparison of health-related quality-of-life measures for rheumatoid arthritis research. The Auranofin Cooperating Group.                                                                                                    | Control Clin Trials       | 1991 | 12(4 Suppl) | 243-5256 |
| <b>125 SF-6D</b> | Buitinga L, et al.      | Comparative Responsiveness of the EuroQol-5D and Short Form 6D to Improvement in Patients With Rheumatoid Arthritis Treated With Tumor Necrosis Factor Blockers: Results of the Dutch Rheumatoid Arthritis Monitoring Registry | Arthritis Care Res        | 2012 | 64(6)       | 826-832  |
|                  | Campollina AG, et al.   | The SF-6D Brazil questionnaire: generation models and applications in health economics                                                                                                                                         | Rev Assoc Med Bras        | 2010 | 56(4)       | 409-14   |
|                  | Dritsaki M, et al.      | An empirical evaluation of the SF-12, SF-6D, EQ-5D and Michigan Hand Outcome Questionnaire in patients with rheumatoid arthritis of the hand                                                                                   | Health Qual Life Outcomes | 2017 | 15(1)       | 20       |
|                  | Ferreira LN, et al.     | Comparing the Performance of the SF-6D and the EQ-5D in Different Patient Groups                                                                                                                                               | Acta Med Port             | 2014 | 27(2)       | 236-245  |
|                  | Gaugous-Viala C, et al. | Comparison of the EQ-5D and the SF-6D Utility Measures in 813 Patients with Early Arthritis: Results from the ESPOIR Cohort                                                                                                    | J Rheumatol               | 2011 | 38(8)       | 576-1584 |
|                  | Harrison MJ, et al.     | The comparative responsiveness of the EQ-5D and SF-6D to change in patients with inflammatory arthritis                                                                                                                        | Qual Life Res             | 2009 | 18(9)       | 195-1205 |
|                  | Harrison MJ, et al.     | The Validity and Responsiveness of Generic Utility Measures in Rheumatoid Arthritis: A Review                                                                                                                                  | J Rheumatol               | 2008 | 35(4)       | 592-602  |
|                  | Marra CA, et al.        | A comparison of generic, indirect utility measures (the HUI2, HUI3, SF-6D, and the EQ-5D) and disease-specific instruments (the RAQoL and the HAQ) in rheumatoid arthritis                                                     | Soc Sci Med               | 2005 | 60(7)       | 571-1582 |
|                  | Marra CA, et al.        | Are indirect utility measures reliable and responsive in rheumatoid arthritis patients?                                                                                                                                        | Qual Life Res             | 2005 | 14(5)       | 333-1344 |
|                  | Russell AS, et al.      | The responsiveness of generic health status measures as assessed in patients with rheumatoid arthritis receiving infliximab                                                                                                    | J Rheumatol               | 2003 | 30(5)       | 941-947  |
|                  | Salaffi F, et al.       | A comparison of utility measures using EQ-5D and SF-6D preference-based generic instruments in patients with rheumatoid arthritis                                                                                              | Clin Exp Rheumatol        | 2011 | 29(4)       | 661-671  |
