# Supplementary material for: Use and detailed metric properties of patient-reported outcome measures for rheumatoid arthritis: a systematic review covering two decades
Source: PubMed Central journal article supplement (PMC8356163; doi:10.1136/rmdopen-2021-001707), 2021-08-10
Supplement: rmdopen-2021-001707supp005.pdf [file rmdopen-2021-001707supp005.pdf]

| nemonic      | Full Name                                                     |
|--------------|---------------------------------------------------------------|
| 1 AQoL       | Assessment of Quality of Life                                 |
| 2 BAQ        | Body Awareness Questionnaire                                  |
| 3 BDI-II     | Beck depression Inventory -II                                 |
| 4 BI         | Barthel Index                                                 |
| 5 CIJS       | Chronic Illness Job Strain Scale                              |
| 6 DELAY      | Delays in Evaluating Arthritis Early Questionnaire            |
| 7 ECS        | Effective Consumer Scale                                      |
| 8 ESS        | Epworth Sleepiness Scale                                      |
| 9 FAAM       | Foot and Ankle Ability Measure                                |
| 10 FAOQ      | Foot and Ankle Outcome Questionnaire                          |
| 11 FFF-R     | Revised Foot Function Index                                   |
| 12 FIM       | Functional Independence Measure                               |
| 13 FSFI      | Female Sexual Function Index                                  |
| 14 GCO       | General Coping Questionnaire                                  |
| 15 GDS       | Geriatric Depression Scale                                    |
| 16 GSES      | Generalised Self-efficacy Scale                               |
| 17 heiQ      | The Health Education Impact Questionnaire                     |
| 18 HLQ       | Health and Labor Questionnaire                                |
| 19 HPQ       | Health and Work Performance Questionnaire                     |
| 20 H5-D      | Health State descriptive system                               |
| 21 IPA       | Participation and Autonomy Questionnaire                      |
| 22 ISI       | Insomnia Severity Index                                       |
| 23 LHS       | London Handicap Scale                                         |
| 24 LSI       | Life satisfaction index                                       |
| 25 LSNS      | Lubben Social Network Scale                                   |
| 26 MADRS     | Montgomery-Asberg Depression Rating Scale                     |
| 27 MHIQ      | THE McMASTER HEALTH INDEX QUESTIONNAIRE                       |
| 28 MPQ       | McGill Pain Questionnaire                                     |
| 29 OBQ       | Occupational Balance Questionnaire                            |
| 30 PEQ       | Patient Experiences Questionnaire                             |
| 31 PGWBI     | Psychological General Well-being Index                        |
| 32 PHQ-2     | Patient Health Questionnaire -2                               |
| 33 PHQ-9     | Patient Health Questionnaire -9                               |
| 34 PMI       | Pain Management Inventory                                     |
| 35 PMS       | Profile of Moods State                                        |
| 36 ProF      | Profile of Fatigue                                            |
| 37 PROMIS-PI | PROMIS pain interference                                      |
| 38 PSQI      | Pittsburg Sleep Quality Index                                 |
| 39 QOLS      | Quality of Life Scale (QOLS)                                  |
| 40 SAQ       | Sleep Assessment Questionnaire                                |
| 41 SCL-90-R  | Symptom Checklist-90-Revised                                  |
| 42 SIP       | Sickness Impact Profile                                       |
| 43 SOC       | Sense of Coherence Scale                                      |
| 44 SPADI     | Shoulder Pain and Disability Index                            |
| 45 SQ-RA     | Satisfaction Questionnaire for RA                             |
| 46 XSMFA     | Extra Short Musculoskeletal Function Assessment Questionnaire |
| 47 ZDS       | Zung Self-rating Depression Scale                             |
